# Supplementary material for: The SH-SY5Y cell line in Parkinson’s disease research: a systematic review
Source: Mol Neurodegener. 2017 Jan 24;12:10. doi: 10.1186/s13024-017-0149-0 (PMC5259880; doi:10.1186/s13024-017-0149-0)
Supplement: Additional file 1: — List of articles resulting from the literature search and article inclusion/exclusion in this review. Complete list of articles that were obtained with the search terms “Parkinson”, “Parkinson’s”, or “Parkinson’s disease” and “neuroblastoma”, “SH-SY5Y”, “SHSY5Y, or “SHSY-5Y” in PubMed until the 22nd of November 2016. The inclusion and exclusion criteria are specified. (XLSX 263 kb) [file 13024_2017_149_MOESM1_ESM.xlsx]

## Sheet: Additional file 1
Additional file 1. List of articles resulting from the literature search and article inclusion/exclusion in this review.
We conducted a literature search in PubMed that includes the results released before 13 September 2016. The search terms used were “SH-SY5Y Parkinson’s”, which retrieved 1006 articles, and “SH-SY5Y Parkinson”, which retrieved 465 articles. There was an overlap of 442 articles between both search terms. Therefore, the search retrieved a total of 1026 articles. The first screening was performed acc…
PubMed ID	Title	Authors	Journal	Date	Volume:pages	Included
262188	Determination of catecholamines and their 3-O-methylated metabolites in urine by mass fragmentography with use of deuterated internal standards.	Muskiet FA, Thomasson CG, Gerding AM, Fremouw-Ottevangers DC, Nagel GT, Wolthers BG.	Clin Chem	1979 Mar	25(3):453-60	Not PD specific
509705	Assay of 4-hydroxy-3-methoxyphenylacetic (homovanillic) acid by liquid chromatography with electrochemical detection.	Morrisey JL, Shihabi ZK.	Clin Chem.	1979 Dec	25(12):2045-7	Not PD specific
657406	Determination of vanilpyruvic acid in urine by high-speed liquid chromatography	Yoshida A, Yoshioka M, Sakai T, Tamura Z.	Chem Pharm Bull (Tokyo).	1978 Apr	26(4):1177-81	Not PD specific
678300	Studies on urinary DOPAC in man by means of a sensitive automated procedure	Peyrin L, Cottet-Emard JM, Claustre B.	Biochem Med.	1978 Jun	19(3):318-43.	Not PD specific
709835	Determination of 3-methoxy-4-hydroxyphenylpyruvic acid, 3,4-dihydroxyphenylethylene glycol, and 3,4-dihydroxyphenylmandelic acid in urine by mass fragmentography, with use of deuterium-labeled internal standards.	Muskiet FA, Fremouw-Ottevangers DC, Nagel GT, Wolthers BG, de Vries JA.	Clin Chem.	1978 Nov	24(11):2001-8	Not PD specific
1355366	Transplantation of human neuroblastoma cells, catecholaminergic and non-catecholaminergic: effects on rotational behavior in Parkinson's rat model.	Manaster JS1, Feuerman T, Reynolds CP, Markham CH.	J Neural Transplant Plast.	1992 Apr-Sep	3(2-3):139-50	Neuroblastoma, not SH-SY5Y
1613515	Brain-derived neurotrophic factor protects dopamine neurons against 6-hydroxydopamine and N-methyl-4-phenylpyridinium ion toxicity: involvement of the glutathione system	Spina MB, Squinto SP, Miller J, Lindsay RM, Hyman C.	J Neurochem.	1992 Jul	59(1):99-106.	x
1840645	Cloning of the gene for a human dopamine D4 receptor with high affinity for the antipsychotic clozapine.	Van Tol HH1, Bunzow JR, Guan HC, Sunahara RK, Seeman P, Niznik HB, Civelli O.	Nature.	1991 Apr 18	350(6319):610-4	Not PD specific
1981276	Exogeneous expression of L-dopa and dopamine in various cell lines following transfer of rat and human tyrosine hydroxylase cDNA: grafting in an animal model of Parkinson's disease.	Horellou P1, Marlier L, Privat A, Darchen F, Scherman D, Henry JP, Mallet J.	Prog Brain Res.	1990	82:23-32	Not accessible
2290954	Polymer encapsulated dopaminergic cell lines as "alternative neural grafts".	Jaeger CB1, Greene LA, Tresco PA, Winn SR, Aebischer P.	Prog Brain Res.	1990	82:41-6	Neuroblastoma, not SH-SY5Y
2567196	Biochemical properties of monoamine-rich human neuroblastoma cells.	Mena MA1, Garcia de Yebenes J, Dwork A, Fahn S, Latov N, Herbert J, Flaster E, Slonim D.	Brain Res.	1989 May 8	486(2):286-96	Neuroblastoma, not SH-SY5Y
2571152	Retroviral transfer of a human tyrosine hydroxylase cDNA in various cell lines: regulated release of dopamine in mouse anterior pituitary AtT-20 cells.	Horellou P1, Guibert B, Leviel V, Mallet J.	Proc Natl Acad Sci U S A.	1989 Sep	86(18):7233-7	Neuroblastoma, not SH-SY5Y
2621843	Clinical significance of homovanillic acid analysis in endocrine tests of the adrenal medulla and sympathetic nervous system	Shigetomi S.	Nihon Rinsho.	1989 Dec	48 Suppl:1182-5	Japanese
3027261	Neuromelanogenic and cytotoxic properties of canine brainstem peroxidase.	Grisham MB, Perez VJ, Everse J.	J Neurochem.	1987 Mar	48(3):876-82	Neuroblastoma, not SH-SY5Y
3221529	[3H]GBR-12935 binding sites in human striatal membranes: binding characteristics and changes in parkinsonians and schizophrenics.	Hirai M1, Kitamura N, Hashimoto T, Nakai T, Mita T, Shirakawa O, Yamadori T, Amano T, Noguchi-Kuno SA, Tanaka C.	Jpn J Pharmacol.	1988 Jul	47(3):237-43	Not PD specific
3359274	Memantine (1-amino-3,5-dimethyladamantane) blocks the serotonin-induced depolarization response in a neuronal cell line.	Reiser G1, Binmöller FJ, Koch R.	Brain Res.	1988 Mar 8	443(1-2):338-44	Not PD specific
4746822	Separation and determination of urinary homovanillic acid and iso-homovanillic acid by gas-liquid chromatography and electron capture detection.	Dziedzic SW, Dziedzic LB, Gitlow SE.	J Lab Clin Med.	1973 Nov	82(5):829-35	Not PD specific
4892445	Epileptic discharges occurring in the mesencephalon and thalamus.	Wilson WP, Nashold BS.	Epilepsia.	1968 Dec	9(4):265-73	Not PD specific
5007702	Determination of homoprotocatechic acid in urine by a radioisotopic method	Comoy E, Bohuon C.	Clin Chim Acta.	1972 Jan	36(1):207-12	French
5125322	Iso-homovanillic acid determination in human urine.	Comoy E, Bohuon C.	Clin Chim Acta.	1971 Dec	35(2):369-75	Not PD specific
5552365	Fluorometric method for quantitatively estimating urinary dihydroxyphenylethylamine (dopamine), dihydroxyphenylalanine (dopa), and dihydroxyphenylacetic acid (dopac).	Eichhorn F, Rutenberg A, Kott E.	Clin Chem.	1971 Apr	17(4):296-300	Not PD specific
6538951	Catecholamine toxicity: a proposal for the molecular pathogenesis of manganese neurotoxicity and Parkinson's disease	Graham DG.	Neurotoxicology.	1984 Spring	5(1):83-95	Not accessible
7595558	Effects of dibutyryl cyclic AMP and retinoic acid on the differentiation of dopamine neurons: prevention of cell death by dibutyryl cyclic AMP.	Mena MA1, Casarejos MJ, Bonin A, Ramos JA, García Yébenes J.	J Neurochem.	1995 Dec	65(6):2612-20	Neuroblastoma, not SH-SY5Y
7595666	The morphology of human neuroblastoma cell grafts in the kainic acid-lesioned basal ganglia of the rat	Morton AJ, Williams MN, Emson PC, Faull RL.	J Neurocytol.	1995 Aug	24(8):568-84.	x
7605586	Fibroblast growth factors: structure-activity on dopamine neurons in vitro.	Mena MA1, Casarejos MJ, Gimenéz-Gallego G, Garcia de Yebenes J.	J Neural Transm Park Dis Dement Sect.	1995	9(1):1-14	Neuroblastoma, not SH-SY5Y
8224447	Neurotoxicity of nicotinamide derivatives: their role in the aetiology of Parkinson's disease	Willets JM1, Lunec J, Williams AC, Griffiths HR.	Biochem Soc Trans.	1993 Aug	21 ( Pt 3)(3):299S	Neuroblastoma, not SH-SY5Y
8281125	The effects of 6-hydroxydopamine and oxidative stress on the level of brain metallothionein	Shiraga H1, Pfeiffer RF, Ebadi M.	Neurochem Int.	1993 Dec	23(6):561-6	Neuroblastoma, not SH-SY5Y
8341291	Ascorbic acid protects against levodopa-induced neurotoxicity on a catecholamine-rich human neuroblastoma cell line.	Pardo B1, Mena MA, Fahn S, García de Yébenes J.	Mov Disord.	1993 Jul	8(3):278-84	Neuroblastoma, not SH-SY5Y
8380440	Changes in heat shock protein 70 and ubiquitin mRNA levels in C1300 N2A mouse neuroblastoma cells following treatment with iron.	Uney JB1, Anderton BH, Thomas SM.	J Neurochem.	1993 Feb	60(2):659-65	Neuroblastoma, not SH-SY5Y
8410185	Dopamine transporter expression confers cytotoxicity to low doses of the parkinsonism-inducing neurotoxin 1-methyl-4-phenylpyridinium	Pifl C1, Giros B, Caron MG.	J Neurosci.	1993 Oct	13(10):4246-53	Neuroblastoma, not SH-SY5Y
8584620	Comparison of cytotoxicity of a quaternary pyridinium metabolite of haloperidol (HP+) with neurotoxin N-methyl-4-phenylpyridinium (MPP+) towards cultured dopaminergic neuroblastoma cells	Fang J, Zuo D, Yu PH.	Psychopharmacology (Berl).	1995 Oct	121(3):373-8.	x
8654521	Traumatized rat striatum produces neurite-promoting and neurotrophic activities in vitro	Asada H, Kaseloo PA, Lis A, Petti DM, Plunkett RJ.	Exp Neurol.	1996 Jun	139(2):173-87.	x
8667208	Catecholamine transporters and 1-methyl-4-phenyl-1,2,3,6-tetrahydropyridine neurotoxicity: studies comparing the cloned human noradrenaline and human dopamine transporter	Pifl C1, Hornykiewicz O, Giros B, Caron MG.	J Pharmacol Exp Ther.	1996 Jun	277(3):1437-43	Neuroblastoma, not SH-SY5Y
8786531	Persistent activation of the dopamine D1 receptor contributes to prolonged receptor desensitization: studies with A-77636.	Lin CW1, Bianchi BR, Miller TR, Stashko MA, Wang SS, Curzon P, Bednarz L, Asin KE, Britton DR.	J Pharmacol Exp Ther.	1996 Mar	276(3):1022-9	Neuroblastoma, not SH-SY5Y
8789608	Expression of mRNAs of multiple growth factors and receptors by neuronal cell lines: detection with RT-PCR	Zaheer A1, Zhong W, Lim R.	Neurochem Res.	1995 Dec	20(12):1457-63	Not PD specific
8833764	A continuous striatal infusion of 6-hydroxydopamine produces a terminal axotomy and delayed behavioral effects	Jones BE1, Boylan CB, Fritsche M, Juhasz M, Jackson C, Wiegand SJ, Hyman C, Lindsay RM, Altar CA.	Brain Res.	1996 Feb 19	709(2):275-84	x
8871587	Origin and functional consequences of the complex I defect in Parkinson's disease	Swerdlow RH1, Parks JK, Miller SW, Tuttle JB, Trimmer PA, Sheehan JP, Bennett JP Jr, Davis RE, Parker WD Jr.	Ann Neurol.	1996 Oct	40(4):663-71	Use of the cell line to create cybrids
8945752	In vitro assessment of neurotrophic activity from the striatum of aging rats	Kaseloo PA, Lis A, Asada H, Barone TA, Plunkett RJ.	Neurosci Lett.	1996 Nov 8	218(3):157-60.	x
9007048	R(-)-deprenyl potentiates dopamine-induced cytotoxicity toward catecholaminergic neuroblastoma SH-SY5Y cells	Lai CT, Yu PH.	Toxicol Appl Pharmacol.	1997 Jan	142(1):186-91.	x
9013604	Inhibition of p75 tumor necrosis factor receptor by antisense oligonucleotides increases hypoxic injury and beta-amyloid toxicity in human neuronal cell line	Shen Y, Li R, Shiosaki K.	J Biol Chem.	1997 Feb 7	272(6):3550-3.	Not PD specific
9065740	Dopamine- and L-beta-3,4-dihydroxyphenylalanine hydrochloride (L-Dopa)-induced cytotoxicity towards catecholaminergic neuroblastoma SH-SY5Y cells. Effects of oxidative stress and antioxidative factors	Lai CT, Yu PH.	Biochem Pharmacol.	1997 Feb 7	53(3):363-72.	x
9120428	N-methyl-(R)salsolinol as a dopaminergic neurotoxin: from an animal model to an early marker of Parkinson's disease	Naoi M, Maruyama W, Dostert P, Hashizume Y.	J Neural Transm Suppl.	1997	50:89-105.	Review
9202326	An endogenous dopaminergic neurotoxin, N-methyl-(R)-salsolinol, induces DNA damage in human dopaminergic neuroblastoma SH-SY5Y cells	Maruyama W, Naoi M, Kasamatsu T, Hashizume Y, Takahashi T, Kohda K, Dostert P.	J Neurochem.	1997 Jul	69(1):322-9.	x
9266415	Nigrostriatal neuronal death in Parkinson's disease--a passive or an active genetically-controlled process?	Ziv I1, Barzilai A, Offen D, Nardi N, Melamed E.	J Neural Transm Suppl.	1997	49:69-76	Not accessible
9299553	Adenovirus-mediated transduction with human glial cell line-derived neurotrophic factor gene prevents 1-methyl-4-phenyl-1,2,3,6-tetrahydropyridine-induced dopamine depletion in striatum of mouse brain	Kojima H, Abiru Y, Sakajiri K, Watabe K, Ohishi N, Takamori M, Hatanaka H, Yagi K.	Biochem Biophys Res Commun.	1997 Sep 18	238(2):569-73.	Use of condition medium of SH-SY5Y cells
9310301	A neurotoxin N-methyl(R)salsolinol induces apoptotic cell death in differentiated human dopaminergic neuroblastoma SH-SY5Y cells	Maruyama W, Benedetti MS, Takahashi T, Naoi M.	Neurosci Lett.	1997 Sep 5	232(3):147-50.	x
9434102	Elevated reactive oxygen species and antioxidant enzyme activities in animal and cellular models of Parkinson's disease	Cassarino DS, Fall CP, Swerdlow RH, Smith TS, Halvorsen EM, Miller SW, Parks JP, Parker WD Jr, Bennett JP Jr.	Biochim Biophys Acta.	1997 Nov 28	1362(1):77-86.	x
9448320	Improvement of neurological deficits in 6-hydroxydopamine-lesioned rats after transplantation with allogeneic simian virus 40 large tumor antigen gene-induced immortalized dopamine cells	Clarkson ED1, Rosa FG, Edwards-Prasad J, Weiland DA, Witta SE, Freed CR, Prasad KN.	Proc Natl Acad Sci U S A.	1998 Feb 3	95(3):1265-70	Neuroblastoma, not SH-SY5Y
9488718	Glyceraldehyde-3-phosphate dehydrogenase, the putative target of the antiapoptotic compounds CGP 3466 and R-(-)-deprenyl	Kragten E1, Lalande I, Zimmermann K, Roggo S, Schindler P, Muller D, van Oostrum J, Waldmeier P, Furst P.	J Biol Chem.	1998 Mar 6	273(10):5821-8	Neuroblastoma, not SH-SY5Y
9551854	N-acetyl-serotonin (normelatonin) and melatonin protect neurons against oxidative challenges and suppress the activity of the transcription factor NF-kappaB	Lezoualc'h F1, Sparapani M, Behl C.	J Pineal Res.	1998 Apr	24(3):168-78	Not PD specific
9564615	Oxidation of N-methyl(R)salsolinol: involvement to neurotoxicity and neuroprotection by endogenous catechol isoquinolines	Naoi M, Maruyama W, Kasamatsu T, Dostert P.	J Neural Transm Suppl.	1998	52:125-38.	Not accessible
9578138	Ascorbic acid stimulates DOPA synthesis and tyrosine hydroxylase gene expression in the human neuroblastoma cell line SK-N-SH	Seitz G1, Gebhardt S, Beck JF, Böhm W, Lode HN, Niethammer D, Bruchelt G.	Neurosci Lett.	1998 Mar 6	244(1):33-6	Neuroblastoma, not SH-SY5Y
9603216	(-)-Deprenyl protects human dopaminergic neuroblastoma SH-SY5Y cells from apoptosis induced by peroxynitrite and nitric oxide	Maruyama W, Takahashi T, Naoi M.	J Neurochem.	1998 Jun	70(6):2510-5.	x
9648878	Pramipexole reduces reactive oxygen species production in vivo and in vitro and inhibits the mitochondrial permeability transition produced by the parkinsonian neurotoxin methylpyridinium ion	Cassarino DS, Fall CP, Smith TS, Bennett JP Jr.	J Neurochem.	1998 Jul	71(1):295-301.	x
9704010	Secondary excitotoxicity contributes to dopamine-induced apoptosis of dopaminergic neuronal cultures	Zhang J1, Price JO, Graham DG, Montine TJ.	Biochem Biophys Res Commun.	1998 Jul 30	248(3):812-6	Neuroblastoma, not SH-SY5Y
9851431	Matrilineal inheritance of complex I dysfunction in a multigenerational Parkinson's disease family.	Swerdlow RH1, Parks JK, Davis JN 2nd, Cassarino DS, Trimmer PA, Currie LJ, Dougherty J, Bridges WS, Bennett JP Jr, Wooten GF, Parker WD.	Ann Neurol.	1998 Dec	44(6):873-81	Use of the cell line to create cybrids
9856280	Direct evidence for glutathione as mediator of apoptosis in neuronal cells.	Nicole A1, Santiard-Baron D, Ceballos-Picot I.	Biomed Pharmacother.	1998	52(9):349-55	Neuroblastoma, not SH-SY5Y
9862428	Aggregates from mutant and wild-type alpha-synuclein proteins and NAC peptide induce apoptotic cell death in human neuroblastoma cells by formation of beta-sheet and amyloid-like filaments	El-Agnaf OM, Jakes R, Curran MD, Middleton D, Ingenito R, Bianchi E, Pessi A, Neill D, Wallace A.	FEBS Lett.	1998 Nov 27	440(1-2):71-5.	x
9878181	Cerebrospinal fluid from L-dopa-treated Parkinson's disease patients is dystrophic for various neural cell types ex vivo: effects of astroglia	Colombo JA1, Napp MI.	Exp Neurol.	1998 Dec	154(2):452-63	Neuroblastoma, not SH-SY5Y
10082084	Characterization and time course of MPP+ -induced apoptosis in human SH-SY5Y neuroblastoma cells	Fall CP, Bennett JP Jr.	J Neurosci Res.	1999 Mar 1	55(5):620-8.	x
10227583	Neuroprotection by pramipexole against dopamine- and levodopa-induced cytotoxicity	Zou L1, Jankovic J, Rowe DB, Xie W, Appel SH, Le W.	Life Sci.	1999	64(15):1275-85	Neuroblastoma, not SH-SY5Y
10380999	Apoptosis induced by an endogenous neurotoxin, N-methyl(R)salsolinol, is mediated by activation of caspase 3	Akao Y, Nakagawa Y, Maruyama W, Takahashi T, Naoi M.	Neurosci Lett.	1999 Jun 4	267(3):153-6.	x
10388522	MPP+ inhibits proliferation of PC12 cells by a p21(WAF1/Cip1)-dependent pathway and induces cell death in cells lacking p21(WAF1/Cip1)	Soldner F, Weller M, Haid S, Beinroth S, Miller SW, WÃ¼llner U, Davis RE, Dichgans J, Klockgether T, Schulz JB.	Exp Cell Res.	1999 Jul 10	250(1):75-85.	x
10462574	Identification of MYCN Copy Number Heterogeneity by Direct FISH Analysis of Neuroblastoma Preparations	Squire JA1, Thorner P, Marrano P, Parkinson D, Ng YK, Gerrie B, Chilton-Macneill S, Zielenska M.	Mol Diagn.	1996 Dec	1(4):281-289	Parkinson as an author
10567343	Degradation of alpha-synuclein by proteasome	Bennett MC, Bishop JF, Leng Y, Chock PB, Chase TN, Mouradian MM.	J Biol Chem.	1999 Nov 26	274(48):33855-8.	x
10650131	1-Methyl-6,7-dihydroxy-1,2,3,4-tetrahydroisoquinoline (salsolinol) is toxic to dopaminergic neuroblastoma SH-SY5Y cells via impairment of cellular energy metabolism	Storch A, Kaftan A, Burkhardt K, Schwarz J.	Brain Res.	2000 Feb 7	855(1):67-75.	x
10656535	Cell death of dopamine neurons in aging and Parkinson's disease	Naoi M, Maruyama W.	Mech Ageing Dev.	1999 Nov	111(2-3):175-88.	x
10656536	Neuroprotection by (-)-deprenyl and related compounds	Maruyama W1, Naoi M.	Mech Ageing Dev.	1999 Nov	111(2-3):189-200	x
10666314	Proteasome inhibition in neuronal cells induces a proinflammatory response manifested by upregulation of cyclooxygenase-2, its accumulation as ubiquitin conjugates, and production of the prostaglandin PGE(2)	Rockwell P1, Yuan H, Magnusson R, Figueiredo-Pereira ME.	Arch Biochem Biophys.	2000 Feb 15	374(2):325-33	Not PD specific
10672322	alpha-Synuclein is expressed in a variety of brain tumors showing neuronal differentiation	Kawashima M1, Suzuki SO, Doh-ura K, Iwaki T.	Acta Neuropathol.	2000 Feb	99(2):154-60	Not PD specific
10683829	Pro-apoptotic effects of tau mutations in chromosome 17 frontotemporal dementia and parkinsonism	Furukawa K, D'Souza I, Crudder CH, Onodera H, Itoyama Y, Poorkaj P, Bird TD, Schellenberg GD.	Neuroreport.	2000 Jan 17	11(1):57-60.	x
10693927	Enhancement of dopaminergic neurotoxicity by the mercapturate of dopamine: relevance to Parkinson's disease	Zhang J1, Kravtsov V, Amarnath V, Picklo MJ, Graham DG, Montine TJ.	J Neurochem.	2000 Mar	74(3):970-8	Neuroblastoma, not SH-SY5Y
10716887	Abnormal mitochondrial morphology in sporadic Parkinson's and Alzheimer's disease cybrid cell lines	Trimmer PA, Swerdlow RH, Parks JK, Keeney P, Bennett JP Jr, Miller SW, Davis RE, Parker WD Jr.	Exp Neurol.	2000 Mar	162(1):37-50.	Use of the cell line to create cybrids
10737593	Interaction among mitochondria, mitogen-activated protein kinases, and nuclear factor-kappaB in cellular models of Parkinson's disease	Cassarino DS, Halvorsen EM, Swerdlow RH, Abramova NN, Parker WD Jr, Sturgill TW, Bennett JP Jr.	J Neurochem.	2000 Apr	74(4):1384-92.	x
10759066	Neuronal nicotinic receptors in the human brain	Paterson D1, Nordberg A.	Prog Neurobiol.	2000 May	61(1):75-111	Review
10771134	The probable involvement of soluble and deposited melanins, their intermediates and the reactive oxygen side-products in human diseases and aging	Hegedus ZL1.	Toxicology.	2000 Apr 14	145(2-3):85-101	Not PD specific
10784133	Vasoactive intestinal peptide (VIP) prevents neurotoxicity in neuronal cultures: relevance to neuroprotection in Parkinson's disease	Offen D, Sherki Y, Melamed E, Fridkin M, Brenneman DE, Gozes I.	Brain Res.	2000 Jan 31	854(1-2):257-62.	x
10799657	Protective effect of L-deprenyl against apoptosis induced by okadaic acid in cultured neuronal cells	Suuronen T1, Kolehmainen P, Salminen A.	Biochem Pharmacol.	2000 Jun 15	59(12):1589-95	Not PD specific
10799759	Enhanced vulnerability to oxidative stress by alpha-synuclein mutations and C-terminal truncation	Kanda S, Bishop JF, Eglitis MA, Yang Y, Mouradian MM.	Neuroscience.	2000	97(2):279-84.	x
10811228	Improved gene transfer to neuroblastoma cells by a monoclonal antibody targeting RET, a receptor tyrosine kinase	Yano L1, Shimura M, Taniguchi M, Hayashi Y, Suzuki T, Hatake K, Takaku F, Ishizaka Y.	Hum Gene Ther.	2000 May 1	11(7):995-1004	Not PD specific
10821437	6-Hydroxydopamine toxicity towards human SH-SY5Y dopaminergic neuroblastoma cells: independent of mitochondrial energy metabolism	Storch A, Kaftan A, Burkhardt K, Schwarz J.	J Neural Transm (Vienna).	2000	107(3):281-93.	x
10934254	The A53T alpha-synuclein mutation increases iron-dependent aggregation and toxicity	Ostrerova-Golts N1, Petrucelli L, Hardy J, Lee JM, Farer M, Wolozin B.	J Neurosci.	2000 Aug 15	20(16):6048-54	Neuroblastoma, not SH-SY5Y
10958869	Enzymatic dopamine peroxidation in substantia nigra of human brain	Galzigna L1, De Iuliis A, Zanatta L.	Clin Chim Acta.	2000 Oct	300(1-2):131-8	Neuroblastoma, not SH-SY5Y
10964495	MPP(+) increases the vulnerability to oxidative stress rather than directly mediating oxidative damage in human neuroblastoma cells	Lee HS, Park CW, Kim YS.	Exp Neurol.	2000 Sep	165(1):164-71.	x
10972966	Disrupted mitochondrial electron transport function increases expression of anti-apoptotic bcl-2 and bcl-X(L) proteins in SH-SY5Y neuroblastoma and in Parkinson disease cybrid cells through oxidative stress	Veech GA, Dennis J, Keeney PM, Fall CP, Swerdlow RH, Parker WD Jr, Bennett JP Jr.	J Neurosci Res.	2000 Sep 15	61(6):693-700.	Not accessible
10976934	Parkin is metabolized by the ubiquitin/proteosome system	Choi P1, Ostrerova-Golts N, Sparkman D, Cochran E, Lee JM, Wolozin B.	Neuroreport.	2000 Aug 21	11(12):2635-8	Neuroblastoma, not SH-SY5Y
10978581	Dopaminergic neurotoxins, 6,7-dihydroxy-1-(3', 4'-dihydroxybenzyl)-isoquinolines, cause different types of cell death in SH-SY5Y cells: apoptosis was induced by oxidized papaverolines and necrosis by reduced tetrahydropapaverolines	Maruyama W, Sango K, Iwasa K, Minami C, Dostert P, Kawai M, Moriyasu M, Naoi M.	Neurosci Lett.	2000 Sep 15	291(2):89-92.	x
10996018	Mechanism underlying anti-apoptotic activity of a (-)deprenyl-related propargylamine, rasagiline	Maruyama W, Yamamoto T, Kitani K, Carrillo MC, Youdim M, Naoi M.	Mech Ageing Dev.	2000 Jul 31	116(2-3):181-91.	x
11008879	Anti-apoptotic function of L-(-)deprenyl (Selegiline) and related compounds	Naoi M, Maruyama W, Yagi K, Youdim M.	Neurobiology (Bp).	2000	8(1):69-80.	Not accessible
11080177	Protective effects of riluzole on dopamine neurons: involvement of oxidative stress and cellular energy metabolism	Storch A, Burkhardt K, Ludolph AC, Schwarz J.	J Neurochem.	2000 Dec	75(6):2259-69.	x
11085911	R-(-)-Deprenyl inhibits monocytic THP-1 cell neurotoxicity independently of monoamine oxidase inhibition	Klegeris A, McGeer PL.	Exp Neurol.	2000 Dec	166(2):458-64.	Not PD specific
11090952	Apoptosis induced by an endogenous neurotoxin, N-methyl(R)salsolinol, in dopamine neurons	Naoi M, Maruyama W, Akao Y, Zhang J, Parvez H.	Toxicology.	2000 Nov 16	153(1-3):123-41.	x
11128601	Involvement of endogenous N-methyl(R)salsolinol in Parkinson's disease: induction of apoptosis and protection by (-)deprenyl	Naoi M, Maruyama W, Takahashi T, Akao Y, Nakagawa Y.	J Neural Transm Suppl.	2000	(58):111-21.	Not accessible
11128615	Iron chelating, antioxidant and cytoprotective properties of dopamine receptor agonist; apomorphine	Youdim MB1, Gassen M, Gross A, Mandel S, Grünblatt E.	J Neural Transm Suppl.	2000	(58):83-96	Not accessible
11145996	N-acetyl-L-cysteine protects SHSY5Y neuroblastoma cells from oxidative stress and cell cytotoxicity: effects on beta-amyloid secretion and tau phosphorylation	Olivieri G1, Baysang G, Meier F, Müller-Spahn F, Stähelin HB, Brockhaus M, Brack C.	J Neurochem.	2001 Jan	76(1):224-33	Not PD specific
11164812	Chronic reduction in complex I function alters calcium signaling in SH-SY5Y neuroblastoma cells	Sherer TB, Trimmer PA, Borland K, Parks JK, Bennett JP Jr, Tuttle JB.	Brain Res.	2001 Feb 9	891(1-2):94-105.	x
11181819	Effect of the overexpression of wild-type or mutant alpha-synuclein on cell susceptibility to insult.	Lee M1, Hyun D, Halliwell B, Jenner P.	J Neurochem.	2001 Feb	76(4):998-1009	Neuroblastoma, not SH-SY5Y
11188501	[Studies on endogenous toxins as pathogenic factors in idiopathic parkinson's disease]	Maruyama W, Naoi M.	Nihon Yakurigaku Zasshi.	2000 Dec	116(6):333-42.	Not accessible; review; japanese.
11193138	Pathological tau phenotypes. The weight of mutations, polymorphisms, and differential neuronal vulnerabilities	Mailliot C1, Bussière T, Hamdane M, Sergeant N, Caillet ML, Delacourte A, Buée L.	Ann N Y Acad Sci.	2000	920:107-14	Not PD specific
11205138	Neurotoxins induce apoptosis in dopamine neurons: protection by N-propargylamine-1(R)- and (S)-aminoindan, rasagiline and TV1022	Maruyama W, Akao Y, Youdim MB, Naoi M.	J Neural Transm Suppl.	2000	(60):171-86.	Not accessible
11205140	Neurorescuing effects of the GAPDH ligand CGP 3466B	Waldmeier PC1, Boulton AA, Cools AR, Kato AC, Tatton WG.	J Neural Transm Suppl.	2000	(60):197-214	Neuroblastoma, not SH-SY5Y
11223917	Low concentrations of 1-methyl-4-phenylpyridinium ion induce caspase-mediated apoptosis in human SH-SY5Y neuroblastoma cells	GÃ³mez C, Reiriz J, PiquÃ© M, Gil J, Ferrer I, Ambrosio S.	J Neurosci Res.	2001 Mar 1	63(5):421-8.	x
11279282	Rescue from death but not from functional impairment: caspase inhibition protects dopaminergic cells against 6-hydroxydopamine-induced apoptosis but not against the loss of their terminals	von Coelln R, KÃ¼gler S, BÃ¤hr M, Weller M, Dichgans J, Schulz JB.	J Neurochem.	2001 Apr	77(1):263-73.	x
11290879	Catechol-O-methyltransferase decreases levodopa toxicity in vitro	Offen D1, Panet H, Galili-Mosberg R, Melamed E.	Clin Neuropharmacol.	2001 Jan-Feb	24(1):27-30	Neuroblastoma, unkown type
11311793	Inhibition of 6-hydroxydopamine-induced p53 expression and survival of neuroblastoma cells following interaction with astrocytes	Tieu K, Ashe PC, Zuo DM, Yu PH.	Neuroscience.	2001	103(1):125-32.	x
11358461	Biochemical analysis of cybrids expressing mitochondrial DNA from Contursi kindred Parkinson's subjects	Swerdlow RH1, Parks JK, Cassarino DS, Binder DR, Bennett JP Jr, Di Iorio G, Golbe LI, Parker WD Jr.	Exp Neurol.	2001 Jun	169(2):479-85	Use of the cell line to create cybrids
11406316	Decreased expression of the NADH:ubiquinone oxidoreductase (complex I) subunit 4 in 1-methyl-4-phenylpyridinium -treated human neuroblastoma SH-SY5Y cells.	Conn KJ, Ullman MD, Eisenhauer PB, Fine RE, Wells JM.	Neurosci Lett.	2001 Jun 29	306(3):145-8.	x
11437990	Ubiquitin C-terminal hydrolase-L1 (PGP9.5) expression in human neural cell lines following induction of neuronal differentiation and exposure to cytokines, neurotrophic factors or heat stress	Satoh JI1, Kuroda Y.	Neuropathol Appl Neurobiol.	2001 Apr	27(2):95-104	Neuroblastoma, not SH-SY5Y
11461973	Apoptotic signaling in dopamine-induced cell death: the role of oxidative stress, p38 mitogen-activated protein kinase, cytochrome c and caspases	Junn E, Mouradian MM.	J Neurochem.	2001 Jul	78(2):374-83.	x
11462787	Antiapoptotic properties of rasagiline, N-propargylamine-1(R)-aminoindan, and its optical (S)-isomer, TV1022	Maruyama W, Youdim MB, Naoi M.	Ann N Y Acad Sci.	2001 Jun	939:320-9.	x
11489679	Future of neuroprotection in Parkinson's disease	Naoi M, Maruyama W.	Parkinsonism Relat Disord.	2001 Oct	8(2):139-45.	x
11504916	Gene transfer of the JNK interacting protein-1 protects dopaminergic neurons in the MPTP model of Parkinson's disease	Xia XG, Harding T, Weller M, Bieneman A, Uney JB, Schulz JB.	Proc Natl Acad Sci U S A.	2001 Aug 28	98(18):10433-8.	x
11520893	Transfection-enforced Bcl-2 overexpression and an anti-Parkinson drug, rasagiline, prevent nuclear accumulation of glyceraldehyde-3-phosphate dehydrogenase induced by an endogenous dopaminergic neurotoxin, N-methyl(R)salsolinol	Maruyama W, Akao Y, Youdim MB, Davis BA, Naoi M.	J Neurochem.	2001 Aug	78(4):727-35.	x
11532426	Extensive neuronal localization and neurotrophic function of fibroblast growth factor 8 in the nervous system	Tanaka A1, Kamiakito T, Hakamata Y, Fujii A, Kuriki K, Fukayama M.	Brain Res.	2001 Sep 7	912(2):105-15	Neuroblastoma, not SH-SY5Y
11553688	Identification and characterization of the human parkin gene promoter	West A, Farrer M, Petrucelli L, Cookson M, Lockhart P, Hardy J.	J Neurochem.	2001 Sep	78(5):1146-52.	x
11578751	The molecular bases of Alzheimer's disease and other neurodegenerative disorders.	Maccioni RB1, Muñoz JP, Barbeito L.	Arch Med Res.	2001 Sep-Oct	32(5):367-81	Review
11689167	Caspase-3 activation induced by inhibition of mitochondrial complex I is facilitated by glycogen synthase kinase-3beta and attenuated by lithium	King TD, Bijur GN, Jope RS.	Brain Res.	2001 Nov 16	919(1):106-14.	x
11711873	A novel mechanism of dopamine neurotoxicity involving the peripheral extracellular and the plasma membrane dopamine transporter	Liu Z1, Zhang J, Fei J, Guo L.	Neuroreport.	2001 Oct 29	12(15):3293-7	Not PD specific
11734199	alpha-synuclein metabolism and aggregation is linked to ubiquitin-independent degradation by the proteasome	Tofaris GK, Layfield R, Spillantini MG.	FEBS Lett.	2001 Nov 30	509(1):22-6.	x
11738505	Tau proteins with frontotemporal dementia-17 mutations have both altered expression levels and phosphorylation profiles in differentiated neuroblastoma cells	Mack TG1, Dayanandan R, Van Slegtenhorst M, Whone A, Hutton M, Lovestone S, Anderton BH.	Neuroscience.	2001	108(4):701-12	Not PD specific
11744219	Protective effect of insulin-like-growth-factor-1 against dopamine-induced neurotoxicity in human and rodent neuronal cultures: possible implications for Parkinson's disease.	Offen D1, Shtaif B, Hadad D, Weizman A, Melamed E, Gil-Ad I.	Neurosci Lett.	2001 Dec 28	316(3):129-32	Neuroblastoma, not SH-SY5Y
11751692	Effect of allelic variation at the NACP-Rep1 repeat upstream of the alpha-synuclein gene (SNCA) on transcription in a cell culture luciferase reporter system	Chiba-Falek O, Nussbaum RL.	Hum Mol Genet.	2001 Dec 15	10(26):3101-9.	x
11754089	Resistance of the insect cell line IPLB-LdFB to salsolinol-induced apoptosis	Ottaviani E1, Nappi AJ, Vass E.	Arch Insect Biochem Physiol.	2002 Jan	49(1):1-9	Neuroblastoma used on other studies
11754870	Attenuation of 6-hydroxydopamine (6-OHDA)-induced nuclear factor-kappaB (NF-kappaB) activation and cell death by tea extracts in neuronal cultures	Levites Y, Youdim MB, Maor G, Mandel S.	Biochem Pharmacol.	2002 Jan 1	63(1):21-9.	x
11755160	Pergolide protects SH-SY5Y cells against neurodegeneration induced by H(2)O(2)	Uberti D, Piccioni L, Colzi A, Bravi D, Canonico PL, Memo M.	Eur J Pharmacol.	2002 Jan 2	434(1-2):17-20.	x
11835316	Inhibition by R(+) or S(-) pramipexole of caspase activation and cell death induced by methylpyridinium ion or beta amyloid peptide in SH-SY5Y neuroblastoma	Abramova NA, Cassarino DS, Khan SM, Painter TW, Bennett JP Jr.	J Neurosci Res.	2002 Feb 15	67(4):494-500.	x
11839750	Caspase-mediated parkin cleavage in apoptotic cell death	Kahns S, Lykkebo S, Jakobsen LD, Nielsen MS, Jensen PH.	J Biol Chem.	2002 May 3	277(18):15303-8.	x
11852183	Human alpha-synuclein over-expression increases intracellular reactive oxygen species levels and susceptibility to dopamine	Junn E, Mouradian MM.	Neurosci Lett.	2002 Mar 8	320(3):146-50.	x
11872249	Glyceraldehyde-3-phospate dehydrogenase is translocated into nuclei through Golgi apparatus during apoptosis induced by 6-hydroxydopamine in human dopaminergic SH-SY5Y cells	Maruyama W, Oya-Ito T, Shamoto-Nagai M, Osawa T, Naoi M.	Neurosci Lett.	2002 Mar 15	321(1-2):29-32.	x
11872740	Coaggregation, cointernalization, and codesensitization of adenosine A2A receptors and dopamine D2 receptors	Hillion J, Canals M, Torvinen M, Casado V, Scott R, Terasmaa A, Hansson A, Watson S, Olah ME, Mallol J, Canela EI, Zoli M, Agnati LF, Ibanez CF, Lluis C, Franco R, Ferre S, Fuxe K.	J Biol Chem.	2002 May 17	277(20):18091-7.	Not PD specific
11911843	Selective dopaminergic neurotoxicity of isoquinoline derivatives related to Parkinson's disease: studies using heterologous expression systems of the dopamine transporter	Storch A1, Ott S, Hwang YI, Ortmann R, Hein A, Frenzel S, Matsubara K, Ohta S, Wolf HU, Schwarz J.	Biochem Pharmacol.	2002 Mar 1	63(5):909-20	Neuroblastoma, not SH-SY5Y
11930634	[Human GDNF cDNA-engineered SH-SY5Y cells' neurotrophic and protective effect on primary dopaminergic neurons of rat]	Zhang W, Wang X, Yang Y.	Zhonghua Yi Xue Za Zhi.	2001 Nov 25	81(22):1384-6.	Chinese
11956966	The anti-Parkinson drug, rasagiline, prevents apoptotic DNA damage induced by peroxynitrite in human dopaminergic neuroblastoma SH-SY5Y cells	Maruyama W, Takahashi T, Youdim M, Naoi M.	J Neural Transm (Vienna).	2002 Apr	109(4):467-81.	x
12009755	Distinct nuclear and cytoplasmic localization of caspase cleavage products in two models of induced apoptotic death in dopamine neurons of the substantia nigra	Oo TF1, Siman R, Burke RE.	Exp Neurol.	2002 May	175(1):1-9	SH-SY5Y used for antibody testing (caspase cleaved sequence)
12043833	Molecular basis of neuroprotective activities of rasagiline and the anti-Alzheimer drug TV3326 [(N-propargyl-(3R)aminoindan-5-YL)-ethyl methyl carbamate]	Youdim MB, Weinstock M.	Cell Mol Neurobiol.	2001 Dec	21(6):555-73.	Not accessible; Review
12043847	6-Hydroxydopamine increases ubiquitin-conjugates and protein degradation: implications for the pathogenesis of Parkinson's disease	Elkon H, Melamed E, Offen D.	Cell Mol Neurobiol.	2001 Dec	21(6):771-81.	x
12057839	An anti-Parkinson's disease drug, N-propargyl-1(R)-aminoindan (rasagiline), enhances expression of anti-apoptotic bcl-2 in human dopaminergic SH-SY5Y cells	Akao Y, Maruyama W, Yi H, Shamoto-Nagai M, Youdim MB, Naoi M.	Neurosci Lett.	2002 Jun 28	326(2):105-8.	x
12058035	Involvement of protein kinase C activation and cell survival/ cell cycle genes in green tea polyphenol (-)-epigallocatechin 3-gallate neuroprotective action	Levites Y, Amit T, Youdim MB, Mandel S.	J Biol Chem.	2002 Aug 23	277(34):30574-80.	x
12059041	Mutant and wild-type alpha-synuclein interact with mitochondrial cytochrome C oxidase	Elkon H, Don J, Melamed E, Ziv I, Shirvan A, Offen D.	J Mol Neurosci.	2002 Jun	18(3):229-38.	x
12062470	MPP+ increases alpha-synuclein expression and ERK/MAP-kinase phosphorylation in human neuroblastoma SH-SY5Y cells	GÃ³mez-Santos C, Ferrer I, Reiriz J, ViÃ±als F, Barrachina M, Ambrosio S.	Brain Res.	2002 May 10	935(1-2):32-9.	x
12070143	Non-steroidal anti-inflammatory drugs stimulate secretion of non-amyloidogenic precursor protein	Avramovich Y, Amit T, Youdim MB.	J Biol Chem.	2002 Aug 30	277(35):31466-73.	Not PD specific
12106111	Behavioural Effect of Engineered Cells that Synthesize l-dopa or Dopamine after Grafting into the Rat Neostriatum	Horellou P1, Marlier L, Privat A, Mallet J.	Eur J Neurosci.	1990 Jan	2(1):116-119	Neuroblastoma, not SH-SY5Y
12111453	Mitochondria determine the survival and death in apoptosis by an endogenous neurotoxin, N-methyl(R)salsolinol, and neuroprotection by propargylamines	Naoi M, Maruyama W, Akao Y, Yi H.	J Neural Transm (Vienna).	2002 May	109(5-6):607-21.	x
12133510	Intracerebral transplantation of nerve cells and genetically modified cells for disorders of central nervous system, a basic and clinical study	Wu C1, Liu Y, Wang J, Yang Y, Jiang Y.	Zhonghua Yi Xue Za Zhi.	2002 Apr 10	82(7):440-4	Chinese
12177198	An in vitro model of Parkinson's disease: linking mitochondrial impairment to altered alpha-synuclein metabolism and oxidative damage	Sherer TB1, Betarbet R, Stout AK, Lund S, Baptista M, Panov AV, Cookson MR, Greenamyre JT.	J Neurosci.	2002 Aug 15	22(16):7006-15	Neuroblastoma, not SH-SY5Y
12182891	The effects of beta-estradiol on SHSY5Y neuroblastoma cells during heavy metal induced oxidative stress, neurotoxicity and beta-amyloid secretion	Olivieri G1, Novakovic M, Savaskan E, Meier F, Baysang G, Brockhaus M, Müller-Spahn F.	Neuroscience.	2002	113(4):849-55	Not PD specific
12200189	Dopamine-derived endogenous N-methyl-(R)-salsolinol: its role in Parkinson's disease	Naoi M, Maruyama W, Akao Y, Yi H.	Neurotoxicol Teratol.	2002 Sep-Oct	24(5):579-91.	Review
12200191	Apoptotic molecules and MPTP-induced cell death	Nicotra A, Parvez S.	Neurotoxicol Teratol.	2002 Sep-Oct	24(5):599-605.	Review
12200198	Neuroprotection by propargylamines in Parkinson's disease: suppression of apoptosis and induction of prosurvival genes	Maruyama W, Akao Y, Carrillo MC, Kitani K, Youdium MB, Naoi M.	Neurotoxicol Teratol.	2002 Sep-Oct	24(5):675-82.	Review
12210849	Activation of adenosine triphosphate-sensitive potassium channels confers protection against rotenone-induced cell death: therapeutic implications for Parkinson's disease	Tai KK, Truong DD.	J Neurosci Res.	2002 Aug 15	69(4):559-66.	x
12358797	Mitochondrial permeability transition mediates apoptosis induced by N-methyl(R)salsolinol, an endogenous neurotoxin, and is inhibited by Bcl-2 and rasagiline, N-propargyl-1(R)-aminoindan	Akao Y, Maruyama W, Shimizu S, Yi H, Nakagawa Y, Shamoto-Nagai M, Youdim MB, Tsujimoto Y, Naoi M.	J Neurochem.	2002 Aug	82(4):913-23.	x
12363409	Methylpyridinium (MPP(+))- and nerve growth factor-induced changes in pro- and anti-apoptotic signaling pathways in SH-SY5Y neuroblastoma cells	Halvorsen EM, Dennis J, Keeney P, Sturgill TW, Tuttle JB, Bennett JB Jr.	Brain Res.	2002 Oct 11	952(1):98-110.	x
12375057	Cell death in Parkinson's disease	Maruyama W1, Naoi M.	J Neurol.	2002 Sep	249 Suppl 2:II6-10	x
12392782	Cyclooxygenase and 5-lipoxygenase inhibitors protect against mononuclear phagocyte neurotoxicity	Klegeris A, McGeer PL.	Neurobiol Aging.	2002 Sep-Oct	23(5):787-94.	Not PD specific
12401552	Possible involvement of both mitochondria- and endoplasmic reticulum-dependent caspase pathways in rotenone-induced apoptosis in human neuroblastoma SH-SY5Y cells	Kitamura Y, Inden M, Miyamura A, Kakimura J, Taniguchi T, Shimohama S.	Neurosci Lett.	2002 Nov 15	333(1):25-8.	x
12401952	Deferoxamine attenuates iron-induced oxidative stress and prevents mitochondrial aggregation and alpha-synuclein translocation in SK-N-SH cells in culture	Sangchot P1, Sharma S, Chetsawang B, Porter J, Govitrapong P, Ebadi M.	Dev Neurosci.	2002	24(2-3):143-53	Neuroblastoma, not SH-SY5Y
12415119	Down-regulation of parkin protein in transient focal cerebral ischemia: A link between stroke and degenerative disease?	Mengesdorf T1, Jensen PH, Mies G, Aufenberg C, Paschen W.	Proc Natl Acad Sci U S A.	2002 Nov 12	99(23):15042-7	Neuroblastoma used on other studies
12423244	Synphilin-1 degradation by the ubiquitin-proteasome pathway and effects on cell survival.	Lee G1, Junn E, Tanaka M, Kim YM, Mouradian MM.	J Neurochem.	2002 Oct	83(2):346-52	Neuroblastoma, not SH-SY5Y
12437580	Prostaglandin A1 inhibits rotenone-induced apoptosis in SH-SY5Y cells	Wang X, Qin ZH, Leng Y, Wang Y, Jin X, Chase TN, Bennett MC.	J Neurochem.	2002 Dec	83(5):1094-102.	x
12464354	Cabergoline prevents necrotic neuronal death in an in vitro model of oxidative stress	Lombardi G, Varsaldi F, Miglio G, Papini MG, Battaglia A, Canonico PL.	Eur J Pharmacol.	2002 Dec 20	457(2-3):95-8.	x
12515313	Activation of phospholipases A2 and D of a human neuroblastoma cell line (LA-N-2) by N-dodecyl-L-lysine amide (compound 24), a putative G protein activator: characteristics of inhibition by (-)-nicotine.	Garnham BM1, Fitzpatrick-Wong S, Schunack W, Nürnberg B, Sorrentino G, Parkinson FE, Kanfer JN, Sitar DS.	Neurochem Res.	2002 Dec	27(12):1613-8	Parkinson as an author
12523938	1-Methyl-4-phenylpyridinium (MPP+)-induced apoptosis and mitochondrial oxidant generation: role of transferrin-receptor-dependent iron and hydrogen peroxide	Kalivendi SV, Kotamraju S, Cunningham S, Shang T, Hillard CJ, Kalyanaraman B.	Biochem J.	2003 Apr 1	371(Pt 1):151-64.	x
12527392	Pyruvic acid cytoprotection against 1-methyl-4-phenylpyridinium, 6-hydroxydopamine and hydrogen peroxide toxicities in vitro.	Mazzio E1, Soliman KF.	Neurosci Lett.	2003 Feb 6	337(2):77-80	Neuroblastoma, not SH-SY5Y
12531188	Ca2+/calmodulin-dependent translocation of sphingosine kinase: role in plasma membrane relocation but not activation	Young KW, Willets JM, Parkinson MJ, Bartlett P, Spiegel S, Nahorski SR, Challiss RA.	Cell Calcium.	2003 Feb	33(2):119-28.	Parkinson as an author
12541013	Polymorphisms of the alpha-synuclein promoter: expression analyses and association studies in Parkinson's disease.	Holzmann C1, Krüger R, Saecker AM, Schmitt I, Schöls L, Berger K, Riess O.	J Neural Transm (Vienna).	2003 Jan	110(1):67-76	Neuroblastoma, not SH-SY5Y
12551928	Aggregated and monomeric alpha-synuclein bind to the S6' proteasomal protein and inhibit proteasomal function.	Snyder H1, Mensah K, Theisler C, Lee J, Matouschek A, Wolozin B.	J Biol Chem.	2003 Apr 4	278(14):11753-9	Neuroblastoma, not SH-SY5Y
12564389	The role of glycolysis and gluconeogenesis in the cytoprotection of neuroblastoma cells against 1-methyl 4-phenylpyridinium ion toxicity.	Mazzio E1, Soliman KF.	Neurotoxicology.	2003 Jan	24(1):137-47	Neuroblastoma, not SH-SY5Y
12618015	Inverse Genomics as a powerful tool to identify novel targets for the treatment of neurodegenerative diseases.	Rhoades K1, Wong-Staal F.	Mech Ageing Dev.	2003 Jan	124(1):125-32	Not PD specific
12626434	cDNA gene expression profile homology of antioxidants and their antiapoptotic and proapoptotic activities in human neuroblastoma cells.	Weinreb O1, Mandel S, Youdim MB.	FASEB J.	2003 May	17(8):935-7	x
12668241	Insulin-like growth factor-1 protects human dopaminergic SH-SY5Y cells from salsolinol-induced toxicity	Shavali S, Ren J, Ebadi M.	Neurosci Lett.	2003 Apr 10	340(2):79-82.	x
12670874	Neuroprotection and neurorescue against Abeta toxicity and PKC-dependent release of nonamyloidogenic soluble precursor protein by green tea polyphenol (-)-epigallocatechin-3-gallate	Levites Y, Amit T, Mandel S, Youdim MB.	FASEB J.	2003 May	17(8):952-4.	Not PD specific
12686385	Parkin is not regulated by the unfolded protein response in human neuroblastoma cells	West AB, Gonzalez-de-Chavez F, Wilkes K, O'Farrell C, Farrer MJ.	Neurosci Lett.	2003 May 1	341(2):139-42.	x
12697291	Anti-apoptotic action of anti-Alzheimer drug, TV3326 [(N-propargyl)-(3R)-aminoindan-5-yl]-ethyl methyl carbamate, a novel cholinesterase-monoamine oxidase inhibitor	Maruyama W, Weinstock M, Youdim MB, Nagai M, Naoi M.	Neurosci Lett.	2003 May 8	341(3):233-6.	x
12710931	Dependence on electron transport chain function and intracellular signaling of genomic responses in SH-SY5Y cells to the mitochondrial neurotoxin MPP(+)	Brill LB 2nd, Bennett JP Jr.	Exp Neurol.	2003 May	181(1):25-38.	x
12716024	Cytoprotection of pyruvic acid and reduced beta-nicotinamide adenine dinucleotide against hydrogen peroxide toxicity in neuroblastoma cells.	Mazzio EA1, Soliman KF.	Neurochem Res.	2003 May	28(5):733-41	Not PD specific
12716427	Co-ordinate transcriptional regulation of dopamine synthesis genes by alpha-synuclein in human neuroblastoma cell lines.	Baptista MJ1, O'Farrell C, Daya S, Ahmad R, Miller DW, Hardy J, Farrer MJ, Cookson MR.	J Neurochem.	2003 May	85(4):957-68	Neuroblastoma, not SH-SY5Y
12716939	Parkin binds to alpha/beta tubulin and increases their ubiquitination and degradation.	Ren Y1, Zhao J, Feng J.	J Neurosci.	2003 Apr 15	23(8):3316-24	x
12727333	Differential cytotoxicity of dopamine and H2O2 in a human neuroblastoma divided cell line transfected with alpha-synuclein and its familial Parkinson's disease-linked mutants.	Wersinger C1, Sidhu A.	Neurosci Lett.	2003 May 15	342(1-2):124-8	Neuroblastoma, not SH-SY5Y
12761037	Identification and functional characterization of a novel R621C mutation in the synphilin-1 gene in Parkinson's disease	Marx FP, Holzmann C, Strauss KM, Li L, Eberhardt O, Gerhardt E, Cookson MR, Hernandez D, Farrer MJ, Kachergus J, Engelender S, Ross CA, Berger K, SchÃls L, Schulz JB, Riess O, KrÃ¼ger R.	Hum Mol Genet.	2003 Jun 1	12(11):1223-31.	x
12782106	1-Benzyl-1,2,3,4-tetrahydroisoquinoline (1BnTIQ), an endogenous neurotoxin, induces dopaminergic cell death through apoptosis	Shavali S, Ebadi M.	Neurotoxicology.	2003 Jun	24(3):417-24.	x
12783850	The p38 subunit of the aminoacyl-tRNA synthetase complex is a Parkin substrate: linking protein biosynthesis and neurodegeneration	Corti O, Hampe C, Koutnikova H, Darios F, Jacquier S, Prigent A, Robinson JC, Pradier L, Ruberg M, Mirande M, Hirsch E, Rooney T, Fournier A, Brice A.	Hum Mol Genet.	2003 Jun 15	12(12):1427-37.	x
12787066	Alpha-synuclein up-regulates expression of caveolin-1 and down-regulates extracellular signal-regulated kinase activity in B103 neuroblastoma cells: role in the pathogenesis of Parkinson's disease.	Hashimoto M1, Takenouchi T, Rockenstein E, Masliah E.	J Neurochem.	2003 Jun	85(6):1468-79	Neuroblastoma, not SH-SY5Y
12787326	Pathological inclusion bodies in tauopathies contain distinct complements of tau with three or four microtubule-binding repeat domains as demonstrated by new specific monoclonal antibodies.	de Silva R1, Lashley T, Gibb G, Hanger D, Hope A, Reid A, Bandopadhyay R, Utton M, Strand C, Jowett T, Khan N, Anderton B, Wood N, Holton J, Revesz T, Lees A.	Neuropathol Appl Neurobiol.	2003 Jun	29(3):288-302	Not PD specific
12807434	Dopamine-dependent cytotoxicity of tetrahydrobiopterin: a possible mechanism for selective neurodegeneration in Parkinson's disease.	Choi HJ1, Kim SW, Lee SY, Hwang O.	J Neurochem.	2003 Jul	86(1):143-52	Neuroblastoma, not SH-SY5Y
12832036	PI3K is a key molecule in the Nrf2-mediated regulation of antioxidative proteins by hemin in human neuroblastoma cells	Nakaso K, Yano H, Fukuhara Y, Takeshima T, Wada-Isoe K, Nakashima K.	FEBS Lett.	2003 Jul 10	546(2-3):181-4.	x
12853328	Gene and protein expression profiles of anti- and pro-apoptotic actions of dopamine, R-apomorphine, green tea polyphenol (-)-epigallocatechine-3-gallate, and melatonin	Weinreb O, Mandel S, Youdim MB.	Ann N Y Acad Sci.	2003 May	993:351-61	x
12853332	Amyloid processing and signal transduction properties of antiparkinson-antialzheimer neuroprotective drugs rasagiline and TV3326	Youdim MB, Amit T, Bar-Am O, Weinstock M, Yogev-Falach M.	Ann N Y Acad Sci.	2003 May	993:378-86	Not PD specific
12860476	Effect of fraxetin and myricetin on rotenone-induced cytotoxicity in SH-SY5Y cells: comparison with N-acetylcysteine	Molina-Jimenez MF, Sanchez-Reus MI, Benedi J.	Eur J Pharmacol.	2003 Jul 4	472(1-2):81-7.	x
12868068	Dopamine induces autophagic cell death and alpha-synuclein increase in human neuroblastoma SH-SY5Y cells	GÃ³mez-Santos C, Ferrer I, SantidriÃ¡n AF, Barrachina M, Gil J, Ambrosio S.	J Neurosci Res.	2003 Aug 1	73(3):341-50.	x
12871590	Characterization of chronic low-level proteasome inhibition on neural homeostasis	Ding Q, Dimayuga E, Martin S, Bruce-Keller AJ, Nukala V, Cuervo AM, Keller JN.	J Neurochem.	2003 Jul	86(2):489-97.	Not PD specific
12923682	Functional analysis of intra-allelic variation at NACP-Rep1 in the alpha-synuclein gene	Chiba-Falek O, Touchman JW, Nussbaum RL.	Hum Genet.	2003 Oct	113(5):426-31.	x
12928331	Parkin is recruited to the centrosome in response to inhibition of proteasomes	Zhao J, Ren Y, Jiang Q, Feng J.	J Cell Sci.	2003 Oct 1	116(Pt 19):4011-9.	x
12946025	Neuropathology and neurodegeneration in rodent brain induced by lentiviral vector-mediated overexpression of alpha-synuclein.	Lauwers E1, Debyser Z, Van Dorpe J, De Strooper B, Nuttin B, Baekelandt V.	Brain Pathol.	2003 Jul	13(3):364-72	Neuroblastoma, not SH-SY5Y
12963044	Parkin suppresses wild-type alpha-synuclein-induced toxicity in SHSY-5Y cells	Oluwatosin-Chigbu Y1, Robbins A, Scott CW, Arriza JL, Reid JD, Zysk JR.	Biochem Biophys Res Commun.	2003 Sep 26	309(3):679-84	x
14519670	Alpha-synuclein implicated in Parkinson's disease is present in extracellular biological fluids, including human plasma.	El-Agnaf OM1, Salem SA, Paleologou KE, Cooper LJ, Fullwood NJ, Gibson MJ, Curran MD, Court JA, Mann DM, Ikeda S, Cookson MR, Hardy J, Allsop D.	FASEB J.	2003 Oct	17(13):1945-7	Neuroblastoma, not SH-SY5Y
14525944	The importance of propargylamine moiety in the anti-Parkinson drug rasagiline and its derivatives in MAPK-dependent amyloid precursor protein processing	Yogev-Falach M, Amit T, Bar-Am O, Youdim MB.	FASEB J.	2003 Dec	17(15):2325-7.	Not PD specific
14535945	Fe(II)-induced DNA damage in alpha-synuclein-transfected human dopaminergic BE(2)-M17 neuroblastoma cells: detection by the Comet assay.	Martin FL1, Williamson SJ, Paleologou KE, Hewitt R, El-Agnaf OM, Allsop D.	J Neurochem.	2003 Nov	87(3):620-30	Neuroblastoma, not SH-SY5Y
14555244	The essentiality of Bcl-2, PKC and proteasome-ubiquitin complex activations in the neuroprotective-antiapoptotic action of the anti-Parkinson drug, rasagiline	Youdim MB, Amit T, Falach-Yogev M, Bar Am O, Maruyama W, Naoi M.	Biochem Pharmacol.	2003 Oct 15	66(8):1635-41.	Review
14559152	SEPT5_v2 is a parkin-binding protein.	Choi P1, Snyder H, Petrucelli L, Theisler C, Chong M, Zhang Y, Lim K, Chung KK, Kehoe K, D'Adamio L, Lee JM, Cochran E, Bowser R, Dawson TM, Wolozin B.	Brain Res Mol Brain Res.	2003 Oct 7	117(2):179-89	Use of the cell line to perform an immunoprecipitation of a protein
14568136	Neuroprotective effect of citicoline in 6-hydroxydopamine-lesioned rats and in 6-hydroxydopamine-treated SH-SY5Y human neuroblastoma cells	Barrachina M, DomÃ­nguez I, Ambrosio S, Secades J, Lozano R, Ferrer I.	J Neurol Sci.	2003 Nov 15	215(1-2):105-10.	x
14598303	An inhibitor of mitochondrial complex I, rotenone, inactivates proteasome by oxidative modification and induces aggregation of oxidized proteins in SH-SY5Y cells	Shamoto-Nagai M, Maruyama W, Kato Y, Isobe K, Tanaka M, Naoi M, Osawa T.	J Neurosci Res.	2003 Nov 15	74(4):589-97.	x
14599342	Apomorphine attenuates 6-hydroxydopamine-induced apoptotic cell death in SH-SY5Y cells	Hara H, Ohta M, Ohta K, Kuno S, Adachi T.	Redox Rep.	2003	8(4):193-7.	x
14611843	Neuroprotective or neurotoxic activity of 1-methyl-1,2,3,4-tetrahydroisoquinoline and related compounds	Okuda K, Kotake Y, Ohta S.	Bioorg Med Chem Lett.	2003 Sep 1	13(17):2853-5.	x
14625079	Increase of antioxidative potential by tert-butylhydroquinone protects against cell death associated with 6-hydroxydopamine-induced oxidative stress in neuroblastoma SH-SY5Y cells	Hara H, Ohta M, Ohta K, Kuno S, Adachi T.	Brain Res Mol Brain Res.	2003 Nov 26	119(2):125-31.	x
14637109	Neuroprotective effects of the novel D3/D2 receptor agonist and antiparkinson agent, S32504, in vitro against 1-methyl-4-phenylpyridinium (MPP+) and in vivo against 1-methyl-4-phenyl-1,2,3,6-tetrahydropyridine (MPTP): a comparison to ropinirole	Joyce JN, Presgraves S, Renish L, Borwege S, Osredkar T, Hagner D, Replogle M, PazSoldan M, Millan MJ.	Exp Neurol.	2003 Nov	184(1):393-407.	x
14645198	Parkin is recruited into aggresomes in a stress-specific manner: over-expression of parkin reduces aggresome formation but can be dissociated from parkin's effect on neuronal survival	Muqit MM, Davidson SM, Payne Smith MD, MacCormac LP, Kahns S, Jensen PH, Wood NW, Latchman DS.	Hum Mol Genet.	2004 Jan 1	13(1):117-35.	x
14645467	Mechanism of toxicity in rotenone models of Parkinson's disease.	Sherer TB1, Betarbet R, Testa CM, Seo BB, Richardson JR, Kim JH, Miller GW, Yagi T, Matsuno-Yagi A, Greenamyre JT.	J Neurosci.	2003 Nov 26	23(34):10756-64	Neuroblastoma, not SH-SY5Y
14651989	Cloning and cell type-specific regulation of the human tyrosine hydroxylase gene promoter	Kim TE, Park MJ, Choi EJ, Lee HS, Lee SH, Yoon SH, Oh CK, Lee BJ, Kim SU, Lee YS, Lee MA.	Biochem Biophys Res Commun.	2003 Dec 26	312(4):1123-31.	Not PD specific
14663004	Receptor heteromerization in adenosine A2A receptor signaling: relevance for striatal function and Parkinson's disease.	Fuxe K1, Agnati LF, Jacobsen K, Hillion J, Canals M, Torvinen M, Tinner-Staines B, Staines W, Rosin D, Terasmaa A, Popoli P, Leo G, Vergoni V, Lluis C, Ciruela F, Franco R, Ferré S.	Neurology.	2003 Dec 9	61(11 Suppl 6):S19-23	Review
14687604	N-Propargyl-1 (R)-aminoindan, rasagiline, increases glial cell line-derived neurotrophic factor (GDNF) in neuroblastoma SH-SY5Y cells through activation of NF-kappaB transcription factor	Maruyama W, Nitta A, Shamoto-Nagai M, Hirata Y, Akao Y, Yodim M, Furukawa S, Nabeshima T, Naoi M.	Neurochem Int.	2004 May	44(6):393-400.	x
14698476	alpha-Synuclein selectively increases manganese-induced viability loss in SK-N-MC neuroblastoma cells expressing the human dopamine transporter.	Pifl C1, Khorchide M, Kattinger A, Reither H, Hardy J, Hornykiewicz O.	Neurosci Lett.	2004 Jan 2	354(1):34-7	Neuroblastoma, not SH-SY5Y
14700734	p53-mediated mitochondrial dysfunction by proteasome inhibition in dopaminergic SH-SY5Y cells	Nakaso K, Yoshimoto Y, Yano H, Takeshima T, Nakashima K.	Neurosci Lett.	2004 Jan 16	354(3):213-6.	x
14739562	Salsolinol causing parkinsonism activates endoplasmic reticulum-stress signaling pathways in human dopaminergic SK-N-SH cells.	Kheradpezhouh M1, Shavali S, Ebadi M.	Neurosignals.	2003 Nov-Dec	12(6):315-24	Neuroblastoma, not SH-SY5Y
14742431	Proteasome inhibition alters neural mitochondrial homeostasis and mitochondria turnover	Sullivan PG, Dragicevic NB, Deng JH, Bai Y, Dimayuga E, Ding Q, Chen Q, Bruce-Keller AJ, Keller JN.	J Biol Chem.	2004 May 14	279(20):20699-707.	Not PD specific
14742448	Alpha-synuclein up-regulation and aggregation during MPP+-induced apoptosis in neuroblastoma cells: intermediacy of transferrin receptor iron and hydrogen peroxide.	Kalivendi SV1, Cunningham S, Kotamraju S, Joseph J, Hillard CJ, Kalyanaraman B.	J Biol Chem.	2004 Apr 9	279(15):15240-7	x
14749723	DJ-1 has a role in antioxidative stress to prevent cell death	Taira T, Saito Y, Niki T, Iguchi-Ariga SM, Takahashi K, Ariga H.	EMBO Rep.	2004 Feb	5(2):213-8.	x
14750218	Slowing Parkinson's disease progression: recent dopamine agonist trials	Pan T, Le W, Jankovic J.	Neurology.	2004 Jan 27	62(2):343	Comment
14756800	Clearance of alpha-synuclein oligomeric intermediates via the lysosomal degradation pathway.	Lee HJ1, Khoshaghideh F, Patel S, Lee SJ.	J Neurosci.	2004 Feb 25	24(8):1888-96	x
14975447	Analysis of gene expression in neural cells subject to chronic proteasome inhibition	Ding Q, Bruce-Keller AJ, Chen Q, Keller JN.	Free Radic Biol Med.	2004 Feb 15	36(4):445-55.	Not PD specific
14975680	Differences in toxicity of the catechol-O-methyl transferase inhibitors, tolcapone and entacapone to cultured human neuroblastoma cells	Korlipara LV, Cooper JM, Schapira AH.	Neuropharmacology.	2004 Mar	46(4):562-9.	Not PD specific
14976342	Rotenone-induced apoptosis is mediated by p38 and JNK MAP kinases in human dopaminergic SH-SY5Y cells	Newhouse K, Hsuan SL, Chang SH, Cai B, Wang Y, Xia Z.	Toxicol Sci.	2004 May	79(1):137-46.	x
14985416	Neuroprotective effects of a novel poly(ADP-ribose) polymerase-1 inhibitor, 2-[3-[4-(4-chlorophenyl)-1-piperazinyl] propyl]-4(3H)-quinazolinone (FR255595), in an in vitro model of cell death and in mouse 1-methyl-4-phenyl-1,2,3,6-tetrahydropyridine model of Parkinson's disease	Iwashita A, Yamazaki S, Mihara K, Hattori K, Yamamoto H, Ishida J, Matsuoka N, Mutoh S.	J Pharmacol Exp Ther.	2004 Jun	309(3):1067-78.	x
14985429	Parkinson's disease transgenic mitochondrial cybrids generate Lewy inclusion bodies.	Trimmer PA1, Borland MK, Keeney PM, Bennett JP Jr, Parker WD Jr.	J Neurochem.	2004 Feb	88(4):800-12	Use of the cell line to create cybrids
15019567	Inhibition of mixed lineage kinase 3 attenuates MPP+-induced neurotoxicity in SH-SY5Y cells	Mathiasen JR, McKenna BA, Saporito MS, Ghadge GD, Roos RP, Holskin BP, Wu ZL, Trusko SP, Connors TC, Maroney AC, Thomas BA, Thomas JC, Bozyczko-Coyne D.	Brain Res.	2004 Apr 2	1003(1-2):86-97.	x
15026413	Beta-synuclein regulates Akt activity in neuronal cells. A possible mechanism for neuroprotection in Parkinson's disease.	Hashimoto M1, Bar-On P, Ho G, Takenouchi T, Rockenstein E, Crews L, Masliah E.	J Biol Chem.	2004 May 28	279(22):23622-9	Neuroblastoma, not SH-SY5Y
15030396	Bcl-x L blocks mitochondrial multiple conductance channel activation and inhibits 6-OHDA-induced death in SH-SY5Y cells	JordÃ¡n J, Galindo MF, Tornero D, GonzÃ¡lez-GarcÃ­a C, CeÃ±a V.	J Neurochem.	2004 Apr	89(1):124-33.	x
15033417	The role of oxidative stress, impaired glycolysis and mitochondrial respiratory redox failure in the cytotoxic effects of 6-hydroxydopamine in vitro.	Mazzio EA1, Reams RR, Soliman KF.	Brain Res.	2004 Apr 9	1004(1-2):29-44	Neuroblastoma, not SH-SY5Y
15033422	Histochemical features of stress-induced aggregates in alpha-synuclein overexpressing cells	Matsuzaki M, Hasegawa T, Takeda A, Kikuchi A, Furukawa K, Kato Y, Itoyama Y.	Brain Res.	2004 Apr 9	1004(1-2):83-90.	x
15033739	1-trichloromethyl-1,2,3,4-tetrahydro-beta-carboline (TaClo) induces apoptosis in human neuroblastoma cell lines.	Akundi RS1, Hüll M, Clement HW, Fiebich BL.	Ann N Y Acad Sci.	2003 Dec	1010:304-6	x
15035641	Phthalocyanine tetrasulfonates affect the amyloid formation and cytotoxicity of alpha-synuclein	Lee EN, Cho HJ, Lee CH, Lee D, Chung KC, Paik SR.	Biochemistry.	2004 Mar 30	43(12):3704-15.	x
15035819	Anti-apoptotic function of propargylamine inhibitors of type-B monoamine oxidase	Naoi M, Maruyama W, Youdim MB, Yu P, Boulton AA.	Inflammopharmacology.	2003	11(2):175-81.	x
15044066	Salsolinol, a dopamine-derived tetrahydroisoquinoline, induces cell death by causing oxidative stress in dopaminergic SH-SY5Y cells, and the said effect is attenuated by metallothionein	Wanpen S, Govitrapong P, Shavali S, Sangchot P, Ebadi M.	Brain Res.	2004 Apr 16	1005(1-2):67-76.	x
15044090	Induction of endogenous glutathione by the chemoprotective agent, 3H-1,2-dithiole-3-thione, in human neuroblastoma SH-SY5Y cells affords protection against peroxynitrite-induced cytotoxicity	Cao Z, Hallur S, Qiu HZ, Peng X, Li Y.	Biochem Biophys Res Commun.	2004 Apr 16	316(4):1043-9.	Not PD specific
15078880	N-myc regulates parkin expression.	West AB1, Kapatos G, O'Farrell C, Gonzalez-de-Chavez F, Chiu K, Farrer MJ, Maidment NT.	J Biol Chem.	2004 Jul 9	279(28):28896-902	x
15079871	Overexpression of alpha-synuclein decreased viability and enhanced sensitivity to prostaglandin E(2), hydrogen peroxide, and a nitric oxide donor in differentiated neuroblastoma cells.	Prasad JE1, Kumar B, Andreatta C, Nahreini P, Hanson AJ, Yan XD, Prasad KN.	J Neurosci Res.	2004 May 1	76(3):415-22	Not PD specific
15087238	Cabergoline protects SH-SY5Y neuronal cells in an in vitro model of ischemia	Miglio G, Varsaldi F, Francioli E, Battaglia A, Canonico PL, Lombardi G.	Eur J Pharmacol.	2004 Apr 12	489(3):157-65.	Not PD specific
15102525	Neuroprotective function of R-(-)-1-(benzofuran-2-yl)-2-propylaminopentane, [R-(-)-BPAP], against apoptosis induced by N-methyl(R)salsolinol, an endogenous dopaminergic neurotoxin, in human dopaminergic neuroblastoma SH-SY5Y cells	Maruyama W, Yi H, Takahashi T, Shimazu S, Ohde H, Yoneda F, Iwasa K, Naoi M.	Life Sci.	2004 May 21	75(1):107-17.	x
15114628	1-Benzyl-1,2,3,4-tetrahydroisoquinoline, a Parkinsonism-inducing endogenous toxin, increases alpha-synuclein expression and causes nuclear damage in human dopaminergic cells	Shavali S, Carlson EC, Swinscoe JC, Ebadi M.	J Neurosci Res.	2004 May 15	76(4):563-71.	x
15120578	Neuroprotective effect of fraxetin and myricetin against rotenone-induced apoptosis in neuroblastoma cells	Molina-JimÃ©nez MF, SÃ¡nchez-Reus MI, Andres D, Cascales M, Benedi J.	Brain Res.	2004 May 29	1009(1-2):9-16.	x
15122920	Differential cytotoxicity of human wild type and mutant alpha-synuclein in human neuroblastoma SH-SY5Y cells in the presence of dopamine	Moussa CE, Wersinger C, Tomita Y, Sidhu A.	Biochemistry.	2004 May 11	43(18):5539-50.	x
15130772	Dopamine toxicity involves mitochondrial complex I inhibition: implications to dopamine-related neuropsychiatric disorders	Ben-Shachar D, Zuk R, Gazawi H, Ljubuncic P.	Biochem Pharmacol.	2004 May 15	67(10):1965-74.	x
15132987	Glycogen synthase kinase 3beta (GSK3beta) mediates 6-hydroxydopamine-induced neuronal death	Chen G, Bower KA, Ma C, Fang S, Thiele CJ, Luo J.	FASEB J.	2004 Jul	18(10):1162-4.	x
15147504	Regulation of protein kinase C by the anti-Parkinson drug, MAO-B inhibitor, rasagiline and its derivatives, in vivo	Bar-Am O, Yogev-Falach M, Amit T, Sagi Y, Youdim MB.	J Neurochem.	2004 Jun	89(5):1119-25.	SH-SY5Y used in previous studies
15180968	A strategy for designing inhibitors of alpha-synuclein aggregation and toxicity as a novel treatment for Parkinson's disease and related disorders.	El-Agnaf OM1, Paleologou KE, Greer B, Abogrein AM, King JE, Salem SA, Fullwood NJ, Benson FE, Hewitt R, Ford KJ, Martin FL, Harriott P, Cookson MR, Allsop D.	FASEB J.	2004 Aug	18(11):1315-7	Neuroblastoma, not SH-SY5Y
15183009	Manganese-induced cytotoxicity in dopamine-producing cells.	Stredrick DL1, Stokes AH, Worst TJ, Freeman WM, Johnson EA, Lash LH, Aschner M, Vrana KE.	Neurotoxicology.	2004 Jun	25(4):543-53	Not PD specific
15189352	Parkin attenuates manganese-induced dopaminergic cell death	Higashi Y, Asanuma M, Miyazaki I, Hattori N, Mizuno Y, Ogawa N.	J Neurochem.	2004 Jun	89(6):1490-7.	x
15196967	Accelerated alpha-synuclein aggregation after differentiation of SH-SY5Y neuroblastoma cells	Hasegawa T, Matsuzaki M, Takeda A, Kikuchi A, Akita H, Perry G, Smith MA, Itoyama Y.	Brain Res.	2004 Jul 2	1013(1):51-9.	x
15198987	Parkin protects human dopaminergic neuroblastoma cells against dopamine-induced apoptosis	Jiang H, Ren Y, Zhao J, Feng J.	Hum Mol Genet.	2004 Aug 15	13(16):1745-54.	x
15264013	Selegiline increases heme oxygenase-1 expression and the cytotoxicity produced by dopamine treatment of neuroblastoma SK-N-SH cells.	Rieder CR1, Williams AC, Ramsden DB.	Braz J Med Biol Res.	2004 Jul	37(7):1055-62	Neuroblastoma, not SH-SY5Y
15280438	Rotenone induces apoptosis via activation of bad in human dopaminergic SH-SY5Y cells	Watabe M, Nakaki T.	J Pharmacol Exp Ther.	2004 Dec	311(3):948-53.	x
15331164	Co-treatment with ethanol enhances the toxicity of 6-hydroxydopamine.	Ming Z1, Zhi-shun L, Jin-fa G, Lan-yin S, Xin-yuan L.	Neurosci Lett.	2004 Sep 2	367(2):250-3	Neuroblastoma, not SH-SY5Y
15336311	Progressive iron accumulation induces a biphasic change in the glutathione content of neuroblastoma cells	NÃºÃ±ez MT, Gallardo V, MuÃ±oz P, Tapia V, Esparza A, Salazar J, Speisky H.	Free Radic Biol Med.	2004 Oct 1	37(7):953-60.	x
15353226	Identification of the protein disulfide isomerase family member PDIp in experimental Parkinson's disease and Lewy body pathology	Conn KJ, Gao W, McKee A, Lan MS, Ullman MD, Eisenhauer PB, Fine RE, Wells JM.	Brain Res.	2004 Oct 1	1022(1-2):164-72.	x
15384204	The cytotoxic activity of lactoperoxidase: enhancement and inhibition by neuroactive compounds.	Everse J1, Coates PW.	Free Radic Biol Med.	2004 Sep 15	37(6):839-49	Neuroblastoma used on other studies
15447660	1-trichloromethyl-1,2,3,4-tetrahydro-beta-carboline-induced apoptosis in the human neuroblastoma cell line SK-N-SH.	Akundi RS1, Macho A, Muñoz E, Lieb K, Bringmann G, Clement HW, Hüll M, Fiebich BL.	J Neurochem.	2004 Oct	91(2):263-73	Neuroblastoma, not SH-SY5Y
15473989	Involvement of dopamine D(2)/D(3) receptors and BDNF in the neuroprotective effects of S32504 and pramipexole against 1-methyl-4-phenylpyridinium in terminally differentiated SH-SY5Y cells	Presgraves SP, Borwege S, Millan MJ, Joyce JN.	Exp Neurol.	2004 Nov	190(1):157-70.	x
15475185	The roles of dopamine transporter and Bcl-2 protein in the protection of CV1-P cells from 6-OHDA-induced toxicity	ManÃ¡kovÃ¡ S, Puttonen KA, Raasmaja A, MÃ¤nnistÃ PT.	Toxicol Lett.	2004 Dec 1	154(1-2):117-23.	SH-SY5Y used in previous studies
15478178	(-)-Epigallocatechin gallate inhibits lipopolysaccharide-induced microglial activation and protects against inflammation-mediated dopaminergic neuronal injury	Li R, Huang YG, Fang D, Le WD.	J Neurosci Res.	2004 Dec 1	78(5):723-31.	x
15480837	Neuromelanin inhibits enzymatic activity of 26S proteasome in human dopaminergic SH-SY5Y cells	Shamoto-Nagai M, Maruyama W, Akao Y, Osawa T, Tribl F, Gerlach M, Zucca FA, Zecca L, Riederer P, Naoi M.	J Neural Transm (Vienna).	2004 Oct	111(10-11):1253-65.	x
15480843	Antiapoptotic effects of budipine.	Müller T1, Przuntek H, Krüger R, Mackowiak A.	J Neural Transm (Vienna).	2004 Oct	111(10-11):1365-73	x
15492001	Parkin increases dopamine uptake by enhancing the cell surface expression of dopamine transporter	Jiang H, Jiang Q, Feng J.	J Biol Chem.	2004 Dec 24	279(52):54380-6.	x
15519605	Paraquat induces oxidative stress and neuronal cell death; neuroprotection by water-soluble Coenzyme Q10.	McCarthy S1, Somayajulu M, Sikorska M, Borowy-Borowski H, Pandey S.	Toxicol Appl Pharmacol.	2004 Nov 15	201(1):21-31	x
15519765	Abnormal migration of human wild-type alpha-synuclein upon gel electrophoresis	Moussa CE, Wersinger C, Rusnak M, Tomita Y, Sidhu A.	Neurosci Lett.	2004 Nov 23	371(2-3):239-43.	x
15527873	Inhibitory effects of cigarette smoke on glial inducible nitric oxide synthase and lack of protective properties against oxidative neurotoxins in vitro.	Mazzio EA1, Kolta MG, Reams RR, Soliman KF.	Neurotoxicology.	2005 Jan	26(1):49-62	Neuroblastoma, not SH-SY5Y
15542611	TRPC1-mediated inhibition of 1-methyl-4-phenylpyridinium ion neurotoxicity in human SH-SY5Y neuroblastoma cells	Bollimuntha S, Singh BB, Shavali S, Sharma SK, Ebadi M.	J Biol Chem.	2005 Jan 21	280(3):2132-40.	x
15557340	Parkin phosphorylation and modulation of its E3 ubiquitin ligase activity	Yamamoto A, Friedlein A, Imai Y, Takahashi R, Kahle PJ, Haass C.	J Biol Chem.	2005 Feb 4	280(5):3390-9.	x
15567525	TPPP/p25: from unfolded protein to misfolding disease: prediction and experiments.	Orosz F1, Kovács GG, Lehotzky A, Oláh J, Vincze O, Ovádi J.	Biol Cell.	2004 Dec	96(9):701-11	Not PD specific
15567979	Indolalkylamines derivatives as antioxidant and neuroprotective agents in an experimental model of Parkinson's disease.	Sanz E1, Romera M, Bellik L, Marco JI, Unzeta M.	Med Sci Monit.	2004 Dec	10(12):BR477-84	x
15569251	Pramipexole protects against apoptotic cell death by non-dopaminergic mechanisms.	Gu M1, Iravani MM, Cooper JM, King D, Jenner P, Schapira AH.	J Neurochem.	2004 Dec	91(5):1075-81	x
15620682	Proteasome inhibition and Tau proteolysis: an unexpected regulation.	Delobel P1, Leroy O, Hamdane M, Sambo AV, Delacourte A, Buée L.	FEBS Lett.	2005 Jan 3	579(1):1-5	Not PD specific
15635600	Upregulation of clusterin/apolipoprotein J in lactacystin-treated SH-SY5Y cells	Carreras I, Garrett-Young R, Ullman MD, Eisenhauer PB, Fine RE, Wells JM, Conn KJ.	J Neurosci Res.	2005 Feb 15	79(4):495-502.	x
15639802	The carbonyl scavengers aminoguanidine and tenilsetam protect against the neurotoxic effects of methylglyoxal.	Webster J1, Urban C, Berbaum K, Loske C, Alpar A, Gärtner U, de Arriba SG, Arendt T, Münch G.	Neurotox Res.	2005	7(1-2):95-101	Not PD specific
15649705	RA410/Sly1 suppresses MPP+ and 6-hydroxydopamine-induced cell death in SH-SY5Y cells	Bando Y, Katayama T, Taniguchi M, Ishibashi T, Matsuo N, Ogawa S, Tohyama M.	Neurobiol Dis.	2005 Feb	18(1):143-51.	x
15672325	Regulation of alpha-synuclein expression by poly (ADP ribose) polymerase-1 (PARP-1) binding to the NACP-Rep1 polymorphic site upstream of the SNCA gene	Chiba-Falek O, Kowalak JA, Smulson ME, Nussbaum RL.	Am J Hum Genet.	2005 Mar	76(3):478-92.	x
15680548	Induction of C/EBP beta and GADD153 expression by dopamine in human neuroblastoma cells. Relationship with alpha-synuclein increase and cell damage	GÃ³mez-Santos C, Barrachina M, GimÃ©nez-Xavier P, DalfÃ³ E, Ferrer I, Ambrosio S.	Brain Res Bull.	2005 Feb 15	65(1):87-95.	x
15681030	Salvianic acid A protects human neuroblastoma SH-SY5Y cells against MPP+-induced cytotoxicity	Wang XJ, Xu JX.	Neurosci Res.	2005 Feb	51(2):129-38.	x
15698934	Possible involvement of Ca2+ signaling in rotenone-induced apoptosis in human neuroblastoma SH-SY5Y cells	Wang XJ, Xu JX.	Neurosci Lett.	2005 Mar 11	376(2):127-32.	x
15712215	p-Quinone mediates 6-hydroxydopamine-induced dopaminergic neuronal death and ferrous iron accelerates the conversion of p-quinone into melanin extracellularly	Izumi Y, Sawada H, Sakka N, Yamamoto N, Kume T, Katsuki H, Shimohama S, Akaike A.	J Neurosci Res.	2005 Mar 15	79(6):849-60.	x
15740846	Biological effects of pramipexole on dopaminergic neuron-associated genes: relevance to neuroprotection	Pan T, Xie W, Jankovic J, Le W.	Neurosci Lett.	2005 Mar 29	377(2):106-9.	x
15748876	Failure of FK506 (tacrolimus) to alleviate apomorphine-induced circling in rat Parkinson model in spite of some cytoprotective effects in SH-SY5Y dopaminergic cells	ManÃ¡kovÃ¡ S, Singh A, KÃ¤Ã¤riÃ¤inen T, Taari H, Kulkarni SK, MÃ¤nnistÃ PT.	Brain Res.	2005 Mar 15	1038(1):83-91.	x
15773923	Tyrosinase exacerbates dopamine toxicity but is not genetically associated with Parkinson's disease.	Greggio E1, Bergantino E, Carter D, Ahmad R, Costin GE, Hearing VJ, Clarimon J, Singleton A, Eerola J, Hellström O, Tienari PJ, Miller DW, Beilina A, Bubacco L, Cookson MR.	J Neurochem.	2005 Apr	93(1):246-56	Neuroblastoma, not SH-SY5Y
15779083	Chymotrypsin-like proteases contribute to human monocytic THP-1 cell as well as human microglial neurotoxicity	Klegeris A, McGeer PL.	Glia.	2005 Jul	51(1):56-64.	Not PD specific
15781608	Autophagy-dependent cell survival and cell death in an autosomal dominant familial neurohypophyseal diabetes insipidus in vitro model.	Castino R1, Isidoro C, Murphy D.	FASEB J.	2005 Jun	19(8):1024-6	Not PD specific
15781609	Autophagy is a prosurvival mechanism in cells expressing an autosomal dominant familial neurohypophyseal diabetes insipidus mutant vasopressin transgene.	Castino R1, Davies J, Beaucourt S, Isidoro C, Murphy D.	FASEB J.	2005 Jun	19(8):1021-3	Not PD specific
15790532	Effects of DJ-1 mutations and polymorphisms on protein stability and subcellular localization.	Blackinton J1, Ahmad R, Miller DW, van der Brug MP, Canet-Avilés RM, Hague SM, Kaleem M, Cookson MR.	Brain Res Mol Brain Res.	2005 Mar 24	134(1):76-83	Neuroblastoma, not SH-SY5Y
15840579	A precipitating role for truncated alpha-synuclein and the proteasome in alpha-synuclein aggregation: implications for pathogenesis of Parkinson disease	Liu CW, Giasson BI, Lewis KA, Lee VM, Demartino GN, Thomas PJ.	J Biol Chem.	2005 Jun 17	280(24):22670-8.	x
15843867	N-Propargylamine protects SH-SY5Y cells from apoptosis induced by an endogenous neurotoxin, N-methyl(R)salsolinol, through stabilization of mitochondrial membrane and induction of anti-apoptotic Bcl-2	Yi H, Maruyama W, Akao Y, Takahashi T, Iwasa K, Youdim MB, Naoi M.	J Neural Transm (Vienna).	2006 Jan	113(1):21-32.	x
15845394	Phosphorylated IkappaBalpha is a component of Lewy body of Parkinson's disease	Noda K, Kitami T, Gai WP, Chegini F, Jensen PH, Fujimura T, Murayama K, Tanaka K, Mizuno Y, Hattori N.	Biochem Biophys Res Commun.	2005 May 27	331(1):309-17.	x
15850136	The effect of conventional and sustained delivery of levodopa on SH-SY5Y neuroblastoma cells	Martin TM, Benghuzzi H, Tucci M.	Biomed Sci Instrum.	2005	41:382-7.	Not accessible
15863497	Proteolytic cleavage of extracellular secreted {alpha}-synuclein via matrix metalloproteinases.	Sung JY1, Park SM, Lee CH, Um JW, Lee HJ, Kim J, Oh YJ, Lee ST, Paik SR, Chung KC.	J Biol Chem.	2005 Jul 1	280(26):25216-24	Neuroblastoma, not SH-SY5Y
15876476	Isatin, an endogenous monoamine oxidase inhibitor, triggers a dose- and time-dependent switch from apoptosis to necrosis in human neuroblastoma cells	Igosheva N, Lorz C, O'Conner E, Glover V, Mehmet H.	Neurochem Int.	2005 Aug	47(3):216-24.	x
15896322	Common anti-apoptotic roles of parkin and alpha-synuclein in human dopaminergic cells	Machida Y, Chiba T, Takayanagi A, Tanaka Y, Asanuma M, Ogawa N, Koyama A, Iwatsubo T, Ito S, Jansen PH, Shimizu N, Tanaka K, Mizuno Y, Hattori N.	Biochem Biophys Res Commun.	2005 Jun 24	332(1):233-40.	x
15944198	Mitochondrial localization of the Parkinson's disease related protein DJ-1: implications for pathogenesis.	Zhang L1, Shimoji M, Thomas B, Moore DJ, Yu SW, Marupudi NI, Torp R, Torgner IA, Ottersen OP, Dawson TM, Dawson VL.	Hum Mol Genet.	2005 Jul 15	14(14):2063-73	Not accessible
15944382	Alpha-synuclein phosphorylation enhances eosinophilic cytoplasmic inclusion formation in SH-SY5Y cells	Smith WW, Margolis RL, Li X, Troncoso JC, Lee MK, Dawson VL, Dawson TM, Iwatsubo T, Ross CA.	J Neurosci.	2005 Jun 8	25(23):5544-52.	x
15953813	Oxidative stress in mitochondria: decision to survival and death of neurons in neurodegenerative disorders	Naoi M, Maruyama W, Shamoto-Nagai M, Yi H, Akao Y, Tanaka M.	Mol Neurobiol.	2005	31(1-3):81-93.	Review
15964487	Involvement of mitochondrial potential and calcium buffering capacity in minocycline cytoprotective actions	Fernandez-Gomez FJ, Galindo MF, Gomez-Lazaro M, GonzÃ¡lez-GarcÃ­a C, CeÃ±a V, Aguirre N, JordÃ¡n J.	Neuroscience.	2005	133(4):959-67.	Not PD specific
15985439	Investigating the receptor-independent neuroprotective mechanisms of nicotine in mitochondria	Xie YX, Bezard E, Zhao BL.	J Biol Chem.	2005 Sep 16	280(37):32405-12.	x
16000145	ATP-sensitive potassium channel opener iptakalim protected against the cytotoxicity of MPP+ on SH-SY5Y cells by decreasing extracellular glutamate level	Hu LF, Wang S, Shi XR, Yao HH, Sun YH, Ding JH, Liu SY, Hu G.	J Neurochem.	2005 Sep	94(6):1570-9.	x
16023352	Lentivirus-mediated expression of glutathione peroxidase: neuroprotection in murine models of Parkinson's disease.	Ridet JL1, Bensadoun JC, Déglon N, Aebischer P, Zurn AD.	Neurobiol Dis.	2006 Jan	21(1):29-34	x
16079129	Wild-type PINK1 prevents basal and induced neuronal apoptosis, a protective effect abrogated by Parkinson disease-related mutations	Petit A, Kawarai T, Paitel E, Sanjo N, Maj M, Scheid M, Chen F, Gu Y, Hasegawa H, Salehi-Rad S, Wang L, Rogaeva E, Fraser P, Robinson B, St George-Hyslop P, Tandon A.	J Biol Chem.	2005 Oct 7	280(40):34025-32.	x
16085186	Protective effect of green tea polyphenols on the SH-SY5Y cells against 6-OHDA induced apoptosis through ROS-NO pathway	Guo S, Bezard E, Zhao B.	Free Radic Biol Med.	2005 Sep 1	39(5):682-95.	x
16092930	Increased nuclear factor-erythroid 2 p45-related factor 2 activity protects SH-SY5Y cells against oxidative damage	Cao TT, Ma L, Kandpal G, Warren L, Hess JF, Seabrook GR.	J Neurochem.	2005 Oct	95(2):406-17.	x
16093527	Induction of reactive oxygen species by bisphenol A and abrogation of bisphenol A-induced cell injury by DJ-1.	Ooe H1, Taira T, Iguchi-Ariga SM, Ariga H.	Toxicol Sci.	2005 Nov	88(1):114-26	Neuroblastoma, not SH-SY5Y
16108071	Iron accelerates the conversion of dopamine-oxidized intermediates into melanin and provides protection in SH-SY5Y cells	Izumi Y, Sawada H, Yamamoto N, Kume T, Katsuki H, Shimohama S, Akaike A.	J Neurosci Res.	2005 Oct 1	82(1):126-37.	x
16141438	Paraquat neurotoxicity is distinct from that of MPTP and rotenone.	Richardson JR1, Quan Y, Sherer TB, Greenamyre JT, Miller GW.	Toxicol Sci.	2005 Nov	88(1):193-201	Neuroblastoma, not SH-SY5Y
16148027	Regulation of Bcl-2 family proteins, neurotrophic factors, and APP processing in the neurorescue activity of propargylamine	Bar-Am O, Weinreb O, Amit T, Youdim MB.	FASEB J.	2005 Nov	19(13):1899-901.	Not PD specific
16149534	3,4-Dihydroxyphenyl alanine (DOPA)	Yatabe J1, Sanada H.	Nihon Rinsho.	2005 Aug	63 Suppl 8:380-3	Japanese
16149535	3,4-Dihydroxyphenylacetic acid (DOPAC)	Sasaki M1, Sanada H.	Nihon Rinsho.	2005 Aug	63 Suppl 8:384-7	Japanese
16149536	Dopamine	Ozono R1.	Nihon Rinsho.	2005 Aug	63 Suppl 8:388-90	Japanese
16155345	DNA damage induces cdk2 protein levels and histone H2B phosphorylation in SH-SY5Y neuroblastoma cells	Yu X, Caltagarone J, Smith MA, Bowser R.	J Alzheimers Dis.	2005 Sep	8(1):7-21.	x
16180106	Neurotoxic dopamine quinone facilitates the assembly of tau into fibrillar polymers.	Santa-María I1, Hernández F, Smith MA, Perry G, Avila J, Moreno FJ.	Mol Cell Biochem.	2005 Oct	278(1-2):203-12	Not PD specific
16198233	Sepiapterin attenuates 1-methyl-4-phenylpyridinium-induced apoptosis in neuroblastoma cells transfected with neuronal NOS: role of tetrahydrobiopterin, nitric oxide, and proteasome activation	Shang T, Kotamraju S, Zhao H, Kalivendi SV, Hillard CJ, Kalyanaraman B.	Free Radic Biol Med.	2005 Oct 15	39(8):1059-74.	x
16235253	Heat shock proteins reduce toxicity of 1-methyl-4-phenylpyridinium ion in SK-N-SH cells.	Fan GH1, Qi C, Chen SD.	J Neurosci Res.	2005 Nov 15	82(4):551-62	Neuroblastoma, not SH-SY5Y
16237680	Estrogen attenuates gp120- and tat1-72-induced oxidative stress and prevents loss of dopamine transporter function.	Wallace DR1, Dodson S, Nath A, Booze RM.	Synapse.	2006 Jan	59(1):51-60	Not PD specific
16263688	The bipyridyl herbicide paraquat produces oxidative stress-mediated toxicity in human neuroblastoma SH-SY5Y cells: relevance to the dopaminergic pathogenesis	Yang W, Tiffany-Castiglioni E.	J Toxicol Environ Health A.	2005 Nov 26	68(22):1939-61.	Not accessible
16313906	Valproic acid-mediated Hsp70 induction and anti-apoptotic neuroprotection in SH-SY5Y cells	Pan T, Li X, Xie W, Jankovic J, Le W.	FEBS Lett.	2005 Dec 19	579(30):6716-20.	x
16316656	Lack of direct role of parkin in the steady-state level and aggregation of alpha-synuclein and the clearance of pre-formed aggregates.	Kim YS1, Patel S, Lee SJ.	Exp Neurol.	2006 Feb	197(2):538-41	x
16323286	Baicalein attenuates 6-hydroxydopamine-induced neurotoxicity in SH-SY5Y cells	Lee HJ, Noh YH, Lee DY, Kim YS, Kim KY, Chung YH, Lee WB, Kim SS.	Eur J Cell Biol.	2005 Nov	84(11):897-905.	x
16325180	The alpha-synuclein mutation E46K promotes aggregation in cultured cells	Pandey N, Schmidt RE, Galvin JE.	Exp Neurol.	2006 Feb	197(2):515-20.	x
16325767	Novel cytoprotective mechanism of anti-parkinsonian drug deprenyl: PI3K and Nrf2-derived induction of antioxidative proteins	Nakaso K, Nakamura C, Sato H, Imamura K, Takeshima T, Nakashima K.	Biochem Biophys Res Commun.	2006 Jan 20	339(3):915-22.	x
16330551	Dequalinium-induced protofibril formation of alpha-synuclein.	Lee CH1, Kim HJ, Lee JH, Cho HJ, Kim J, Chung KC, Jung S, Paik SR.	J Biol Chem.	2006 Feb 10	281(6):3463-72	x
16336631	Type A monoamine oxidase is the target of an endogenous dopaminergic neurotoxin, N-methyl(R)salsolinol, leading to apoptosis in SH-SY5Y cells	Yi H, Akao Y, Maruyama W, Chen K, Shih J, Naoi M.	J Neurochem.	2006 Jan	96(2):541-9.	x
16352719	Leucine-rich repeat kinase 2 (LRRK2) interacts with parkin, and mutant LRRK2 induces neuronal degeneration	Smith WW, Pei Z, Jiang H, Moore DJ, Liang Y, West AB, Dawson VL, Dawson TM, Ross CA.	Proc Natl Acad Sci U S A.	2005 Dec 20	102(51):18676-81.	x
16353238	1-methyl-4-phenylpyridinium neurotoxicity is attenuated by adenoviral gene transfer of human Cu/Zn superoxide dismutase.	Barkats M1, Horellou P, Colin P, Millecamps S, Faucon-Biguet N, Mallet J.	J Neurosci Res.	2006 Feb 1	83(2):233-42	Neuroblastoma, not SH-SY5Y
16360119	Rosiglitazone protects human neuroblastoma SH-SY5Y cells against acetaldehyde-induced cytotoxicity	Jung TW, Lee JY, Shim WS, Kang ES, Kim SK, Ahn CW, Lee HC, Cha BS.	Biochem Biophys Res Commun.	2006 Feb 3	340(1):221-7.	x
16362626	Neuromelanin induces oxidative stress in mitochondria through release of iron: mechanism behind the inhibition of 26S proteasome	Shamoto-Nagai M, Maruyama W, Yi H, Akao Y, Tribl F, Gerlach M, Osawa T, Riederer P, Naoi M.	J Neural Transm (Vienna).	2006 May	113(5):633-44.	x
16371323	Neuroprotective effects of nicotine against salsolinol-induced cytotoxicity: implications for Parkinson's disease	Copeland RL Jr, Leggett YA, Kanaan YM, Taylor RE, Tizabi Y.	Neurotox Res.	2005 Nov	8(3-4):289-93.	x
16373949	Selenomethionine prevents degeneration induced by overexpression of wild-type human alpha-synuclein during differentiation of neuroblastoma cells.	Kumar B1, Nahreini P, Hanson AJ, Andreatta C, Prasad JE, Prasad KN.	J Am Coll Nutr.	2005 Dec	24(6):516-23	Neuroblastoma, not SH-SY5Y
16410750	Upregulation of protease-activated receptor-1 in astrocytes in Parkinson disease: astrocyte-mediated neuroprotection through increased levels of glutathione peroxidase.	Ishida Y1, Nagai A, Kobayashi S, Kim SU.	J Neuropathol Exp Neurol.	2006 Jan	65(1):66-77	Use of the cell line to create cybrids
16447759	[Pathogenesis of Parkinson's disease: a common pathway between alpha-synuclein and parkin and the mechanism of Lewy bodies formation]	Hattori N, Machida Y, Noda K.	Rinsho Shinkeigaku.	2005 Nov	45(11):905-7.	Japanese
16455076	Silencing of human alpha-synuclein in vitro and in rat brain using lentiviral-mediated RNAi	Sapru MK, Yates JW, Hogan S, Jiang L, Halter J, Bohn MC.	Exp Neurol.	2006 Apr	198(2):382-90.	x
16455660	Parkin suppresses the expression of monoamine oxidases	Jiang H, Jiang Q, Liu W, Feng J.	J Biol Chem.	2006 Mar 31	281(13):8591-9.	x
16459123	Reversible Parkinsonian syndrome associated with anti-neuronal antibodies in acute EBV encephalitis: a case report.	Roselli F1, Russo I, Fraddosio A, Aniello MS, De Mari M, Lamberti P, Livrea P, Defazio G.	Parkinsonism Relat Disord.	2006 May	12(4):257-60	Not PD specific
16464850	6-Hydroxydopamine but not 1-methyl-4-phenylpyridinium abolishes alpha-synuclein anti-apoptotic phenotype by inhibiting its proteasomal degradation and by promoting its aggregation	Alves da Costa C, Dunys J, Brau F, Wilk S, Cappai R, Checler F.	J Biol Chem.	2006 Apr 7	281(14):9824-31.	x
16475001	Reactive macrophages increase oxidative stress and alpha-synuclein nitration during death of dopaminergic neuronal cells in co-culture: relevance to Parkinson's disease	Shavali S, Combs CK, Ebadi M.	Neurochem Res.	2006 Jan	31(1):85-94.	x
16495229	Caspase-3-derived C-terminal product of synphilin-1 displays antiapoptotic function via modulation of the p53-dependent cell death pathway	Giaime E, Sunyach C, Herrant M, Grosso S, Auberger P, McLean PJ, Checler F, da Costa CA.	J Biol Chem.	2006 Apr 28	281(17):11515-22.	x
16513298	Extremely low-frequency electromagnetic field (ELF-EMF) does not affect the expression of alpha3, alpha5 and alpha7 nicotinic receptor subunit genes in SH-SY5Y neuroblastoma cell line	Antonini RA, Benfante R, Gotti C, Moretti M, Kuster N, Schuderer J, Clementi F, Fornasari D.	Toxicol Lett.	2006 Jul 14	164(3):268-77.	Not PD specific
16515547	Critical role of ASK1 in the 6-hydroxydopamine-induced apoptosis in human neuroblastoma SH-SY5Y cells	Ouyang M, Shen X.	J Neurochem.	2006 Apr	97(1):234-44.	x
16539659	Reduction of iron-regulated amyloid precursor protein and beta-amyloid peptide by (-)-epigallocatechin-3-gallate in cell cultures: implications for iron chelation in Alzheimer's disease	Reznichenko L, Amit T, Zheng H, Avramovich-Tirosh Y, Youdim MB, Weinreb O, Mandel S.	J Neurochem.	2006 Apr	97(2):527-36.	Not PD specific
16549224	5-S-Cysteinyl-dopamine effect on the human dopaminergic neuroblastoma cell line SH-SY5Y	Mosca L, Lendaro E, d'Erme M, Marcellini S, Moretti S, Rosei MA.	Neurochem Int.	2006 Aug	49(3):262-9.	x
16554029	Adiponectin protects human neuroblastoma SH-SY5Y cells against MPP+-induced cytotoxicity	Jung TW, Lee JY, Shim WS, Kang ES, Kim JS, Ahn CW, Lee HC, Cha BS.	Biochem Biophys Res Commun.	2006 May 5	343(2):564-70.	x
16584840	Proteasomal inhibition hypersensitizes differentiated neuroblastoma cells to oxidative damage	Lev N, Melamed E, Offen D.	Neurosci Lett.	2006 May 15	399(1-2):27-32.	x
16621793	Functional repression of cAMP response element in 6-hydroxydopamine-treated neuronal cells	Chalovich EM, Zhu JH, Caltagarone J, Bowser R, Chu CT.	J Biol Chem.	2006 Jun 30	281(26):17870-81.	x
16626962	Inhibitory effects of pesticides on proteasome activity: implication in Parkinson's disease.	Wang XF1, Li S, Chou AP, Bronstein JM.	Neurobiol Dis.	2006 Jul	23(1):198-205	Neuroblastoma, not SH-SY5Y
16632486	Association of PINK1 and DJ-1 confers digenic inheritance of early-onset Parkinson's disease	Tang B, Xiong H, Sun P, Zhang Y, Wang D, Hu Z, Zhu Z, Ma H, Pan Q, Xia JH, Xia K, Zhang Z.	Hum Mol Genet.	2006 Jun 1	15(11):1816-25.	x
16641227	Basic fibroblast growth factor protects against rotenone-induced dopaminergic cell death through activation of extracellular signal-regulated kinases 1/2 and phosphatidylinositol-3 kinase pathways	Hsuan SL, Klintworth HM, Xia Z.	J Neurosci.	2006 Apr 26	26(17):4481-91.	x
16681381	Small molecule inhibitors of alpha-synuclein filament assembly	Masuda M, Suzuki N, Taniguchi S, Oikawa T, Nonaka T, Iwatsubo T, Hisanaga S, Goedert M, Hasegawa M.	Biochemistry.	2006 May 16	45(19):6085-94.	x
16707114	Nicotine modulates expression of amyloid precursor protein and amyloid precursor-like protein 2 in mouse brain and in SH-SY5Y neuroblastoma cells	Gutala R, Wang J, Hwang YY, Haq R, Li MD.	Brain Res.	2006 Jun 6	1093(1):12-9.	Not PD specific
16749908	Differential protection against MPTP or methamphetamine toxicity in dopamine neurons by deletion of ppN/OFQ expression	Brown JM, Gouty S, Iyer V, Rosenberger J, Cox BM.	J Neurochem.	2006 Jul	98(2):495-505.	x
16750479	Complex-1 activity and 18F-DOPA uptake in genetically engineered mouse model of Parkinson's disease and the neuroprotective role of coenzyme Q10.	Sharma SK1, El Refaey H, Ebadi M.	Brain Res Bull.	2006 Jun 15	70(1):22-32	Neuroblastoma, not SH-SY5Y
16762325	A novel therapeutic approach to 6-OHDA-induced Parkinson's disease in rats via supplementation of PTD-conjugated tyrosine hydroxylase	Wu SP, Fu AL, Wang YX, Yu LP, Jia PY, Li Q, Jin GZ, Sun MJ.	Biochem Biophys Res Commun.	2006 Jul 21	346(1):1-6.	x
16765919	TRPC1 protects human SH-SY5Y cells against salsolinol-induced cytotoxicity by inhibiting apoptosis	Bollimuntha S, Ebadi M, Singh BB.	Brain Res.	2006 Jul 12	1099(1):141-9.	x
16770736	Involvement of endoplasmic reticulum stress on the cell death induced by 6-hydroxydopamine in human neuroblastoma SH-SY5Y cells	Yamamuro A, Yoshioka Y, Ogita K, Maeda S.	Neurochem Res.	2006 May	31(5):657-64.	x
16781798	Methylglyoxal impairs glucose metabolism and leads to energy depletion in neuronal cells--protection by carbonyl scavengers	de Arriba SG, Stuchbury G, Yarin J, Burnell J, Loske C, MÃ¼nch G.	Neurobiol Aging.	2007 Jul	28(7):1044-50.	Not PD specific
16802348	Apomorphine protects against 6-hydroxydopamine-induced neuronal cell death through activation of the Nrf2-ARE pathway	Hara H, Ohta M, Adachi T.	J Neurosci Res.	2006 Sep	84(4):860-6.	x
16806074	Novel covalent modifications of alpha-synuclein during the recovery from proteasomal dysfunction.	Kim YS1, Lee SJ.	Biochem Biophys Res Commun.	2006 Aug 11	346(4):1312-9	x
16814256	Adiponectin protects human neuroblastoma SH-SY5Y cells against acetaldehyde-induced cytotoxicity	Jung TW, Lee JY, Shim WS, Kang ES, Kim JS, Ahn CW, Lee HC, Cha BS.	Biochem Pharmacol.	2006 Aug 28	72(5):616-23.	x
16817630	The effect of conventional and sustained delivery of thymoquinone and levodopa on SH-SY5Y human neuroblastoma cells	Martin TM, Benghuzzi H, Tucci M.	Biomed Sci Instrum.	2006	42:332-7.	Not accessible
16819171	Monocyte-mediated rotenone neurotoxicity towards human neuroblastoma SH-SY5Y: role of mitogen-activated protein kinases	Zhao FL, Hu JH, Zhu XZ.	Biol Pharm Bull.	2006 Jul	29(7):1372-7.	x
16819177	Parkinsonism-preventing activity of 1-methyl-1,2,3,4-tetrahydroisoquinoline derivatives in C57BL mouse in vivo	Okuda K, Kotake Y, Ohta S.	Biol Pharm Bull.	2006 Jul	29(7):1401-3.	SH-SY5Y used in previous studies
16837855	Cellular parkin mutants are soluble under non-stress conditions	Jensen LD, Vinther-Jensen T, Kahns S, Sundbye S, Jensen PH.	Neuroreport.	2006 Jul 31	17(11):1205-8.	x
16860391	Cytotoxicity of 17 tetrahydroisoquinoline derivatives in SH-SY5Y human neuroblastoma cells is related to mitochondrial NADH-ubiquinone oxidoreductase inhibition	Kotake Y, Sekiya Y, Okuda K, Ohta S.	Neurotoxicology.	2007 Jan	28(1):27-32.	x
16860563	PARK7 DJ-1 protects against degeneration of nigral dopaminergic neurons in Parkinson's disease rat model	Inden M, Taira T, Kitamura Y, Yanagida T, Tsuchiya D, Takata K, Yanagisawa D, Nishimura K, Taniguchi T, Kiso Y, Yoshimoto K, Agatsuma T, Koide-Yoshida S, Iguchi-Ariga SM, Shimohama S, Ariga H.	Neurobiol Dis.	2006 Oct	24(1):144-58.	x
16868795	Cytotoxicity of chloral-derived beta-carbolines is not specific towards neuronal nor dopaminergic cells	Storch A, Hwang YI, Bringmann G, Feineis D, Ott S, BrÃ¼ckner R, Schwarz J.	J Neural Transm (Vienna).	2006 Dec	113(12):1895-901.	x
16876317	The role of tissue transglutaminase in 1-methyl-4-phenylpyridinium (MPP+)-induced toxicity in differentiated human SH-SY5Y neuroblastoma cells	Beck KE, De Girolamo LA, Griffin M, Billett EE.	Neurosci Lett.	2006 Sep 11	405(1-2):46-51.	x
16917840	D-beta-hydroxybutyrate protects dopaminergic SH-SY5Y cells in a rotenone model of Parkinson's disease	Imamura K, Takeshima T, Kashiwaya Y, Nakaso K, Nakashima K.	J Neurosci Res.	2006 Nov 1	84(6):1376-84.	x
16935423	Specific cleavage of DJ-1 under an oxidative condition	Ooe H, Maita C, Maita H, Iguchi-Ariga SM, Ariga H.	Neurosci Lett.	2006 Oct 9	406(3):165-8.	x
16955485	Functional modulation of parkin through physical interaction with SUMO-1.	Um JW1, Chung KC.	J Neurosci Res.	2006 Nov 15	84(7):1543-54	x
16959469	Isolation, expression, and characterization of the human ZCRB1 gene mapped to 12q12	Wang H, Gao MX, Li L, Wang B, Hori N, Sato K.	Genomics.	2007 Jan	89(1):59-69.	Not PD specific
16978583	alpha-Synuclein protects SH-SY5Y cells from dopamine toxicity	Colapinto M, Mila S, Giraudo S, Stefanazzi P, Molteni M, Rossetti C, Bergamasco B, Lopiano L, Fasano M.	Biochem Biophys Res Commun.	2006 Nov 3	349(4):1294-300.	x
16978807	Overexpression of NQO1 protects human SK-N-MC neuroblastoma cells against dopamine-induced cell death.	Zafar KS1, Inayat-Hussain SH, Siegel D, Bao A, Shieh B, Ross D.	Toxicol Lett.	2006 Oct 25	166(3):261-7	Neuroblastoma, not SH-SY5Y
16980962	Kinase activity of mutant LRRK2 mediates neuronal toxicity.	Smith WW1, Pei Z, Jiang H, Dawson VL, Dawson TM, Ross CA.	Nat Neurosci.	2006 Oct	9(10):1231-3	x
16987221	Induction of parkin expression in the presence of oxidative stress	Yang YX, Muqit MM, Latchman DS.	Eur J Neurosci.	2006 Sep	24(5):1366-72.	x
17000465	The neurotoxin, MPP+, induces hyperphosphorylation of Tau, in the presence of alpha-Synuclein, in SH-SY5Y neuroblastoma cells	Duka T, Sidhu A.	Neurotox Res.	2006 Aug	10(1):1-10.	x
17000703	C-terminal truncation and Parkinson's disease-associated mutations down-regulate the protein serine/threonine kinase activity of PTEN-induced kinase-1.	Sim CH1, Lio DS, Mok SS, Masters CL, Hill AF, Culvenor JG, Cheng HC.	Hum Mol Genet.	2006 Nov 1	15(21):3251-62	Neuroblastoma used on other studies
17005870	Cytosolic catechols inhibit alpha-synuclein aggregation and facilitate the formation of intracellular soluble oligomeric intermediates.	Mazzulli JR1, Mishizen AJ, Giasson BI, Lynch DR, Thomas SA, Nakashima A, Nagatsu T, Ota A, Ischiropoulos H.	J Neurosci.	2006 Sep 27	26(39):10068-78	x
17017519	The effect of neuromelanin on the proteasome activity in human dopaminergic SH-SY5Y cells	Maruyama W, Shamoto-Nagai M, Akao Y, Riederer P, Naoi M.	J Neural Transm Suppl.	2006	(70):125-32.	Not accessible
17017568	Involvement of multiple survival signal transduction pathways in the neuroprotective, neurorescue and APP processing activity of rasagiline and its propargyl moiety	Weinreb O, Amit T, Bar-Am O, Sagi Y, Mandel S, Youdim MB.	J Neural Transm Suppl.	2006	(70):457-65.	Review
17020749	A glial cell line-derived neurotrophic factor (GDNF):tetanus toxin fragment C protein conjugate improves delivery of GDNF to spinal cord motor neurons in mice.	Larsen KE1, Benn SC, Ay I, Chian RJ, Celia SA, Remington MP, Bejarano M, Liu M, Ross J, Carmillo P, Sah D, Phillips KA, Sulzer D, Pepinsky RB, Fishman PS, Brown RH Jr, Francis JW.	Brain Res.	2006 Nov 20	1120(1):1-12	Neuroblastoma, not SH-SY5Y
17021400	LRRK2 expression in normal and pathologic human brain and in human cell lines.	Miklossy J1, Arai T, Guo JP, Klegeris A, Yu S, McGeer EG, McGeer PL.	J Neuropathol Exp Neurol.	2006 Oct	65(10):953-63	x
17028430	Differentiated dopaminergic MN9D cells only partially recapitulate the electrophysiological properties of midbrain dopaminergic neurons.	Rick CE1, Ebert A, Virag T, Bohn MC, Surmeier DJ.	Dev Neurosci.	2006	28(6):528-37	Neuroblastoma, not SH-SY5Y
17055540	The novel squamosamide derivative (compound FLZ) attenuated 1-methyl, 4-phenyl-pyridinium ion (MPP+)-induced apoptosis and alternations of related signal transduction in SH-SY5Y cells	Zhang D, Zhang JJ, Liu GT.	Neuropharmacology.	2007 Feb	52(2):423-9.	x
17055645	Inhibitor of double stranded RNA-dependent protein kinase protects against cell damage induced by ER stress	Shimazawa M, Hara H.	Neurosci Lett.	2006 Dec 6	409(3):192-5.	Not PD specific
17064354	Mitochondrial damage modulates alternative splicing in neuronal cells: implications for neurodegeneration.	Maracchioni A1, Totaro A, Angelini DF, Di Penta A, Bernardi G, Carrì MT, Achsel T.	J Neurochem.	2007 Jan	100(1):142-53	Not PD specific
17111439	Beta-amyloid treatment of two complementary P301L tau-expressing Alzheimer's disease models reveals similar deregulated cellular processes.	David DC1, Ittner LM, Gehrig P, Nergenau D, Shepherd C, Halliday G, Götz J.	Proteomics.	2006 Dec	6(24):6566-77	Not PD specific
17117479	Regulation of cyclin-dependent kinase 5 and p53 by ERK1/2 pathway in the DNA damage-induced neuronal death	Lee JH, Kim KT.	J Cell Physiol.	2007 Mar	210(3):784-97.	Not PD specific
17131421	RNA interference-mediated knockdown of alpha-synuclein protects human dopaminergic neuroblastoma cells from MPP(+) toxicity and reduces dopamine transport.	Fountaine TM1, Wade-Martins R.	J Neurosci Res.	2007 Feb 1	85(2):351-63	x
17135412	Transplantation of human neural stem cells exerts neuroprotection in a rat model of Parkinson's disease	Yasuhara T, Matsukawa N, Hara K, Yu G, Xu L, Maki M, Kim SU, Borlongan CV.	J Neurosci.	2006 Nov 29	26(48):12497-511.	x
17136323	Dopaminergic and adrenergic toxicities on SK-N-MC human neuroblastoma cells are mediated through G protein signaling and oxidative stress.	Chan AS1, Ng LW, Poon LS, Chan WW, Wong YH.	Apoptosis.	2007 Jan	12(1):167-79	Not PD specific
17144902	Therapeutic targets and potential of the novel brain- permeable multifunctional iron chelator-monoamine oxidase inhibitor drug, M-30, for the treatment of Alzheimer's disease	Avramovich-Tirosh Y, Amit T, Bar-Am O, Zheng H, Fridkin M, Youdim MB.	J Neurochem.	2007 Jan	100(2):490-502.	Not PD specific
17166628	Alpha-synuclein activates stress signaling protein kinases in THP-1 cells and microglia	Klegeris A, Pelech S, Giasson BI, Maguire J, Zhang H, McGeer EG, McGeer PL.	Neurobiol Aging.	2008 May	29(5):739-52.	x
17167170	Neuroprotective efficacy of the peroxisome proliferator-activated receptor delta-selective agonists in vitro and in vivo	Iwashita A, Muramatsu Y, Yamazaki T, Muramoto M, Kita Y, Yamazaki S, Mihara K, Moriguchi A, Matsuoka N.	J Pharmacol Exp Ther.	2007 Mar	320(3):1087-96.	x
17169462	Implication of PTEN in production of reactive oxygen species and neuronal death in in vitro models of stroke and Parkinson's disease	Zhu Y, Hoell P, Ahlemeyer B, Sure U, Bertalanffy H, Krieglstein J.	Neurochem Int.	2007 Feb	50(3):507-16.	x
17174285	Pyruvate protects mitochondria from oxidative stress in human neuroblastoma SK-N-SH cells.	Wang X1, Perez E, Liu R, Yan LJ, Mallet RT, Yang SH.	Brain Res.	2007 Feb 9	1132(1):1-9	Not PD specific
17197368	Implications of co-morbidity for etiology and treatment of neurodegenerative diseases with multifunctional neuroprotective-neurorescue drugs; ladostigil.	Youdim MB1, Amit T, Bar-Am O, Weinreb O, Yogev-Falach M.	Neurotox Res.	2006 Dec	10(3-4):181-92	Not PD specific
17240529	SAG protects human neuroblastoma SH-SY5Y cells against 1-methyl-4-phenylpyridinium ion (MPP+)-induced cytotoxicity via the downregulation of ROS generation and JNK signaling	Kim SY, Kim MY, Mo JS, Park JW, Park HS.	Neurosci Lett.	2007 Feb 14	413(2):132-6.	x
17241123	Mechanism of toxicity of pesticides acting at complex I: relevance to environmental etiologies of Parkinson's disease.	Sherer TB1, Richardson JR, Testa CM, Seo BB, Panov AV, Yagi T, Matsuno-Yagi A, Miller GW, Greenamyre JT.	J Neurochem.	2007 Mar	100(6):1469-79	Neuroblastoma, not SH-SY5Y
17266988	Rosiglitazone protects human neuroblastoma SH-SY5Y cells against MPP+ induced cytotoxicity via inhibition of mitochondrial dysfunction and ROS production	Jung TW, Lee JY, Shim WS, Kang ES, Kim SK, Ahn CW, Lee HC, Cha BS.	J Neurol Sci.	2007 Feb 15	253(1-2):53-60.	x
17268850	Salsolinol, an endogenous neurotoxin, activates JNK and NF-kappaB signaling pathways in human neuroblastoma cells	Wanpen S, Kooncumchoo P, Shavali S, Govitrapong P, Ebadi M.	Neurochem Res.	2007 Mar	32(3):443-50.	x
17309119	Exposure to mixtures of endosulfan and zineb induces apoptotic and necrotic cell death in SH-SY5Y neuroblastoma cells, in vitro	Jia Z, Misra HP.	J Appl Toxicol.	2007 Sep-Oct	27(5):434-46.	x
17324951	Activation of c-Jun N-terminal protein kinase is a common mechanism underlying paraquat- and rotenone-induced dopaminergic cell apoptosis	Klintworth H, Newhouse K, Li T, Choi WS, Faigle R, Xia Z.	Toxicol Sci.	2007 May	97(1):149-62.	x
17330988	Does ORP150/HSP12A protect dopaminergic neurons against MPTP/MPP(+)-induced neurotoxicity?	Kitao Y, Matsuyama T, Takano K, Tabata Y, Yoshimoto T, Momoi T, Yamatodani A, Ogawa S, Hori O.	Antioxid Redox Signal.	2007 May	9(5):589-95.	x
17337120	Alpha-synuclein overexpression reduces gap junctional intercellular communication in dopaminergic neuroblastoma cells	Sung JY, Lee HJ, Jeong EI, Oh Y, Park J, Kang KS, Chung KC.	Neurosci Lett.	2007 Apr 18	416(3):289-93.	x
17341480	Inhibition of paraquat-induced autophagy accelerates the apoptotic cell death in neuroblastoma SH-SY5Y cells	GonzÃ¡lez-Polo RA, Niso-Santano M, OrtÃ­z-OrtÃ­z MA, GÃ³mez-MartÃ­n A, MorÃ¡n JM, GarcÃ­a-Rubio L, Francisco-Morcillo J, Zaragoza C, Soler G, Fuentes JM.	Toxicol Sci.	2007 Jun	97(2):448-58.	x
17344309	Upregulation of gamma-glutamate-cysteine ligase as part of the long-term adaptation process to iron accumulation in neuronal SH-SY5Y cells	Aguirre P, ValdÃ©s P, Aracena-Parks P, Tapia V, NÃºÃ±ez MT.	Am J Physiol Cell Physiol.	2007 Jun	292(6):C2197-203.	x
17350004	Overexpression of pitx3 upregulates expression of BDNF and GDNF in SH-SY5Y cells and primary ventral mesencephalic cultures	Peng C, Fan S, Li X, Fan X, Ming M, Sun Z, Le W.	FEBS Lett.	2007 Apr 3	581(7):1357-61.	x
17359966	The novel squamosamide derivative FLZ protects against 6-hydroxydopamine-induced apoptosis through inhibition of related signal transduction in SH-SY5Y cells	Zhang D, Zhang JJ, Liu GT.	Eur J Pharmacol.	2007 Apr 30	561(1-3):1-6.	x
17360705	Assembly of lysine 63-linked ubiquitin conjugates by phosphorylated alpha-synuclein implies Lewy body biogenesis.	Liu C1, Fei E, Jia N, Wang H, Tao R, Iwata A, Nukina N, Zhou J, Wang G.	J Biol Chem.	2007 May 11	282(19):14558-66	Neuroblastoma, not SH-SY5Y
17433543	Mangiferin protects against 1-methyl-4-phenylpyridinium toxicity mediated by oxidative stress in N2A cells.	Amazzal L1, Lapôtre A, Quignon F, Bagrel D.	Neurosci Lett.	2007 May 17	418(2):159-64	Neuroblastoma, not SH-SY5Y
17438367	Relationship between autophagy and apoptotic cell death in human neuroblastoma cells treated with paraquat: could autophagy be a "brake" in paraquat-induced apoptotic death?	González-Polo RA1, Niso-Santano M, Ortíz-Ortíz MA, Gómez-Martín A, Morán JM, García-Rubio L, Francisco-Morcillo J, Zaragoza C, Soler G, Fuentes JM.	Autophagy.	2007 Jul-Aug	3(4):366-7	Comment
17439717	A cell-based model of alpha-synucleinopathy for screening compounds with therapeutic potential of Parkinson's disease	Zhao DL, Zou LB, Zhou LF, Zhu P, Zhu HB.	Acta Pharmacol Sin.	2007 May	28(5):616-26.	x
17447417	Involvement of type A monoamine oxidase in neurodegeneration: regulation of mitochondrial signaling leading to cell death or neuroprotection	Naoi M, Maruyama W, Akao Y, Yi H, Yamaoka Y.	J Neural Transm Suppl.	2006	(71):67-77.	Not accessible
17447427	Novel neuroprotective neurotrophic NAP analogs targeting metal toxicity and oxidative stress: potential candidates for the control of neurodegenerative diseases	Zheng H, Blat D, Fridkin M.	J Neural Transm Suppl.	2006	(71):163-72.	Not accessible
17465879	Cell type-specific upregulation of Parkin in response to ER stress	Wang HQ, Imai Y, Kataoka A, Takahashi R.	Antioxid Redox Signal.	2007 May	9(5):533-42.	x
17472700	Differential effects of Parkin and its mutants on protein aggregation, the ubiquitin-proteasome system, and neuronal cell death in human neuroblastoma cells.	Kyratzi E1, Pavlaki M, Kontostavlaki D, Rideout HJ, Stefanis L.	J Neurochem.	2007 Aug	102(4):1292-303	x
17475405	Dopaminergic differentiation of human mesenchymal stem cells--utilization of bioassay for tyrosine hydroxylase expression	Kan I, Ben-Zur T, Barhum Y, Levy YS, Burstein A, Charlow T, Bulvik S, Melamed E, Offen D.	Neurosci Lett.	2007 May 23	419(1):28-33.	Use of SH-SY5Y to confirm the expression of a reporter plasmid
17481595	Rotenone-induced neurotoxicity of THP-1 cells requires production of reactive oxygen species and activation of phosphatidylinositol 3-kinase	Hu JH, Zhu XZ.	Brain Res.	2007 Jun 11	1153:12-9.	x
17482356	Modulation of tyrosine hydroxylase expression by melatonin in human SH-SY5Y neuroblastoma cells	McMillan CR, Sharma R, Ottenhof T, Niles LP.	Neurosci Lett.	2007 Jun 4	419(3):202-6.	x
17492795	Neuroprotective effects of pituitary adenylate cyclase-activating polypeptide (PACAP) in MPP+-induced alteration of translational control in Neuro-2a neuroblastoma cells.	Deguil J1, Jailloux D, Page G, Fauconneau B, Houeto JL, Philippe M, Muller JM, Pain S.	J Neurosci Res.	2007 Jul	85(9):2017-25	Neuroblastoma, not SH-SY5Y
17512523	Parkin interacts with LIM Kinase 1 and reduces its cofilin-phosphorylation activity via ubiquitination	Lim MK, Kawamura T, Ohsawa Y, Ohtsubo M, Asakawa S, Takayanagi A, Shimizu N.	Exp Cell Res.	2007 Aug 1	313(13):2858-74.	x
17513200	Antiapoptotic effects of nicotine in its protection against salsolinol-induced cytotoxicity	Copeland RL Jr, Das JR, Kanaan YM, Taylor RE, Tizabi Y.	Neurotox Res.	2007 Jul	12(1):61-9.	x
17515111	[Inhibition of neuronal death by promoting degradation of intracellular amyloid beta-protein]	Ohyagi Y, Miyoshi K, Ma L, Motomura K, Kira J.	Nihon Shinkei Seishin Yakurigaku Zasshi.	2007 Apr	27(2):57-62.	Japanese
17554782	Tilted properties of the 67-78 fragment of alpha-synuclein are responsible for membrane destabilization and neurotoxicity.	Crowet JM1, Lins L, Dupiereux I, Elmoualija B, Lorin A, Charloteaux B, Stroobant V, Heinen E, Brasseur R.	Proteins.	2007 Sep 1	68(4):936-47	x
17560944	Role of cyclooxygenase-2 in tetrahydrobiopterin-induced dopamine oxidation	Chae SW, Bang YJ, Kim KM, Lee KY, Kang BY, Kim EM, Inoue H, Hwang O, Choi HJ.	Biochem Biophys Res Commun.	2007 Aug 3	359(3):735-41.	x
17572405	Pramipexole prevents neurotoxicity induced by oligomers of beta-amyloid.	Uberti D1, Bianchi I, Olivari L, Ferrari-Toninelli G, Canonico P, Memo M.	Eur J Pharmacol.	2007 Aug 27	569(3):194-6	Not PD specific
17593950	Inhibitory effect of polyunsaturated fatty acids on apoptosis induced by etoposide, okadaic acid and AraC in Neuro2a cells.	Wu Y1, Tada M, Takahata K, Tomizawa K, Matsui H.	Acta Med Okayama.	2007 Jun	61(3):147-52	Not PD specific
17603292	Resveratrol protects SH-SY5Y neuroblastoma cells from apoptosis induced by dopamine	Lee MK, Kang SJ, Poncz M, Song KJ, Park KS.	Exp Mol Med.	2007 Jun 30	39(3):376-84.	x
17622797	Beclin 1-independent pathway of damage-induced mitophagy and autophagic stress: implications for neurodegeneration and cell death.	Chu CT1, Zhu J, Dagda R.	Autophagy.	2007 Nov-Dec	3(6):663-6	Review
17623045	The Akt/GSK-3beta axis as a new signaling pathway of the histamine H(3) receptor.	Bongers G1, Sallmen T, Passani MB, Mariottini C, Wendelin D, Lozada A, Marle Av, Navis M, Blandina P, Bakker RA, Panula P, Leurs R.	J Neurochem.	2007 Oct	103(1):248-58	Not PD specific
17631803	[Protecting effect of Cistanche extracts on MPP+-induced injury of the Parkinson's disease cell model]	Wang H, Li WW, Cai DF, Yang R.	Zhong Xi Yi Jie He Xue Bao.	2007 Jul	5(4):407-11.	Chinese
17635668	Aminoindan and hydroxyaminoindan, metabolites of rasagiline and ladostigil, respectively, exert neuroprotective properties in vitro.	Bar-Am O1, Amit T, Youdim MB.	J Neurochem.	2007 Oct	103(2):500-8	Neuroblastoma, not SH-SY5Y
17640565	A novel approach of proteomics and transcriptomics to study the mechanism of action of the antioxidant-iron chelator green tea polyphenol (-)-epigallocatechin-3-gallate	Weinreb O, Amit T, Youdim MB.	Free Radic Biol Med.	2007 Aug 15	43(4):546-56.	Not PD specific
17645689	Melatonin inhibits MPP+-induced caspase-mediated death pathway and DNA fragmentation factor-45 cleavage in SK-N-SH cultured cells.	Chetsawang J1, Govitrapong P, Chetsawang B.	J Pineal Res.	2007 Sep	43(2):115-20	Neuroblastoma, not SH-SY5Y
17666870	[Molecular mechanism of neuroprotective drugs against oxidative stress-induced neuronal cell death]	Hara H.	Yakugaku Zasshi.	2007 Aug	127(8):1199-205.	Review; Japanese
17672970	[Effect of 6-hydroxydopamine on the levels of phosphorylation of signal transduction and transcription factor 1 and 3: experiment with dopaminergic neurons]	Wang LL, Chen B, Xu SL.	Zhonghua Yi Xue Za Zhi.	2007 Apr 17	87(15):1048-52.	Review; Japanese
17680997	The neuroprotective effect of Activin A and B: implication for neurodegenerative diseases	Kupershmidt L, Amit T, Bar-Am O, Youdim MB, Blumenfeld Z.	J Neurochem.	2007 Nov	103(3):962-71.	x
17681692	Nurr1 is phosphorylated by ERK2 in vitro and its phosphorylation upregulates tyrosine hydroxylase expression in SH-SY5Y cells	Zhang T, Jia N, Fei E, Wang P, Liao Z, Ding L, Yan M, Nukina N, Zhou J, Wang G.	Neurosci Lett.	2007 Aug 16	423(2):118-22.	x
17712623	Overexpressed alpha-synuclein regulated the nuclear factor-kappaB signal pathway	Yuan Y, Jin J, Yang B, Zhang W, Hu J, Zhang Y, Chen NH.	Cell Mol Neurobiol.	2008 Jan	28(1):21-33.	x
17715357	Different species of alpha-synuclein oligomers induce calcium influx and seeding.	Danzer KM1, Haasen D, Karow AR, Moussaud S, Habeck M, Giese A, Kretzschmar H, Hengerer B, Kostka M.	J Neurosci.	2007 Aug 22	27(34):9220-32	x
17726156	Mitochondrial complex I inhibitor rotenone-elicited dopamine redistribution from vesicles to cytosol in human dopaminergic SH-SY5Y cells	Watabe M, Nakaki T.	J Pharmacol Exp Ther.	2007 Nov	323(2):499-507.	x
17785456	Cellular oligomerization of alpha-synuclein is determined by the interaction of oxidized catechols with a C-terminal sequence.	Mazzulli JR1, Armakola M, Dumoulin M, Parastatidis I, Ischiropoulos H.	J Biol Chem.	2007 Oct 26	282(43):31621-30	x
17882163	DJ-1 protects against neurodegeneration caused by focal cerebral ischemia and reperfusion in rats	Yanagisawa D, Kitamura Y, Inden M, Takata K, Taniguchi T, Morikawa S, Morita M, Inubushi T, Tooyama I, Taira T, Iguchi-Ariga SM, Akaike A, Ariga H.	J Cereb Blood Flow Metab.	2008 Mar	28(3):563-78.	x
17884684	Salvianolic acid B, an antioxidant from Salvia miltiorrhiza, prevents 6-hydroxydopamine induced apoptosis in SH-SY5Y cells	Tian LL, Wang XJ, Sun YN, Li CR, Xing YL, Zhao HB, Duan M, Zhou Z, Wang SQ.	Int J Biochem Cell Biol.	2008	40(3):409-22.	x
17890097	A Nurr1 point mutant, implicated in Parkinson's disease, uncouples ERK1/2-dependent regulation of tyrosine hydroxylase transcription.	Jacobsen KX1, MacDonald H, Lemonde S, Daigle M, Grimes DA, Bulman DE, Albert PR.	Neurobiol Dis.	2008 Jan	29(1):117-22	Neuroblastoma, not SH-SY5Y
17894646	Lig-8, a highly bioactive lignophenol derivative from bamboo lignin, exhibits multifaceted neuroprotective activity	Ito Y, Akao Y, Shimazawa M, Seki N, Nozawa Y, Hara H.	CNS Drug Rev.	2007 Fall	13(3):296-307.	Review
17900545	Epigallocatechin gallate (EGCG) potentiates the cytotoxicity of rotenone in neuroblastoma SH-SY5Y cells	Chung WG, Miranda CL, Maier CS.	Brain Res.	2007 Oct 24	1176:133-42.	x
17904593	Anti-apoptotic effect of esculin on dopamine-induced cytotoxicity in the human neuroblastoma SH-SY5Y cell line	Zhao DL, Zou LB, Lin S, Shi JG, Zhu HB.	Neuropharmacology.	2007 Nov	53(6):724-32.	x
17908043	Neurorescue activity, APP regulation and amyloid-beta peptide reduction by novel multi-functional brain permeable iron- chelating- antioxidants, M-30 and green tea polyphenol, EGCG	Avramovich-Tirosh Y, Reznichenko L, Mit T, Zheng H, Fridkin M, Weinreb O, Mandel S, Youdim MB.	Curr Alzheimer Res.	2007 Sep	4(4):403-11.	Not accessible
17913302	9-Methyl-beta-carboline up-regulates the appearance of differentiated dopaminergic neurones in primary mesencephalic culture	Hamann J, Wernicke C, Lehmann J, Reichmann H, Rommelspacher H, Gille G.	Neurochem Int.	2008 Mar-Apr	52(4-5):688-700.	x
17913843	A dibenzoylmethane derivative protects dopaminergic neurons against both oxidative stress and endoplasmic reticulum stress	Takano K, Kitao Y, Tabata Y, Miura H, Sato K, Takuma K, Yamada K, Hibino S, Choshi T, Iinuma M, Suzuki H, Murakami R, Yamada M, Ogawa S, Hori O.	Am J Physiol Cell Physiol.	2007 Dec	293(6):C1884-94.	x
17921876	Dopamine induces TNFalpha and TNF-R1 expression in SH-SY5Y human neuroblastoma cells	GÃ³mez-Santos C, Francisco R, GimÃ©nez-Xavier P, Ambrosio S.	Neuroreport.	2007 Oct 29	18(16):1725-8.	x
17934957	The bipyridyl herbicide paraquat induces proteasome dysfunction in human neuroblastoma SH-SY5Y cells	Yang W, Tiffany-Castiglioni E.	J Toxicol Environ Health A.	2007 Nov	70(21):1849-57.	Not accessible
17961515	Constitutive expression and functional characterization of mitochondrial glutaredoxin (Grx2) in mouse and human brain.	Karunakaran S1, Saeed U, Ramakrishnan S, Koumar RC, Ravindranath V.	Brain Res.	2007 Dec 14	1185:8-17	Neuroblastoma, not SH-SY5Y
17975304	Protective effect of (+/-) isoborneol against 6-OHDA-induced apoptosis in SH-SY5Y cells	Tian LL, Zhou Z, Zhang Q, Sun YN, Li CR, Cheng CH, Zhong ZY, Wang SQ.	Cell Physiol Biochem.	2007	20(6):1019-32.	x
17982873	Neuronal differentiation and long-term culture of the human neuroblastoma line SH-SY5Y	Constantinescu R, Constantinescu AT, Reichmann H, Janetzky B.	J Neural Transm Suppl.	2007	(72):17-28.	x
17982885	Neuroprotection by propargylamines in Parkinson's disease: intracellular mechanism underlying the anti-apoptotic function and search for clinical markers.	Naoi M1, Maruyama W, Yi H, Akao Y, Yamaoka Y, Shamoto-Nagai M.	J Neural Transm Suppl.	2007	(72):121-31	Not accessible
17985233	Inhibition of vesicular monoamine transporter-2 activity in alpha-synuclein stably transfected SH-SY5Y cells	Guo JT, Chen AQ, Kong Q, Zhu H, Ma CM, Qin C.	Cell Mol Neurobiol.	2008 Jan	28(1):35-47.	x
17987632	Optimizing separation efficiency of 2-DE procedures for visualization of different superoxide dismutase forms in a cellular model of amyotrophic lateral sclerosis	Di Poto C, Iadarola P, Salvini R, Passadore I, Cereda C, Ceroni M, Bardoni AM.	Electrophoresis.	2007 Dec	28(23):4340-7.	Not PD specific
17995935	Membrane-permeable Bcl-xL prevents MPTP-induced dopaminergic neuronal loss in the substantia nigra.	Dietz GP1, Stockhausen KV, Dietz B, Falkenburger BH, Valbuena P, Opazo F, Lingor P, Meuer K, Weishaupt JH, Schulz JB, Bähr M.	J Neurochem.	2008 Feb	104(3):757-65	x
17996028	6-Hydroxydopamine activates the mitochondrial apoptosis pathway through p38 MAPK-mediated, p53-independent activation of Bax and PUMA	Gomez-Lazaro M, Galindo MF, Concannon CG, Segura MF, Fernandez-Gomez FJ, Llecha N, Comella JX, Prehn JH, Jordan J.	J Neurochem.	2008 Mar	104(6):1599-612.	x
17996721	Dopamine modulates mitochondrial function in viable SH-SY5Y cells possibly via its interaction with complex I: relevance to dopamine pathology in schizophrenia	Brenner-Lavie H, Klein E, Zuk R, Gazawi H, Ljubuncic P, Ben-Shachar D.	Biochim Biophys Acta.	2008 Feb	1777(2):173-85.	Not PD specific
18021296	Assessment of the direct and indirect effects of MPP+ and dopamine on the human proteasome: implications for Parkinson's disease aetiology	Caneda-FerrÃ³n B, De Girolamo LA, Costa T, Beck KE, Layfield R, Billett EE.	J Neurochem.	2008 Apr	105(1):225-38.	x
18049867	Pitx3 promoter directs Cre-recombinase specifically in a human neuroblastoma cell line	Castillo-Carranza DL, RodrÃ­guez-Rocha H, Montes-de-Oca-Luna R, SepÃºlveda-Saavedra J, MartÃ­nez HR, LÃ³pez-Vidal Y, Saucedo-CÃ¡rdenas O.	Mol Cell Biochem.	2008 Feb	309(1-2):223-7.	Not PD specific
18078312	A Novel iron-chelating derivative of the neuroprotective peptide NAPVSIPQ shows superior antioxidant and antineurodegenerative capabilities.	Blat D1, Weiner L, Youdim MB, Fridkin M.	J Med Chem.	2008 Jan 10	51(1):126-34	Not PD specific
18079140	Synergistic neurotoxic effects of arsenic and dopamine in human dopaminergic neuroblastoma SH-SY5Y cells	Shavali S, Sens DA.	Toxicol Sci.	2008 Apr	102(2):254-61.	x
18090214	Study of 99mTc-annexin V uptake in apoptotic cell models of Parkinson's disease	Cao W, Huang J, Wu J, Cao G, He Y, Hu D, Sun S, An R, Zhang Y.	Nucl Med Commun.	2007 Dec	28(12):895-901.	x
18097693	RNA interference of LRRK2-microarray expression analysis of a Parkinson's disease key player	HÃ¤big K, Walter M, Poths S, Riess O, Bonin M.	Neurogenetics.	2008 May	9(2):83-94.	x
18160328	Clioquinol inhibits peroxide-mediated toxicity through up-regulation of phosphoinositol-3-kinase and inhibition of p53 activity.	Filiz G1, Caragounis A, Bica L, Du T, Masters CL, Crouch PJ, White AR.	Int J Biochem Cell Biol.	2008	40(5):1030-42	Not PD specific
18172548	Dopamine-modified alpha-synuclein blocks chaperone-mediated autophagy	Martinez-Vicente M, Talloczy Z, Kaushik S, Massey AC, Mazzulli J, Mosharov EV, Hodara R, Fredenburg R, Wu DC, Follenzi A, Dauer W, Przedborski S, Ischiropoulos H, Lansbury PT, Sulzer D, Cuervo AM.	J Clin Invest.	2008 Feb	118(2):777-88.	x
18177636	6,7-di-O-glucopyranosyl-esculetin protects SH-SY5Y cells from dopamine-induced cytotoxicity	Zhao DL, Zou LB, Lin S, Shi JG, Zhu HB.	Eur J Pharmacol.	2008 Feb 12	580(3):329-38.	x
18182047	Tat-Hsp70 protects dopaminergic neurons in midbrain cultures and in the substantia nigra in models of Parkinson's disease.	Nagel F1, Falkenburger BH, Tönges L, Kowsky S, Pöppelmeyer C, Schulz JB, Bähr M, Dietz GP.	J Neurochem.	2008 May	105(3):853-64	Use of the cell line to determine the transduction efficiency
18182054	Role of autophagy in G2019S-LRRK2-associated neurite shortening in differentiated SH-SY5Y cells	Plowey ED, Cherra SJ 3rd, Liu YJ, Chu CT.	J Neurochem.	2008 May	105(3):1048-56.	x
18189141	Curcumin inhibits aggregation of alpha-synuclein	Pandey N, Strider J, Nolan WC, Yan SX, Galvin JE.	Acta Neuropathol.	2008 Apr	115(4):479-89.	x
18190519	Parkin occurs in a stable, non-covalent, approximately 110-kDa complex in brain	Van Humbeeck C, Waelkens E, Corti O, Brice A, Vandenberghe W.	Eur J Neurosci.	2008 Jan	27(2):284-93.	x
18191903	Sequential and concerted gene expression changes in a chronic in vitro model of parkinsonism.	Greene JG1, Greenamyre JT, Dingledine R.	Neuroscience.	2008 Mar 3	152(1):198-207	Neuroblastoma, not SH-SY5Y
18201823	Caffeine activates the PI3K/Akt pathway and prevents apoptotic cell death in a Parkinson's disease model of SH-SY5Y cells	Nakaso K, Ito S, Nakashima K.	Neurosci Lett.	2008 Feb 20	432(2):146-50.	x
18211800	The application of proteomics for studying the neurorescue activity of the polyphenol (-)-epigallocatechin-3-gallate	Weinreb O, Amit T, Youdim MB.	Arch Biochem Biophys.	2008 Aug 15	476(2):152-60.	Not PD specific
18234165	Potent induction of total cellular GSH and NQO1 as well as mitochondrial GSH by 3H-1,2-dithiole-3-thione in SH-SY5Y neuroblastoma cells and primary human neurons: protection against neurocytotoxicity elicited by dopamine, 6-hydroxydopamine, 4-hydroxy-2-nonenal, or hydrogen peroxide	Jia Z, Zhu H, Misra HP, Li Y.	Brain Res.	2008 Mar 4	1197:159-69.	x
18237459	Selegiline reduces cisplatin-induced neuronal death in neuroblastoma cells.	Müller T1, Przuntek H, Rieks M, Mackowiak A.	Neurol Res.	2008 May	30(4):417-9	x
18241847	Effects of the extract of Anemopaegma mirandum (Catuaba) on Rotenone-induced apoptosis in human neuroblastomas SH-SY5Y cells	Valverde G De Andrade D, Madureira de Oliveria D, Barreto G, Bertolino LA, Saraceno E, Capani F, Giraldez LD.	Brain Res.	2008 Mar 10	1198:188-96.	x
18242171	D2/D3 receptor agonist ropinirole protects dopaminergic cell line against rotenone-induced apoptosis through inhibition of caspase- and JNK-dependent pathways	Chen S, Zhang X, Yang D, Du Y, Li L, Li X, Ming M, Le W.	FEBS Lett.	2008 Mar 5	582(5):603-10.	x
18248328	Small-interfering-RNA-mediated silencing of human glutamate dehydrogenase induces apoptosis in neuroblastoma cells.	Choi MM1, Kim EA, Huh JW, Choi SY, Cho SW, Yang SJ.	Biotechnol Appl Biochem.	2008 Oct	51(Pt 2):107-10	Not PD specific
18248610	Parkin protects against tyrosinase-mediated dopamine neurotoxicity by suppressing stress-activated protein kinase pathways	Hasegawa T, Treis A, Patenge N, Fiesel FC, Springer W, Kahle PJ.	J Neurochem.	2008 Jun	105(5):1700-15.	x
18253895	Paraquat-induced apoptosis in human neuroblastoma SH-SY5Y cells: involvement of p53 and mitochondria	Yang W, Tiffany-Castiglioni E.	J Toxicol Environ Health A.	2008	71(4):289-99.	Not accessible
18262354	Silencing of peroxiredoxin 3 and peroxiredoxin 5 reveals the role of mitochondrial peroxiredoxins in the protection of human neuroblastoma SH-SY5Y cells toward MPP+	De Simoni S, Goemaere J, Knoops B.	Neurosci Lett.	2008 Mar 15	433(3):219-24.	x
18279803	Suppressive effects of flavonoid fisetin on lipopolysaccharide-induced microglial activation and neurotoxicity.	Zheng LT1, Ock J, Kwon BM, Suk K.	Int Immunopharmacol.	2008 Mar	8(3):484-94	Not PD specific
18292964	Microarray expression analysis reveals genetic pathways implicated in C621 synphilin-1-mediated toxicity	Bonin M, Marx FP, Kautzmann S, Riess O, KrÃ¼ger R.	J Neural Transm (Vienna).	2008 Jul	115(7):941-58.	x
18293395	Prolyl endopeptidase is revealed following SILAC analysis to be a novel mediator of human microglial and THP-1 cell neurotoxicity	Klegeris A, Li J, Bammler TK, Jin J, Zhu D, Kashima DT, Pan S, Hashioka S, Maguire J, McGeer PL, Zhang J.	Glia.	2008 Apr 15	56(6):675-85.	Not PD specific
18304694	Inhibition of beta-amyloid peptide aggregation and neurotoxicity by alpha-d-mannosylglycerate, a natural extremolyte.	Ryu J1, Kanapathipillai M, Lentzen G, Park CB.	Peptides.	2008 Apr	29(4):578-84	Not PD specific
18314446	Association of NRH:quinone oxidoreductase 2 gene promoter polymorphism with higher gene expression and increased susceptibility to Parkinson's disease	Wang W, Le WD, Pan T, Stringer JL, Jaiswal AK.	J Gerontol A Biol Sci Med Sci.	2008 Feb	63(2):127-34.	x
18322384	Functional genomics dissects pathomechanisms in tauopathies: mitosis failure and unfolded protein response	GÃtz J, David D, Hoerndli F, Ke YD, Schonrock N, Wiesner A, Fath T, Bokhari L, Lim YA, Deters N, Ittner LM.	Neurodegener Dis.	2008	5(3-4):179-81.	Review
18325635	Microglial responses to dopamine in a cell culture model of Parkinson's disease	Mastroeni D, Grover A, Leonard B, Joyce JN, Coleman PD, Kozik B, Bellinger DL, Rogers J.	Neurobiol Aging.	2009 Nov	30(11):1805-17.	x
18329008	Lack of robust protective effect of quercetin in two types of 6-hydroxydopamine-induced parkinsonian models in rats and dopaminergic cell cultures	KÃ¤Ã¤riÃ¤inen TM, Piltonen M, Ossola B, Kekki H, Lehtonen S, Nenonen T, Lecklin A, Raasmaja A, MÃ¤nnistÃ PT.	Brain Res.	2008 Apr 8	1203:149-59.	x
18331475	Anti-apoptotic effect of Mao-B inhibitor PF9601N [N-(2-propynyl)-2-(5-benzyloxy-indolyl) methylamine] is mediated by p53 pathway inhibition in MPP+-treated SH-SY5Y human dopaminergic cells	Sanz E, Quintana A, Battaglia V, Toninello A, Hidalgo J, Ambrosio S, Valoti M, Marco JL, Tipton KF, Unzeta M.	J Neurochem.	2008 Jun 1	105(6):2404-17.	x
18331585	Neuroprotective actions of deferiprone in cultured cortical neurones and SHSY-5Y cells.	Molina-Holgado F1, Gaeta A, Francis PT, Williams RJ, Hider RC.	J Neurochem.	2008 Jun 1	105(6):2466-76	Not PD specific
18335520	Advanced glycation end products induce in vitro cross-linking of alpha-synuclein and accelerate the process of intracellular inclusion body formation	Shaikh S, Nicholson LF.	J Neurosci Res.	2008 Jul	86(9):2071-82.	x
18353281	BV-2 stimulation by lactacystin results in a strong inflammatory reaction and apoptotic neuronal death in SH-SY5Y cells	Kwon SJ, Ahn TB, Yoon MY, Jeon BS.	Brain Res.	2008 Apr 18	1205:116-21.	x
18355641	Differences between normal and alpha-synuclein overexpressing SH-SY5Y neuroblastoma cells after Abeta(1-42) and NAC treatment	Hunya A, FÃldi I, Szegedi V, SoÃ³s K, ZarÃ¡ndi M, SzabÃ³ A, ZÃ¡dori D, Penke B, Datki ZL.	Brain Res Bull.	2008 Mar 28	75(5):648-54.	Not PD specific
18359086	Cigarette smoke, nicotine and cotinine protect against 6-hydroxydopamine-induced toxicity in SH-SY5Y cells	Riveles K, Huang LZ, Quik M.	Neurotoxicology.	2008 May	29(3):421-7.	x
18371080	MPP+-induced neuronal death in rats involves tyrosine 33 phosphorylation of WW domain-containing oxidoreductase WOX1.	Lo CP1, Hsu LJ, Li MY, Hsu SY, Chuang JI, Tsai MS, Lin SR, Chang NS, Chen ST.	Eur J Neurosci.	2008 Apr	27(7):1634-46	Neuroblastoma, not SH-SY5Y
18373560	DJ-1-binding compounds prevent oxidative stress-induced cell death and movement defect in Parkinson's disease model rats	Miyazaki S, Yanagida T, Nunome K, Ishikawa S, Inden M, Kitamura Y, Nakagawa S, Taira T, Hirota K, Niwa M, Iguchi-Ariga SM, Ariga H.	J Neurochem.	2008 Jun 1	105(6):2418-34.	x
18375019	Interferon-gamma-dependent cytotoxic activation of human astrocytes and astrocytoma cells	Hashioka S, Klegeris A, Schwab C, McGeer PL.	Neurobiol Aging.	2009 Dec	30(12):1924-35.	Not PD specific
18377993	Oxidative insults induce DJ-1 upregulation and redistribution: implications for neuroprotection.	Lev N1, Ickowicz D, Melamed E, Offen D.	Neurotoxicology.	2008 May	29(3):397-405	x
18381761	High doses of nicotinamide prevent oxidative mitochondrial dysfunction in a cellular model and improve motor deficit in a Drosophila model of Parkinson's disease.	Jia H1, Li X, Gao H, Feng Z, Li X, Zhao L, Jia X, Zhang H, Liu J.	J Neurosci Res.	2008 Jul	86(9):2083-90	Neuroblastoma, not SH-SY5Y
18382667	DJ-1 modulates alpha-synuclein aggregation state in a cellular model of oxidative stress: relevance for Parkinson's disease and involvement of HSP70.	Batelli S1, Albani D, Rametta R, Polito L, Prato F, Pesaresi M, Negro A, Forloni G.	PLoS One.	2008 Apr 2	3(4):e1884	Neuroblastoma, not SH-SY5Y
18395193	Induction of BiP, an ER-resident protein, prevents the neuronal death induced by transient forebrain ischemia in gerbil	Oida Y, Izuta H, Oyagi A, Shimazawa M, Kudo T, Imaizumi K, Hara H.	Brain Res.	2008 May 7	1208:217-24.	Not PD specific
18395527	6-Hydroxydopamine (6-OHDA) induces Drp1-dependent mitochondrial fragmentation in SH-SY5Y cells	Gomez-Lazaro M, Bonekamp NA, Galindo MF, JordÃ¡n J, Schrader M.	Free Radic Biol Med.	2008 Jun 1	44(11):1960-9.	x
18399961	Neuromelanin selectively induces apoptosis in dopaminergic SH-SY5Y cells by deglutathionylation in mitochondria: involvement of the protein and melanin component	Naoi M, Maruyama W, Yi H, Yamaoka Y, Shamoto-Nagai M, Akao Y, Gerlach M, Tanaka M, Riederer P.	J Neurochem.	2008 Jun 1	105(6):2489-500.	x
18403118	Cyclooxygenase-2 is involved in oxidative damage and alpha-synuclein accumulation in dopaminergic cells	Chae SW, Kang BY, Hwang O, Choi HJ.	Neurosci Lett.	2008 May 9	436(2):205-9.	x
18404453	MPP(+)-induced cytotoxicity in neuroblastoma cells: Antagonism and reversal by guanosine	Pettifer KM, Jiang S, Bau C, Ballerini P, D'Alimonte I, Werstiuk ES, Rathbone MP.	Purinergic Signal.	2007 Sep	3(4):399-409.	x
18406059	Melatonin inhibits amphetamine-induced increase in alpha-synuclein and decrease in phosphorylated tyrosine hydroxylase in SK-N-SH cells.	Klongpanichapak S1, Phansuwan-Pujito P, Ebadi M, Govitrapong P.	Neurosci Lett.	2008 May 16	436(3):309-13	Neuroblastoma, not SH-SY5Y
18410503	Alpha-synuclein aggregation and cell death triggered by energy deprivation and dopamine overload are counteracted by D2/D3 receptor activation	Bellucci A, Collo G, Sarnico I, Battistin L, Missale C, Spano P.	J Neurochem.	2008 Jul	106(2):560-77.	x
18411255	The S18Y polymorphic variant of UCH-L1 confers an antioxidant function to neuronal cells.	Kyratzi E1, Pavlaki M, Stefanis L.	Hum Mol Genet.	2008 Jul 15	17(14):2160-71	Not accessible
18452993	Protective effect of the green tea component, L-theanine on environmental toxins-induced neuronal cell death	Cho HS, Kim S, Lee SY, Park JA, Kim SJ, Chun HS.	Neurotoxicology.	2008 Jul	29(4):656-62.	x
18455803	Quantitative evaluation of chaperone activity and neuroprotection by different preparations of a cell-penetrating Hsp70.	Nagel F1, Dohm CP, Bähr M, Wouters FS, Dietz GP.	J Neurosci Methods.	2008 Jun 30	171(2):226-32	Not PD specific
18457816	Protective effects of SUN N8075, a novel agent with antioxidant properties, in in vitro and in vivo models of Parkinson's disease	Oyagi A, Oida Y, Hara H, Izuta H, Shimazawa M, Matsunaga N, Adachi T, Hara H.	Brain Res.	2008 Jun 12	1214:169-76.	x
18462830	Kynurenic acid attenuates MPP(+)-induced dopaminergic neuronal cell death via a Bax-mediated mitochondrial pathway	Lee DY, Lee KS, Lee HJ, Noh YH, Kim do H, Lee JY, Cho SH, Yoon OJ, Lee WB, Kim KY, Chung YH, Kim SS.	Eur J Cell Biol.	2008 Jun	87(6):389-97.	x
18463503	Nurr1 transcriptionally regulates the expression of alpha-synuclein.	Yang YX1, Latchman DS.	Neuroreport.	2008 May 28	19(8):867-71	x
18484086	PPP2R2B CAG repeat length in the Han Chinese in Taiwan: Association analyses in neurological and psychiatric disorders and potential functional implications.	Chen CM1, Hou YT, Liu JY, Wu YR, Lin CH, Fung HC, Hsu WC, Hsu Y, Lee SH, Hsieh-Li HM, Su MT, Chen ST, Lane HY, Lee-Chen GJ.	Am J Med Genet B Neuropsychiatr Genet.	2009 Jan 5	150B(1):124-9	Not PD specific
18500384	Iron contributes to the formation of catechol isoquinolines and oxidative toxicity induced by overdose dopamine in dopaminergic SH-SY5Y cells	Wang R, Qing H, Liu XQ, Zheng XL, Deng YL.	Neurosci Bull.	2008 Jun	24(3):125-32.	x
18512151	Cytoprotective effect of Valeriana officinalis extract on an in vitro experimental model of Parkinson disease	de Oliveria DM, Barreto G, De Andrade DV, Saraceno E, Aon-Bertolino L, Capani F, Dos Santos El BachÃ¡ R, Giraldez LD.	Neurochem Res.	2009 Feb	34(2):215-20.	x
18533268	Disruption of dopamine transport by DDT and its metabolites.	Hatcher JM1, Delea KC, Richardson JR, Pennell KD, Miller GW.	Neurotoxicology.	2008 Jul	29(4):682-90	Neuroblastoma, not SH-SY5Y
18535749	Expression of Cbl-interacting protein of 85 kDa in MPTP mouse model of Parkinson's disease and 1-methyl-4-phenyl-pyridinium ion-treated dopaminergic SH-SY5Y cells	Bian M, Yu M, Yang S, Gao H, Huang Y, Deng C, Gao Y, Sun F, Huang F.	Acta Biochim Biophys Sin (Shanghai).	2008 Jun	40(6):505-12.	x
18538940	Modulation of SIRT1 expression in different neurodegenerative models and human pathologies.	Pallàs M1, Pizarro JG, Gutierrez-Cuesta J, Crespo-Biel N, Alvira D, Tajes M, Yeste-Velasco M, Folch J, Canudas AM, Sureda FX, Ferrer I, Camins A.	Neuroscience.	2008 Jul 17	154(4):1388-97	Neuroblastoma, not SH-SY5Y
18541373	Parkin is ubiquitinated by Nrdp1 and abrogates Nrdp1-induced oxidative stress	Yu F, Zhou J.	Neurosci Lett.	2008 Jul 25	440(1):4-8.	x
18553063	Isolation and functional characterization of single domain antibody modulators of Caspase-3 and apoptosis.	McGonigal K1, Tanha J, Palazov E, Li S, Gueorguieva-Owens D, Pandey S.	Appl Biochem Biotechnol.	2009 May	157(2):226-36	Not PD specific
18554677	Metallothionein-III protects against 6-hydroxydopamine-induced oxidative stress by increasing expression of heme oxygenase-1 in a PI3K and ERK/Nrf2-dependent manner	Hwang YP, Kim HG, Han EH, Jeong HG.	Toxicol Appl Pharmacol.	2008 Sep 15	231(3):318-27.	x
18555604	Pramipexole has astrocyte-mediated neuroprotective effects against lactacystin toxicity	Imamura K, Takeshima T, Nakaso K, Ito S, Nakashima K.	Neurosci Lett.	2008 Aug 1	440(2):97-102.	x
18560520	Knockdown of cytosolic glutaredoxin 1 leads to loss of mitochondrial membrane potential: implication in neurodegenerative diseases	Saeed U, Durgadoss L, Valli RK, Joshi DC, Joshi PG, Ravindranath V.	PLoS One.	2008 Jun 18	3(6):e2459.	Not PD specific
18560593	PINK1 is necessary for long term survival and mitochondrial function in human dopaminergic neurons.	Wood-Kaczmar A1, Gandhi S, Yao Z, Abramov AY, Miljan EA, Keen G, Stanyer L, Hargreaves I, Klupsch K, Deas E, Downward J, Mansfield L, Jat P, Taylor J, Heales S, Duchen MR, Latchman D, Tabrizi SJ, Wood NW.	PLoS One.	2008 Jun 18	3(6):e2455	x
18561034	Parkin attenuates wild-type tau modification in the presence of beta-amyloid and alpha-synuclein.	Moussa CE1.	J Mol Neurosci.	2009 Jan	37(1):25-36	Neuroblastoma, not SH-SY5Y
18565546	Effect of dopaminergic neurotoxin MPTP/MPP+ on coenzyme Q content	Dhanasekaran M, Karuppagounder SS, Uthayathas S, Wold LE, Parameshwaran K, Jayachandra Babu R, Suppiramaniam V, Brown-Borg H.	Life Sci.	2008 Jul 18	83(3-4):92-5.	x
18566453	Wild type alpha-synuclein is degraded by chaperone-mediated autophagy and macroautophagy in neuronal cells	Vogiatzi T, Xilouri M, Vekrellis K, Stefanis L.	J Biol Chem.	2008 Aug 29	283(35):23542-56.	x
18572379	Neuroprotection by Spirulina platensis protean extract and phycocyanin against iron-induced toxicity in SH-SY5Y neuroblastoma cells	Bermejo-BescÃ³s P, PiÃ±ero-Estrada E, Villar del Fresno AM.	Toxicol In Vitro.	2008 Sep	22(6):1496-502.	Not PD specific
18579122	Nurr1 deficiency predisposes to lactacystin-induced dopaminergic neuron injury in vitro and in vivo	Pan T, Zhu W, Zhao H, Deng H, Xie W, Jankovic J, Le W.	Brain Res.	2008 Jul 30	1222:222-9.	x
18585082	Proteomics as a tool to investigate cell models for dopamine toxicity	Fasano M, Alberio T, Colapinto M, Mila S, Lopiano L.	Parkinsonism Relat Disord.	2008	14 Suppl 2:S135-8.	Review
18586549	Proteasomal inhibition reduces parkin mRNA in PC12 and SH-SY5Y cells	Koch A, Lehmann-Horn K, DÃ¤chsel JC, Gasser T, Kahle PJ, LÃ¼cking CB.	Parkinsonism Relat Disord.	2009 Mar	15(3):220-5.	x
18591768	Pyrroloquinoline quinone prevents oxidative stress-induced neuronal death probably through changes in oxidative status of DJ-1.	Nunome K1, Miyazaki S, Nakano M, Iguchi-Ariga S, Ariga H.	Biol Pharm Bull.	2008 Jul	31(7):1321-6	x
18593583	The coffee diterpene kahweol induces heme oxygenase-1 via the PI3K and p38/Nrf2 pathway to protect human dopaminergic neurons from 6-hydroxydopamine-derived oxidative stress	Hwang YP, Jeong HG.	FEBS Lett.	2008 Jul 23	582(17):2655-62.	x
18594198	Mitochondrially localized ERK2 regulates mitophagy and autophagic cell stress: implications for Parkinson's disease	Dagda RK, Zhu J, Kulich SM, Chu CT.	Autophagy.	2008 Aug	4(6):770-82.	x
18598687	The neuroprotective effect of ladostigil against hydrogen peroxide-mediated cytotoxicity	Weinreb O, Bar-Am O, Amit T, Drigues N, Sagi Y, Youdim MB.	Chem Biol Interact.	2008 Sep 25	175(1-3):318-26.	Not PD specific
18599602	Mitochondrial complex I inhibitor rotenone inhibits and redistributes vesicular monoamine transporter 2 via nitration in human dopaminergic SH-SY5Y cells	Watabe M, Nakaki T.	Mol Pharmacol.	2008 Oct	74(4):933-40.	x
18612814	The effects of piroxicam in the attenuation of MPP+/MPTP toxicity in vitro and in vivo.	Soliman Y1, Jackson T, Mazzio E, Soliman KF.	Neurochem Res.	2009 Feb	34(2):304-10	Neuroblastoma, not SH-SY5Y
18639562	Inhibition of glial inflammatory activation and neurotoxicity by tricyclic antidepressants.	Hwang J1, Zheng LT, Ock J, Lee MG, Kim SH, Lee HW, Lee WH, Park HC, Suk K.	Neuropharmacology.	2008 Oct	55(5):826-34	Not PD specific
18646205	Pitx3-transfected astrocytes secrete brain-derived neurotrophic factor and glial cell line-derived neurotrophic factor and protect dopamine neurons in mesencephalon cultures	Yang D, Peng C, Li X, Fan X, Li L, Ming M, Chen S, Le W.	J Neurosci Res.	2008 Nov 15	86(15):3393-400.	SH-SY5Y used in previous studies
18654880	Mechanism of metal-mediated DNA damage and apoptosis induced by 6-hydroxydopamine in neuroblastoma SH-SY5Y cells	Kobayashi H, Oikawa S, Umemura S, Hirosawa I, Kawanishi S.	Free Radic Res.	2008 Jul	42(7):651-60.	x
18671761	Parkin-mediated ubiquitination regulates phospholipase C-gamma1	Dehvari N, Sandebring A, Flores-Morales A, Mateos L, Chuan YC, Goldberg MS, Cookson MR, Cowburn RF, Cedazo-MÃ­nguez A.	J Cell Mol Med.	2009 Sep	13(9B):3061-8.	x
18675900	Dietary oxyresveratrol prevents parkinsonian mimetic 6-hydroxydopamine neurotoxicity	Chao J, Yu MS, Ho YS, Wang M, Chang RC.	Free Radic Biol Med.	2008 Oct 1	45(7):1019-26.	x
18675914	Wild-type LRRK2 but not its mutant attenuates stress-induced cell death via ERK pathway	Liou AK, Leak RK, Li L, Zigmond MJ.	Neurobiol Dis.	2008 Oct	32(1):116-24.	x
18709653	Polyhydroxylated fullerene derivative C(60)(OH)(24) prevents mitochondrial dysfunction and oxidative damage in an MPP(+) -induced cellular model of Parkinson's disease.	Cai X1, Jia H, Liu Z, Hou B, Luo C, Feng Z, Li W, Liu J.	J Neurosci Res.	2008 Dec	86(16):3622-34	Neuroblastoma, not SH-SY5Y
18711745	Mitochondrial localization of DJ-1 leads to enhanced neuroprotection.	Junn E1, Jang WH, Zhao X, Jeong BS, Mouradian MM.	J Neurosci Res.	2009 Jan	87(1):123-9	Neuroblastoma, not SH-SY5Y
18720420	Extracellular dopamine induces the oxidative toxicity of SH-SY5Y cells	Jiang Y, Pei L, Li S, Wang M, Liu F.	Synapse.	2008 Nov	62(11):797-803.	x
18751929	The novel cholinesterase-monoamine oxidase inhibitor and antioxidant, ladostigil, confers neuroprotection in neuroblastoma cells and aged rats	Bar-Am O, Weinreb O, Amit T, Youdim MB.	J Mol Neurosci.	2009 Feb	37(2):135-45.	Not PD specific
18756631	Time-dependent protective and harmful effects of quercetin on 6-OHDA-induced toxicity in neuronal SH-SY5Y cells	Ossola B, KÃ¤Ã¤rÃ¤inen TM, Raasmaja A, MÃ¤nnistÃ PT.	Toxicology.	2008 Aug 19	250(1):1-8.	x
18771755	Anti-inflammatory effects of m-chlorophenylpiperazine in brain glia cells.	Hwang J1, Zheng LT, Ock J, Lee MG, Suk K.	Int Immunopharmacol.	2008 Dec 10	8(12):1686-94	Not PD specific
18786164	The antipsychotic spiperone attenuates inflammatory response in cultured microglia via the reduction of proinflammatory cytokine expression and nitric oxide production.	Zheng LT1, Hwang J, Ock J, Lee MG, Lee WH, Suk K.	J Neurochem.	2008 Dec	107(5):1225-35	Not PD specific
18802751	Protective effects of asiatic acid on rotenone- or H2O2-induced injury in SH-SY5Y cells	Xiong Y, Ding H, Xu M, Gao J.	Neurochem Res.	2009 Apr	34(4):746-54.	x
18805449	1-Methyl-4-phenyl-pyridinium ion-induced oxidative stress, c-Jun phosphorylation and DNA fragmentation factor-45 cleavage in SK-N-SH cells are averted by selegiline.	Chetsawang B1, Kooncumchoo P, Govitrapong P, Ebadi M.	Neurochem Int.	2008 Dec	53(6-8):283-8	Neuroblastoma, not SH-SY5Y
18832435	Hydrogen sulfide inhibits rotenone-induced apoptosis via preservation of mitochondrial function	Hu LF, Lu M, Wu ZY, Wong PT, Bian JS.	Mol Pharmacol.	2009 Jan	75(1):27-34.	x
18836921	Identification of genes associated with paraquat-induced toxicity in SH-SY5Y cells by PCR array focused on apoptotic pathways	Moran JM, Gonzalez-Polo RA, Ortiz-Ortiz MA, Niso-Santano M, Soler G, Fuentes JM.	J Toxicol Environ Health A.	2008	71(22):1457-67.	Not accessible
18841091	Regulation of alpha-synuclein expression by liver X receptor ligands in vitro.	Cheng D1, Kim WS, Garner B.	Neuroreport.	2008 Nov 19	19(17):1685-9	Neuroblastoma, not SH-SY5Y
18852031	Zinc rescues dopaminergic SK-N-SH cell lines from methamphetamine-induced toxicity.	Ajjimaporn A1, Shavali S, Ebadi M, Govitrapong P.	Brain Res Bull.	2008 Dec 16	77(6):361-6	Not PD specific
18922792	Formation of dopamine adducts derived from brain polyunsaturated fatty acids: mechanism for Parkinson disease	Liu X, Yamada N, Maruyama W, Osawa T.	J Biol Chem.	2008 Dec 12	283(50):34887-95.	x
18929576	Anti-oligomeric Abeta single-chain variable domain antibody blocks Abeta-induced toxicity against human neuroblastoma cells.	Zameer A1, Kasturirangan S, Emadi S, Nimmagadda SV, Sierks MR.	J Mol Biol.	2008 Dec 26	384(4):917-28	Not PD specific
18957893	Aggregates assembled from overexpression of wild-type alpha-synuclein are not toxic to human neuronal cells.	Ko LW1, Ko HH, Lin WL, Kulathingal JG, Yen SH.	J Neuropathol Exp Neurol.	2008 Nov	67(11):1084-96	Neuroblastoma, not SH-SY5Y
19000740	Okadaic acid protects human neuroblastoma SH-SY5Y cells from 1-methyl-4-phenylpyridinium ion-induced apoptosis	Ahn KH, Kim YS, Kim SY, Huh Y, Park C, Jeong JW.	Neurosci Lett.	2009 Jan 9	449(2):93-7.	x
19012744	The mechanisms of oxidative DNA damage and apoptosis induced by norsalsolinol, an endogenous tetrahydroisoquinoline derivative associated with Parkinson's disease	Kobayashi H, Fukuhara K, Tada-Oikawa S, Yada Y, Hiraku Y, Murata M, Oikawa S.	J Neurochem.	2009 Jan	108(2):397-407.	x
19013215	Reactive oxygen species production and MAPK activation are implicated in tetrahydrobiopterin-induced SH-SY5Y cell death	Chongthammakun V, Sanvarinda Y, Chongthammakun S.	Neurosci Lett.	2009 Jan 16	449(3):178-82.	x
19014378	Protective effects of astaxanthin on 6-hydroxydopamine-induced apoptosis in human neuroblastoma SH-SY5Y cells	Ikeda Y, Tsuji S, Satoh A, Ishikura M, Shirasawa T, Shimizu T.	J Neurochem.	2008 Dec	107(6):1730-40.	x
19014385	Differential effects of 24-hydroxycholesterol and 27-hydroxycholesterol on tyrosine hydroxylase and alpha-synuclein in human neuroblastoma SH-SY5Y cells	Rantham Prabhakara JP, Feist G, Thomasson S, Thompson A, Schommer E, Ghribi O.	J Neurochem.	2008 Dec	107(6):1722-9.	x
19022306	Involvement of ubiquitin proteasome system in protective mechanisms of Puerarin to MPP(+)-elicited apoptosis	Cheng YF, Zhu GQ, Wang M, Cheng H, Zhou A, Wang N, Fang N, Wang XC, Xiao XQ, Chen ZW, Li QL.	Neurosci Res.	2009 Jan	63(1):52-8.	x
19023331	Aggresome-forming TTRAP mediates pro-apoptotic properties of Parkinson's disease-associated DJ-1 missense mutations.	Zucchelli S1, Vilotti S, Calligaris R, Lavina ZS, Biagioli M, Foti R, De Maso L, Pinto M, Gorza M, Speretta E, Casseler C, Tell G, Del Sal G, Gustincich S.	Cell Death Differ.	2009 Mar	16(3):428-38	x
19056420	Effects of all-trans-retinoic acid on human SH-SY5Y neuroblastoma as in vitro model in neurotoxicity research	Cheung YT, Lau WK, Yu MS, Lai CS, Yeung SC, So KF, Chang RC.	Neurotoxicology.	2009 Jan	30(1):127-35.	x
19073213	Upregulation of cellular glutathione by 3H-1,2-dithiole-3-thione as a possible treatment strategy for protecting against acrolein-induced neurocytotoxicity	Jia Z, Misra BR, Zhu H, Li Y, Misra HP.	Neurotoxicology.	2009 Jan	30(1):1-9.	x
19101702	Protection against paraquat and A53T alpha-synuclein toxicity by cabergoline is partially mediated by dopamine receptors.	Chau KY1, Korlipara LV, Cooper JM, Schapira AH.	J Neurol Sci.	2009 Mar 15	278(1-2):44-53	x
19114014	Chronic, low-dose rotenone reproduces Lewy neurites found in early stages of Parkinson's disease, reduces mitochondrial movement and slowly kills differentiated SH-SY5Y neural cells	Borland MK, Trimmer PA, Rubinstein JD, Keeney PM, Mohanakumar K, Liu L, Bennett JP Jr.	Mol Neurodegener.	2008 Dec 29	3:21.	x
19135032	Microarray expression analysis of human dopaminergic neuroblastoma cells after RNA interference of SNCA--a key player in the pathogenesis of Parkinson's disease	HÃ¤big K, Walter M, Stappert H, Riess O, Bonin M.	Brain Res.	2009 Feb 23	1256:19-33.	x
19141614	Detecting morphologically distinct oligomeric forms of alpha-synuclein	Emadi S, Kasturirangan S, Wang MS, Schulz P, Sierks MR.	J Biol Chem.	2009 Apr 24	284(17):11048-58.	x
19148691	Ochratoxin A induces apoptosis in neuronal cells	Zhang X, Boesch-Saadatmandi C, Lou Y, Wolffram S, Huebbe P, Rimbach G.	Genes Nutr.	2009 Mar	4(1):41-8.	Not PD specific
19166511	Mutant Pink1 induces mitochondrial dysfunction in a neuronal cell model of Parkinson's disease by disturbing calcium flux.	Marongiu R1, Spencer B, Crews L, Adame A, Patrick C, Trejo M, Dallapiccola B, Valente EM, Masliah E.	J Neurochem.	2009 Mar	108(6):1561-74	Neuroblastoma, not SH-SY5Y
19198139	[Cellular pathophysiology of Parkinson's disease]	Takeda A, Sugeno N, Hasegawa T, Kobayashi M, Kikuchi A.	Rinsho Shinkeigaku.	2008 Nov	48(11):984-5.	Japanese
19221405	(-)-Epigallocatechin-3-Gallate protects SH-SY5Y cells against 6-OHDA-induced cell death through STAT3 activation	Wang L, Xu S, Xu X, Chan P.	J Alzheimers Dis.	2009	17(2):295-304.	x
19229105	Parkin, PINK1, and DJ-1 form a ubiquitin E3 ligase complex promoting unfolded protein degradation.	Xiong H1, Wang D, Chen L, Choo YS, Ma H, Tang C, Xia K, Jiang W, Ronai Z, Zhuang X, Zhang Z.	J Clin Invest.	2009 Mar	119(3):650-60	x
19229559	SCA8 repeat expansion: large CTA/CTG repeat alleles in neurological disorders and functional implications.	Wu YR1, Chen IC, Soong BW, Kao SH, Lee GC, Huang SY, Fung HC, Lee-Chen GJ, Chen CM.	Hum Genet.	2009 May	125(4):437-44	Not PD specific
19243240	Protective effects of neurotrophic factor-secreting cells in a 6-OHDA rat model of Parkinson disease	Sadan O, Bahat-Stromza M, Barhum Y, Levy YS, Pisnevsky A, Peretz H, Ilan AB, Bulvik S, Shemesh N, Krepel D, Cohen Y, Melamed E, Offen D.	Stem Cells Dev.	2009 Oct	18(8):1179-90.	x
19270741	Silencing of PINK1 expression affects mitochondrial DNA and oxidative phosphorylation in dopaminergic cells	Gegg ME, Cooper JM, Schapira AH, Taanman JW.	PLoS One.	2009	4(3):e4756.	x
19276614	Protection against oxidative stress-induced neurodegeneration by a modulator for DJ-1, the wild-type of familial Parkinson's disease-linked PARK7	Yanagida T, Kitamura Y, Yamane K, Takahashi K, Takata K, Yanagisawa D, Yasui H, Taniguchi T, Taira T, Honda T, Ariga H.	J Pharmacol Sci.	2009 Mar	109(3):463-8.	Not PD specific
19279012	Loss of PINK1 function promotes mitophagy through effects on oxidative stress and mitochondrial fission	Dagda RK, Cherra SJ 3rd, Kulich SM, Tandon A, Park D, Chu CT.	J Biol Chem.	2009 May 15	284(20):13843-55.	x
19327378	Baicalein exerts neuroprotective effects in 6-hydroxydopamine-induced experimental parkinsonism in vivo and in vitro	Mu X, He G, Cheng Y, Li X, Xu B, Du G.	Pharmacol Biochem Behav.	2009 Jun	92(4):642-8.	x
19330446	A comparative evaluation of the response to peroxynitrite by a brain endothelial cell line and control of the effects by drug targeting.	Bolton C1, Wood EG, Scott GS, Flower RJ.	Cell Mol Neurobiol.	2009 Jul	29(5):707-17	Not PD specific
19332121	Proteomic identification of dopamine-conjugated proteins from isolated rat brain mitochondria and SH-SY5Y cells	Van Laar VS, Mishizen AJ, Cascio M, Hastings TG.	Neurobiol Dis.	2009 Jun	34(3):487-500.	x
19349362	Protective role of endogenous gangliosides for lysosomal pathology in a cellular model of synucleinopathies.	Wei J1, Fujita M, Nakai M, Waragai M, Sekigawa A, Sugama S, Takenouchi T, Masliah E, Hashimoto M.	Am J Pathol.	2009 May	174(5):1891-909	Neuroblastoma, not SH-SY5Y
19351880	Peroxidase mechanism of lipid-dependent cross-linking of synuclein with cytochrome C: protection against apoptosis versus delayed oxidative stress in Parkinson disease	Bayir H, Kapralov AA, Jiang J, Huang Z, Tyurina YY, Tyurin VA, Zhao Q, Belikova NA, Vlasova II, Maeda A, Zhu J, Na HM, Mastroberardino PG, Sparvero LJ, Amoscato AA, Chu CT, Greenamyre JT, Kagan VE.	J Biol Chem.	2009 Jun 5	284(23):15951-69.	x
19360901	Role of soluble CD14 in cerebrospinal fluid as a regulator of glial functions.	Yin GN1, Jeon H, Lee S, Lee HW, Cho JY, Suk K.	J Neurosci Res.	2009 Aug 15	87(11):2578-90	Not PD specific
19369384	Alpha-Synuclein contributes to GSK-3beta-catalyzed Tau phosphorylation in Parkinson's disease models	Duka T, Duka V, Joyce JN, Sidhu A.	FASEB J.	2009 Sep	23(9):2820-30.	x
19379715	Modulation effect of filamentous phage on alpha-synuclein aggregation	Dimant H, Sharon N, Solomon B.	Biochem Biophys Res Commun.	2009 Jun 12	383(4):491-6.	x
19386233	PF9601N [N-(2-propynyl)-2-(5-benzyloxy-indolyl) methylamine] confers MAO-B independent neuroprotection in ER stress-induced cell death	Sanz E, Quintana A, Hidalgo J, Marco JL, Unzeta M.	Mol Cell Neurosci.	2009 May	41(1):19-31.	x
19392651	Accelerated proteasomal activity induced by Pb2+, Ga3+, or Cu2+ exposure does not induce degradation of alpha-synuclein	Grunberg-Etkovitz N, Lev N, Ickowicz D, Avital A, Offen D, Malik Z.	J Environ Pathol Toxicol Oncol.	2009	28(1):5-24.	Not accessible
19425177	Silencing DJ-1 reveals its contribution in paraquat-induced autophagy	GonzÃ¡lez-Polo R, Niso-Santano M, MorÃ¡n JM, Ortiz-Ortiz MA, Bravo-San Pedro JM, Soler G, Fuentes JM.	J Neurochem.	2009 May	109(3):889-98.	x
19436756	Abberant alpha-synuclein confers toxicity to neurons in part through inhibition of chaperone-mediated autophagy	Xilouri M, Vogiatzi T, Vekrellis K, Park D, Stefanis L.	PLoS One.	2009	4(5):e5515.	x
19443200	Protective effects of pinostilbene, a resveratrol methylated derivative, against 6-hydroxydopamine-induced neurotoxicity in SH-SY5Y cells	Chao J, Li H, Cheng KW, Yu MS, Chang RC, Wang M.	J Nutr Biochem.	2010 Jun	21(6):482-9.	x
19457084	The Parkinson disease-associated A30P mutation stabilizes alpha-synuclein against proteasomal degradation triggered by heme oxygenase-1 over-expression in human neuroblastoma cells.	Song W1, Patel A, Qureshi HY, Han D, Schipper HM, Paudel HK.	J Neurochem.	2009 Jul	110(2):719-33	Neuroblastoma, not SH-SY5Y
19457104	On the mechanism of internalization of alpha-synuclein into microglia: roles of ganglioside GM1 and lipid raft	Park JY, Kim KS, Lee SB, Ryu JS, Chung KC, Choo YK, Jou I, Kim J, Park SM.	J Neurochem.	2009 Jul	110(1):400-11.	x
19458475	Gangliosides' protection against lysosomal pathology of synucleinopathies.	Wei J1, Fujita M, Sekigawa A, Sekiyama K, Waragai M, Hashimoto M.	Autophagy.	2009 Aug	5(6):860-1	Neuroblastoma, not SH-SY5Y
19460457	Alpha-synuclein overexpression and aggregation exacerbates impairment of mitochondrial functions by augmenting oxidative stress in human neuroblastoma cells.	Parihar MS1, Parihar A, Fujita M, Hashimoto M, Ghafourifar P.	Int J Biochem Cell Biol.	2009 Oct	41(10):2015-24	x
19476547	Inducible over-expression of wild type alpha-synuclein in human neuronal cells leads to caspase-dependent non-apoptotic death.	Vekrellis K1, Xilouri M, Emmanouilidou E, Stefanis L.	J Neurochem.	2009 Jun	109(5):1348-62	x
19483198	Parkin promotes intracellular Abeta1-42 clearance.	Burns MP1, Zhang L, Rebeck GW, Querfurth HW, Moussa CE.	Hum Mol Genet.	2009 Sep 1	18(17):3206-16	Neuroblastoma, not SH-SY5Y
19484125	Neuroprotective effects of the triterpenoid, CDDO methyl amide, a potent inducer of Nrf2-mediated transcription	Yang L, Calingasan NY, Thomas B, Chaturvedi RK, Kiaei M, Wille EJ, Liby KT, Williams C, Royce D, Risingsong R, Musiek ES, Morrow JD, Sporn M, Beal MF.	PLoS One.	2009 Jun 1	4(6):e5757.	Not PD specific
19486265	Novel imine antioxidants at low nanomolar concentrations protect dopaminergic cells from oxidative neurotoxicity.	Hajieva P1, Mocko JB, Moosmann B, Behl C.	J Neurochem.	2009 Jul	110(1):118-32	x
19493164	Relationship between alpha synuclein phosphorylation, proteasomal inhibition and cell death: relevance to Parkinson's disease pathogenesis	Chau KY, Ching HL, Schapira AH, Cooper JM.	J Neurochem.	2009 Aug	110(3):1005-13.	x
19526284	Additive protective effects of donepezil and nicotine against salsolinol-induced cytotoxicity in SH-SY5Y cells	Das JR, Tizabi Y.	Neurotox Res.	2009 Oct	16(3):194-204.	x
19539006	Tranexamic acid protects against rotenone-induced apoptosis in human neuroblastoma SH-SY5Y cells	Kim HJ, Park HJ, Park HK, Chung JH.	Toxicology.	2009 Aug 3	262(2):171-4.	x
19540308	A single nucleotide polymorphism in the 3'UTR of the SNCA gene encoding alpha-synuclein is a new potential susceptibility locus for Parkinson disease.	Sotiriou S1, Gibney G, Baxevanis AD, Nussbaum RL.	Neurosci Lett.	2009 Sep 18	461(2):196-201	Use of the cell line to see the expression of a gene
19544392	Hydrogen sulfide-releasing NSAIDs attenuate neuroinflammation induced by microglial and astrocytic activation	Lee M, Sparatore A, Del Soldato P, McGeer E, McGeer PL.	Glia.	2010 Apr	58(1):103-13.	Not PD specific
19558452	The SIRT1 activator resveratrol protects SK-N-BE cells from oxidative stress and against toxicity caused by alpha-synuclein or amyloid-beta (1-42) peptide.	Albani D1, Polito L, Batelli S, De Mauro S, Fracasso C, Martelli G, Colombo L, Manzoni C, Salmona M, Caccia S, Negro A, Forloni G.	J Neurochem.	2009 Sep	110(5):1445-56	Not PD specific
19558709	Retinal pigment epithelial cells secrete neurotrophic factors and synthesize dopamine: possible contribution to therapeutic effects of RPE cell transplantation in Parkinson's disease.	Ming M1, Li X, Fan X, Yang D, Li L, Chen S, Gu Q, Le W.	J Transl Med.	2009 Jun 28	0.328472	x
19576930	Alpha-synuclein-glucocerebrosidase interactions in pharmacological Gaucher models: a biological link between Gaucher disease and parkinsonism.	Manning-Boğ AB1, Schüle B, Langston JW.	Neurotoxicology.	2009 Nov	30(6):1127-32	x
19578428	Drug discovery using chemical systems biology: repositioning the safe medicine Comtan to treat multi-drug and extensively drug resistant tuberculosis.	Kinnings SL1, Liu N, Buchmeier N, Tonge PJ, Xie L, Bourne PE.	PLoS Comput Biol.	2009 Jul	5(7):e1000423	Not PD specific
19609719	Dominant-positive HSF1 decreases alpha-synuclein level and alpha-synuclein-induced toxicity	Liangliang X, Yonghui H, Shunmei E, Shoufang G, Wei Z, Jiangying Z.	Mol Biol Rep.	2010 Apr	37(4):1875-81.	x
19610108	Parkin reverses intracellular beta-amyloid accumulation and its negative effects on proteasome function	Rosen KM, Moussa CE, Lee HK, Kumar P, Kitada T, Qin G, Fu Q, Querfurth HW.	J Neurosci Res.	2010 Jan	88(1):167-78.	Not PD specific
19617636	Parkin protects mitochondrial genome integrity and supports mitochondrial DNA repair	Rothfuss O, Fischer H, Hasegawa T, Maisel M, Leitner P, Miesel F, Sharma M, Bornemann A, Berg D, Gasser T, Patenge N.	Hum Mol Genet.	2009 Oct 15	18(20):3832-50.	x
19625296	Mutations in the LRRK2 Roc-COR tandem domain link Parkinson's disease to Wnt signalling pathways	Sancho RM, Law BM, Harvey K.	Hum Mol Genet.	2009 Oct 15	18(20):3955-68.	x
19626386	Neuroprotective effect of PACAP on translational control alteration and cognitive decline in MPTP parkinsonian mice.	Deguil J1, Chavant F, Lafay-Chebassier C, Pérault-Pochat MC, Fauconneau B, Pain S.	Neurotox Res.	2010 Feb	17(2):142-55	Neuroblastoma used on other studies
19630439	A cellular model to monitor proteasome dysfunction by alpha-synuclein	Nonaka T, Hasegawa M.	Biochemistry.	2009 Aug 25	48(33):8014-22.	x
19631241	Alteration of NRSF expression exacerbating 1-methyl-4-phenyl-pyridinium ion-induced cell death of SH-SY5Y cells	Yu M, Cai L, Liang M, Huang Y, Gao H, Lu S, Fei J, Huang F.	Neurosci Res.	2009 Nov	65(3):236-44.	x
19631409	Astrocytes produce the antiinflammatory and neuroprotective agent hydrogen sulfide	Lee M, Schwab C, Yu S, McGeer E, McGeer PL.	Neurobiol Aging.	2009 Oct	30(10):1523-34.	Not PD specific
19645749	The ubiquitin ligase E6-AP promotes degradation of alpha-synuclein.	Mulherkar SA1, Sharma J, Jana NR.	J Neurochem.	2009 Sep	110(6):1955-64	Neuroblastoma, not SH-SY5Y
19646423	Alpha-synuclein knockdown attenuates MPP+ induced mitochondrial dysfunction of SH-SY5Y cells	Wu F, Poon WS, Lu G, Wang A, Meng H, Feng L, Li Z, Liu S.	Brain Res.	2009 Oct 6	1292:173-9.	x
19647776	Neuroprotective effect of the antiparkinsonian drug pramipexole against nigrostriatal dopaminergic degeneration in rotenone-treated mice	Inden M, Kitamura Y, Tamaki A, Yanagida T, Shibaike T, Yamamoto A, Takata K, Yasui H, Taira T, Ariga H, Taniguchi T.	Neurochem Int.	2009 Dec	55(8):760-7.	x
19649707	Genome-wide microarray analysis of the differential neuroprotective effects of antioxidants in neuroblastoma cells overexpressing the familial Parkinson's disease alpha-synuclein A53T mutation	Ma L, Cao TT, Kandpal G, Warren L, Fred Hess J, Seabrook GR, Ray WJ.	Neurochem Res.	2010 Jan	35(1):130-42.	x
19673610	Functional mechanism of neuroprotection by inhibitors of type B monoamine oxidase in Parkinson's disease	Naoi M, Maruyama W.	Expert Rev Neurother.	2009 Aug	9(8):1233-50.	Not accessible
19679562	Parkin selectively alters the intrinsic threshold for mitochondrial cytochrome c release.	Berger AK1, Cortese GP, Amodeo KD, Weihofen A, Letai A, LaVoie MJ.	Hum Mol Genet.	2009 Nov 15	18(22):4317-28	x
19682553	Rapamycin protects against rotenone-induced apoptosis through autophagy induction	Pan T, Rawal P, Wu Y, Xie W, Jankovic J, Le W.	Neuroscience.	2009 Dec 1	164(2):541-51.	x
19686384	Seeding induced by alpha-synuclein oligomers provides evidence for spreading of alpha-synuclein pathology.	Danzer KM1, Krebs SK, Wolff M, Birk G, Hengerer B.	J Neurochem.	2009 Oct	111(1):192-203	x
19701583	[Dual effects of different concentrations of alpha-synuclein on the neurotoxicity of 6-hydroxydopamine in SH-SY5Y cells]	Zhou M, Xu SL, Chen B.	Sheng Li Xue Bao.	2009 Aug 25	61(4):324-30.	Chinese
19711118	Neurotoxic conversion of beta-synuclein: a novel approach to generate a transgenic mouse model of synucleinopathies?	Fujita M1, Sekigawa A, Sekiyama K, Sugama S, Hashimoto M.	J Neurol.	2009 Aug	256 Suppl 3:286-92	Review
19723537	Protective effect of histamine H2 receptor antagonist ranitidine against rotenone-induced apoptosis	Park HJ, Kim HJ, Park HK, Chung JH.	Neurotoxicology.	2009 Nov	30(6):1114-9.	x
19735655	C-terminal mechano growth factor protects dopamine neurons: a novel peptide that induces heme oxygenase-1	Quesada A, Micevych P, Handforth A.	Exp Neurol.	2009 Dec	220(2):255-66.	x
19735704	Paraquat activates the IRE1/ASK1/JNK cascade associated with apoptosis in human neuroblastoma SH-SY5Y cells	Yang W, Tiffany-Castiglioni E, Koh HC, Son IH.	Toxicol Lett.	2009 Dec 15	191(2-3):203-10.	x
19737600	Glutathione redox status in mitochondria and cytoplasm differentially and sequentially activates apoptosis cascade in dopamine-melanin-treated SH-SY5Y cells	Naoi M, Yi H, Maruyama W, Inaba K, Shamoto-Nagai M, Akao Y, Gerlach M, Riederer P.	Neurosci Lett.	2009 Nov 13	465(2):118-22.	x
19763737	Mitochondrial uncoupling protein-2 (UCP2) mediates leptin protection against MPP+ toxicity in neuronal cells	Ho PW, Liu HF, Ho JW, Zhang WY, Chu AC, Kwok KH, Ge X, Chan KH, Ramsden DB, Ho SL.	Neurotox Res.	2010 May	17(4):332-43.	x
19770030	Chrysanthemum morifolium Ramat (CM) extract protects human neuroblastoma SH-SY5Y cells against MPP+-induced cytotoxicity	Kim IS, Koppula S, Park PJ, Kim EH, Kim CG, Choi WS, Lee KH, Choi DK.	J Ethnopharmacol.	2009 Dec 10	126(3):447-54.	x
19774105	Aberrant regulation of choline metabolism by mitochondrial electron transport system inhibition in neuroblastoma cells	Baykal AT, Jain MR, Li H.	Metabolomics.	2008 Dec 1	4(4):347-356.	Not PD specific
19774675	Overexpression of aldehyde dehydrogenase 1A1 reduces oxidation-induced toxicity in SH-SY5Y neuroblastoma cells	Zhang M, Shoeb M, Goswamy J, Liu P, Xiao TL, Hogan D, Campbell GA, Ansari NH.	J Neurosci Res.	2010 Feb 15	88(3):686-94.	Not PD specific
19778565	NF-kappaB mediates MPP+-induced apoptotic cell death in neuroblastoma cells SH-EP1 through JNK and c-Jun/AP-1.	Yang HJ1, Wang L, Xia YY, Chang PN, Feng ZW.	Neurochem Int.	2010 Jan	56(1):128-34	Neuroblastoma, not SH-SY5Y
19780897	Sulforaphane as an inducer of glutathione prevents oxidative stress-induced cell death in a dopaminergic-like neuroblastoma cell line	Tarozzi A, Morroni F, Merlicco A, Hrelia S, Angeloni C, Cantelli-Forti G, Hrelia P.	J Neurochem.	2009 Dec	111(5):1161-71.	x
19784598	Assessing the neuroprotective effect of antioxidative food factors by application of lipid-derived dopamine modification adducts	Liu X, Yamada N, Osawa T.	Methods Mol Biol.	2009	580:143-52.	Not accessible
19785649	Lactacystin requires reactive oxygen species and Bax redistribution to induce mitochondria-mediated cell death	Perez-Alvarez S, Solesio ME, Manzanares J, JordÃ¡n J, Galindo MF.	Br J Pharmacol.	2009 Oct	158(4):1121-30.	x
19806188	Investigating bacterial sources of toxicity as an environmental contributor to dopaminergic neurodegeneration	Caldwell KA, Tucci ML, Armagost J, Hodges TW, Chen J, Memon SB, Blalock JE, DeLeon SM, Findlay RH, Ruan Q, Webber PJ, Standaert DG, Olson JB, Caldwell GA.	PLoS One.	2009 Oct 6	4(10):e7227.	x
19825160	Identification of a novel functional deletion variant in the 5'-UTR of the DJ-1 gene.	Keyser RJ1, van der Merwe L, Venter M, Kinnear C, Warnich L, Carr J, Bardien S.	BMC Med Genet.	2009 Oct 13	10:105	Neuroblastoma, not SH-SY5Y
19835929	HDAC inhibitor trichostatin A-inhibited survival of dopaminergic neuronal cells	Wang Y, Wang X, Liu L, Wang X.	Neurosci Lett.	2009 Dec 31	467(3):212-6.	x
19850127	VPS41, a protein involved in lysosomal trafficking, is protective in Caenorhabditis elegans and mammalian cellular models of Parkinson's disease	Ruan Q, Harrington AJ, Caldwell KA, Caldwell GA, Standaert DG.	Neurobiol Dis.	2010 Feb	37(2):330-8.	x
19852948	G protein-coupled receptor kinase 5, overexpressed in the alpha-synuclein up-regulation model of Parkinson's disease, regulates bcl-2 expression.	Liu P1, Wang X, Gao N, Zhu H, Dai X, Xu Y, Ma C, Huang L, Liu Y, Qin C.	Brain Res.	2010 Jan 11	1307:134-41	x
19857556	Synphilin-1 exhibits trophic and protective effects against Rotenone toxicity.	Li X1, Liu Z, Tamashiro K, Shi B, Rudnicki DD, Ross CA, Moran TH, Smith WW.	Neuroscience.	2010 Jan 20	165(2):455-62	Neuroblastoma, not SH-SY5Y
19860837	alpha-Synuclein modulation of Ca2+ signaling in human neuroblastoma (SH-SY5Y) cells	Hettiarachchi NT, Parker A, Dallas ML, Pennington K, Hung CC, Pearson HA, Boyle JP, Robinson P, Peers C.	J Neurochem.	2009 Dec	111(5):1192-201.	x
19878659	Overexpression of F(0)F(1)-ATP synthase alpha suppresses mutant huntingtin aggregation and toxicity in vitro	Wang HQ, Xu YX, Zhao XY, Zhao H, Yan J, Sun XB, Guo JC, Zhu CQ.	Biochem Biophys Res Commun.	2009 Dec 25	390(4):1294-8.	Not PD specific
19883732	The neuroprotective role of tissue inhibitor of metalloproteinase-2 in MPP+- or 6-OHDA-treated SK-N-BE(2)C and SH-SY5Y human neuroblastoma cells	Kim SY, Woo MS, Park JS, Hyun JW, Kim YS, Kim HS.	Neurosci Lett.	2010 Jan 4	468(2):136-40.	x
19885011	Naringin Protects against Rotenone-induced Apoptosis in Human Neuroblastoma SH-SY5Y Cells	Kim HJ, Song JY, Park HJ, Park HK, Yun DH, Chung JH.	Korean J Physiol Pharmacol.	2009 Aug	13(4):281-5.	x
19900407	Dopamine facilitates alpha-synuclein oligomerization in human neuroblastoma SH-SY5Y cells	Yamakawa K, Izumi Y, Takeuchi H, Yamamoto N, Kume T, Akaike A, Takahashi R, Shimohama S, Sawada H.	Biochem Biophys Res Commun.	2010 Jan 1	391(1):129-34.	x
19903456	AMP-activated protein kinase is activated in Parkinson's disease models mediated by 1-methyl-4-phenyl-1,2,3,6-tetrahydropyridine	Choi JS, Park C, Jeong JW.	Biochem Biophys Res Commun.	2010 Jan 1	391(1):147-51.	x
19916522	Phenotyping of an in vitro model of ischemic penumbra by iTRAQ-based shotgun quantitative proteomics.	Datta A1, Park JE, Li X, Zhang H, Ho ZS, Heese K, Lim SK, Tam JP, Sze SK.	J Proteome Res.	2010 Jan	9(1):472-84	Not PD specific
19929256	Grape extract protects mitochondria from oxidative damage and improves locomotor dysfunction and extends lifespan in a Drosophila Parkinson's disease model.	Long J1, Gao H, Sun L, Liu J, Zhao-Wilson X.	Rejuvenation Res.	2009 Oct	12(5):321-31	Neuroblastoma, not SH-SY5Y
19932157	alpha-Synuclein overexpression during manganese-induced apoptosis in SH-SY5Y neuroblastoma cells	Li Y, Sun L, Cai T, Zhang Y, Lv S, Wang Y, Ye L.	Brain Res Bull.	2010 Mar 16	81(4-5):428-33.	x
19962414	Regulation of matrix metalloproteinase-9 gene expression in MPP+- or 6-OHDA-treated human neuroblastoma SK-N-BE(2)C cells.	Kim SY1, Woo MS, Park JS, Kim HS.	Neurochem Int.	2010 Feb	56(3):437-42	Neuroblastoma, not SH-SY5Y
20002525	DNA methylation regulates adenosine A(2A) receptor cell surface expression levels	Buira SP, Albasanz JL, Dentesano G, Moreno J, MartÃ­n M, Ferrer I, Barrachina M.	J Neurochem.	2010 Mar	112(5):1273-85.	Not PD specific
20026175	A pro-drug of the green tea polyphenol (-)-epigallocatechin-3-gallate (EGCG) prevents differentiated SH-SY5Y cells from toxicity induced by 6-hydroxydopamine	Chao J, Lau WK, Huie MJ, Ho YS, Yu MS, Lai CS, Wang M, Yuen WH, Lam WH, Chan TH, Chang RC.	Neurosci Lett.	2010 Jan 29	469(3):360-4.	x
20027219	Vitamin B12-impaired metabolism produces apoptosis and Parkinson phenotype in rats expressing the transcobalamin-oleosin chimera in substantia nigra.	Orozco-Barrios CE1, Battaglia-Hsu SF, Arango-Rodriguez ML, Ayala-Davila J, Chery C, Alberto JM, Schroeder H, Daval JL, Martinez-Fong D, Gueant JL.	PLoS One.	2009 Dec 21	4(12):e8268	Neuroblastoma, not SH-SY5Y
20040370	Protective effects of standardized Thuja orientalis leaves against 6-hydroxydopamine-induced neurotoxicity in SH-SY5Y cells	Ju MS, Lee P, Kim HG, Lee KY, Hur J, Cho SH, Sung SH, Oh MS.	Toxicol In Vitro.	2010 Apr	24(3):759-65.	x
20042120	Effects of chronic low dose rotenone treatment on human microglial cells	Shaikh SB, Nicholson LF.	Mol Neurodegener.	2009 Dec 31	4:55.	SH-SY5Y used in previous studies
20045449	Enhanced vulnerability of PARK6 patient skin fibroblasts to apoptosis induced by proteasomal stress.	Klinkenberg M1, Thurow N, Gispert S, Ricciardi F, Eich F, Prehn JH, Auburger G, Kögel D.	Neuroscience.	2010 Mar 17	166(2):422-34	Neuroblastoma, not SH-SY5Y
20067570	1-Benzyl-1,2,3,4-tetrahydroisoquinoline binds with tubulin beta, a substrate of parkin, and reduces its polyubiquitination	Kohta R, Kotake Y, Hosoya T, Hiramatsu T, Otsubo Y, Koyama H, Hirokane Y, Yokoyama Y, Ikeshoji H, Oofusa K, Suzuki M, Ohta S.	J Neurochem.	2010 Sep 1	114(5):1291-301.	x
20067585	The neuron-specific isoform of glycogen synthase kinase-3beta is required for axon growth	CastaÃ±o Z, Gordon-Weeks PR, Kypta RM.	J Neurochem.	2010 Apr	113(1):117-30.	Not PD specific
20072923	Assessing the neuroprotective effect of antioxidant food factors by application of lipid-derived dopamine modification adducts	Liu X, Yamada N, Osawa T.	Methods Mol Biol.	2010	594:263-73.	Not accessible
20080185	Effects of MPP+ on the molecular pathways involved in cell cycle control in B65 neuroblastoma cells.	Pizarro JG1, Junyent F, Verdaguer E, Jordan J, Beas-Zarate C, Pallàs M, Camins A, Folch J.	Pharmacol Res.	2010 May	61(5):391-9	Neuroblastoma, not SH-SY5Y
20084477	Heteromeric complexes of heat shock protein 70 (HSP70) family members, including Hsp70B', in differentiated human neuronal cells	Chow AM, Mok P, Xiao D, Khalouei S, Brown IR.	Cell Stress Chaperones.	2010 Sep	15(5):545-53.	Not PD specific
20087465	Oxidative neurodegeneration is prevented by UCP0045037, an allosteric modulator for the reduced form of DJ-1, a wild-type of familial Parkinson's disease-linked PARK7	Yamane K, Kitamura Y, Yanagida T, Takata K, Yanagisawa D, Taniguchi T, Taira T, Ariga H.	Int J Mol Sci.	2009 Nov 5	10(11):4789-804.	x
20089134	Parkin regulates metal transport via proteasomal degradation of the 1B isoforms of divalent metal transporter 1	Roth JA, Singleton S, Feng J, Garrick M, Paradkar PN.	J Neurochem.	2010 Apr	113(2):454-64.	x
20096090	Metallocorroles as cytoprotective agents against oxidative and nitrative stress in cellular models of neurodegeneration	Kupershmidt L, Okun Z, Amit T, Mandel S, Saltsman I, Mahammed A, Bar-Am O, Gross Z, Youdim MB.	J Neurochem.	2010 Apr	113(2):363-73.	x
20096738	Involvement of induction and mitochondrial targeting of orphan nuclear receptor Nur77 in 6-OHDA-induced SH-SY5Y cell death	No H, Bang Y, Lim J, Kim SS, Choi HS, Choi HJ.	Neurochem Int.	2010 Mar	56(4):620-6.	x
20117172	Autophagy protects the rotenone-induced cell death in alpha-synuclein overexpressing SH-SY5Y cells	Dadakhujaev S, Noh HS, Jung EJ, Cha JY, Baek SM, Ha JH, Kim DR.	Neurosci Lett.	2010 Mar 12	472(1):47-52.	x
20132838	Gateway-compatible lentiviral transfer vectors for ubiquitin promoter driven expression of fluorescent fusion proteins	Krupka N, Strappe P, GÃtz J, Ittner LM.	Plasmid.	2010 May	63(3):155-60.	Not PD specific
20140223	Ribosylation rapidly induces alpha-synuclein to form highly cytotoxic molten globules of advanced glycation end products	Chen L, Wei Y, Wang X, He R.	PLoS One.	2010 Feb 4	5(2):e9052.	x
20141169	Levodopa deactivates enzymes that regulate thiol-disulfide homeostasis and promotes neuronal cell death: implications for therapy of Parkinson's disease.	Sabens EA1, Distler AM, Mieyal JJ.	Biochemistry.	2010 Mar 30	49(12):2715-24	x
20158462	Human tooth germ stem cells preserve neuro-protective effects after long-term cryo-preservation	YalvaÃ§ ME, Ramazanoglu M, Tekguc M, Bayrak OF, Shafigullina AK, Salafutdinov II, Blatt NL, Kiyasov AP, Sahin F, PalotÃ¡s A, Rizvanov AA.	Curr Neurovasc Res.	2010 Feb	7(1):49-58.	Not PD specific
20164329	Inhibition of FK506 binding proteins reduces alpha-synuclein aggregation and Parkinson's disease-like pathology.	Gerard M1, Deleersnijder A, Daniëls V, Schreurs S, Munck S, Reumers V, Pottel H, Engelborghs Y, Van den Haute C, Taymans JM, Debyser Z, Baekelandt V.	J Neurosci.	2010 Feb 17	30(7):2454-63	x
20171192	Formation of parkin aggregates and enhanced PINK1 accumulation during the pathogenesis of Parkinson's disease	Um JW, Park HJ, Song J, Jeon I, Lee G, Lee PH, Chung KC.	Biochem Biophys Res Commun.	2010 Mar 19	393(4):824-8.	x
20187987	Mulberry fruit protects dopaminergic neurons in toxin-induced Parkinson's disease models	Kim HG, Ju MS, Shim JS, Kim MC, Lee SH, Huh Y, Kim SY, Oh MS.	Br J Nutr.	2010 Jul	104(1):8-16.	x
20202476	Activation of apoptosis signal-regulating kinase 1 is a key factor in paraquat-induced cell death: modulation by the Nrf2/Trx axis	Niso-Santano M, GonzÃ¡lez-Polo RA, Bravo-San Pedro JM, GÃ³mez-SÃ¡nchez R, Lastres-Becker I, Ortiz-Ortiz MA, Soler G, MorÃ¡n JM, Cuadrado A, Fuentes JM	Free Radic Biol Med.	2010 May 15		x
20206240	Lipid rafts: keys to neurodegeneration.	Schengrund CL1.	Brain Res Bull.	2010 Apr 29	82(1-2):7-17	Review
20213743	CDK5 phosphorylates eNOS at Ser-113 and regulates NO production	Lee CH, Wei YW, Huang YT, Lin YT, Lee YC, Lee KH, Lu PJ.	J Cell Biochem.	2010 May	110(1):112-7.	Not PD specific
20224286	Filamentous phages reduce alpha-synuclein oligomerization in the membrane fraction of SH-SY5Y cells	Dimant H, Solomon B.	Neurodegener Dis.	2010	7(1-3):203-5.	x
20230279	Curcumin prevents dopaminergic neuronal death through inhibition of the c-Jun N-terminal kinase pathway	Yu S, Zheng W, Xin N, Chi ZH, Wang NQ, Nie YX, Feng WY, Wang ZY.	Rejuvenation Res.	2010 Feb	13(1):55-64.	x
20307492	Ethyl pyruvate has a neuroprotective effect through activation of extracellular signal-regulated kinase in Parkinson's disease model	Choi JS, Lee MS, Jeong JW.	Biochem Biophys Res Commun.	2010 Apr 9	394(3):854-8.	x
20334438	Differential effects of wild-type and A53T mutant isoform of alpha-synuclein on the mitochondrial proteome of differentiated SH-SY5Y cells	Pennington K, Peng J, Hung CC, Banks RE, Robinson PA.	J Proteome Res.	2010 May 7	9(5):2390-401.	x
20334701	Alpha-synuclein overexpression increases dopamine toxicity in BE2-M17 cells.	Bisaglia M1, Greggio E, Maric D, Miller DW, Cookson MR, Bubacco L.	BMC Neurosci.	2010 Mar 25	11:41	Neuroblastoma, not SH-SY5Y
20345754	Non-classical exocytosis of alpha-synuclein is sensitive to folding states and promoted under stress conditions.	Jang A1, Lee HJ, Suk JE, Jung JW, Kim KP, Lee SJ.	J Neurochem.	2010 Jun	113(5):1263-74	x
20345925	Cytochrome P450 2D6 enzyme neuroprotects against 1-methyl-4-phenylpyridinium toxicity in SH-SY5Y neuronal cells	Mann A, Tyndale RF.	Eur J Neurosci.	2010 Apr	31(7):1185-93.	x
20361292	Development and validation of a screening assay for the evaluation of putative neuroprotective agents in the treatment of Parkinson's disease	Yong-Kee CJ, Salomonczyk D, Nash JE.	Neurotox Res.	2011 May	19(4):519-26.	x
20368333	Effects of hydrogen sulfide-releasing L-DOPA derivatives on glial activation: potential for treating Parkinson disease	Lee M, Tazzari V, Giustarini D, Rossi R, Sparatore A, Del Soldato P, McGeer E, McGeer PL.	J Biol Chem.	2010 Jun 4	285(23):17318-28.	x
20380819	Comparison between proliferative and neuron-like SH-SY5Y cells as an in vitro model for Parkinson disease studies	Lopes FM, SchrÃder R, da Frota ML Jr, Zanotto-Filho A, MÃ¼ller CB, Pires AS, Meurer RT, Colpo GD, Gelain DP, Kapczinski F, Moreira JC, Fernandes Mda C, Klamt F.	Brain Res.	2010 Jun 14	1337:85-94.	x
20382451	Luteolin from Purple Perilla mitigates ROS insult particularly in primary neurons.	Zhao G1, Yao-Yue C, Qin GW, Guo LH.	Neurobiol Aging.	2012 Jan	33(1):176-86	Not PD specific
20386702	Nitrated alpha-synuclein induces the loss of dopaminergic neurons in the substantia nigra of rats.	Yu Z1, Xu X, Xiang Z, Zhou J, Zhang Z, Hu C, He C.	PLoS One.	2010 Apr 8	5(4):e9956	x
20395301	Parkinson disease-associated DJ-1 is required for the expression of the glial cell line-derived neurotrophic factor receptor RET in human neuroblastoma cells.	Foti R1, Zucchelli S, Biagioli M, Roncaglia P, Vilotti S, Calligaris R, Krmac H, Girardini JE, Del Sal G, Gustincich S.	J Biol Chem.	2010 Jun 11	285(24):18565-74	x
20403401	Proteomic analysis of expression and protein interactions in a 6-hydroxydopamine-induced rat brain lesion model	Park B, Yang J, Yun N, Choe KM, Jin BK, Oh YJ.	Neurochem Int.	2010 Aug	57(1):16-32.	x
20414966	Combined R-alpha-lipoic acid and acetyl-L-carnitine exerts efficient preventative effects in a cellular model of Parkinson's disease.	Zhang H1, Jia H, Liu J, Ao N, Yan B, Shen W, Wang X, Li X, Luo C, Liu J.	J Cell Mol Med.	2010 Jan	14(1-2):215-25	Neuroblastoma, not SH-SY5Y
20452332	Meloxicam protects cell damage from 1-methyl-4-phenyl pyridinium toxicity via the phosphatidylinositol 3-kinase/Akt pathway in human dopaminergic neuroblastoma SH-SY5Y cells	Tasaki Y, Omura T, Yamada T, Ohkubo T, Suno M, Iida S, Sakaguchi T, Asari M, Shimizu K, Matsubara K.	Brain Res.	2010 Jul 16	1344:25-33.	x
20467118	The effect of acetylcholine administration to sh-sy5y cells in the presence of levodopa (L-dopa) using conventional and sustained drug delivery - biomed 2010	Mitchell Martin Phd T, Benghuzzi Ph D H, Tucci Ph D M.	Biomed Sci Instrum.	2010	46:428-33.	Not accessible
20470875	Protective effects of Gastrodia elata Blume on MPP+-induced cytotoxicity in human dopaminergic SH-SY5Y cells	An H, Kim IS, Koppula S, Kim BW, Park PJ, Lim BO, Choi WS, Lee KH, Choi DK.	J Ethnopharmacol.	2010 Jul 20	130(2):290-8.	x
20484626	Cell-produced alpha-synuclein is secreted in a calcium-dependent manner by exosomes and impacts neuronal survival	Emmanouilidou E, Melachroinou K, Roumeliotis T, Garbis SD, Ntzouni M, Margaritis LH, Stefanis L, Vekrellis K.	J Neurosci.	2010 May 19	30(20):6838-51.	x
20493236	Triptolide T10 enhances AAV-mediated gene transfer in mice striatum	Ren X, Zhang T, Hu J, Ding W, Wang X.	Neurosci Lett.	2010 Aug 2	479(3):187-91.	Not PD specific
20497720	SH-SY5Y human neuroblastoma cell line: in vitro cell model of dopaminergic neurons in Parkinson's disease	Xie HR, Hu LS, Li GY.	Chin Med J (Engl).	2010 Apr 20	123(8):1086-92.	Review
20502937	Activation of ataxia telangiectasia muted under experimental models and human Parkinson's disease.	Camins A1, Pizarro JG, Alvira D, Gutierrez-Cuesta J, de la Torre AV, Folch J, Sureda FX, Verdaguer E, Junyent F, Jordán J, Ferrer I, Pallàs M.	Cell Mol Life Sci.	2010 Nov	67(22):3865-82	Neuroblastoma, not SH-SY5Y
20534000	Low-dose bafilomycin attenuates neuronal cell death associated with autophagy-lysosome pathway dysfunction	Pivtoraiko VN, Harrington AJ, Mader BJ, Luker AM, Caldwell GA, Caldwell KA, Roth KA, Shacka JJ.	J Neurochem.	2010 Aug	114(4):1193-204.	x
20542083	(-)-Epigallocatechin-3-gallate (EGCG), a green tea polyphenol, reduces dichlorodiphenyl-trichloroethane (DDT)-induced cell death in dopaminergic SHSY-5Y cells.	Tai KK1, Truong DD.	Neurosci Lett.	2010 Oct 4	482(3):183-7	x
20546814	Neuroprotection of deferoxamine on rotenone-induced injury via accumulation of HIF-1 alpha and induction of autophagy in SH-SY5Y cells	Wu Y, Li X, Xie W, Jankovic J, Le W, Pan T.	Neurochem Int.	2010 Oct	57(3):198-205.	x
20563702	Neuroprotective effect of Rosmarinus officinalis extract on human dopaminergic cell line, SH-SY5Y	Park SE, Kim S, Sapkota K, Kim SJ.	Cell Mol Neurobiol.	2010 Jul	30(5):759-67.	x
20563739	Proteomics analysis of MPP+-induced apoptosis in SH-SY5Y cells	Xie H, Chang M, Hu X, Wang D, Tian M, Li G, Jiang H, Wang Y, Dong Z, Zhang Y, Hu L.	Neurol Sci.	2011 Apr	32(2):221-8.	x
20594614	Neuroprotection of kaempferol by autophagy in models of rotenone-mediated acute toxicity: possible implications for Parkinson's disease	Filomeni G, Graziani I, De Zio D, Dini L, Centonze D, Rotilio G, Ciriolo MR.	Neurobiol Aging.	2012 Apr	33(4):767-85.	x
20594618	Autoantibodies to the adenosine triphosphate synthase play a pathogenetic role in Alzheimer's disease	Vacirca D, Delunardo F, Matarrese P, Colasanti T, Margutti P, Siracusano A, Pontecorvo S, Capozzi A, Sorice M, Francia A, Malorni W, Ortona E.	Neurobiol Aging.	2012 Apr	33(4):753-66.	Not PD specific
20600601	Zonisamide reduces cell death in SH-SY5Y cells via an anti-apoptotic effect and by upregulating MnSOD	Kawajiri S, Machida Y, Saiki S, Sato S, Hattori N.	Neurosci Lett.	2010 Sep 6	481(2):88-91.	x
20622253	Specific Inhibition of NEIL-initiated repair of oxidized base damage in human genome by copper and iron: potential etiological linkage to neurodegenerative diseases	Hegde ML, Hegde PM, Holthauzen LM, Hazra TK, Rao KS, Mitra S.	J Biol Chem.	2010 Sep 10	285(37):28812-25.	Not PD specific
20633628	Neuroprotective effects of an herbal medicine, Yi-Gan San on MPP+/MPTP-induced cytotoxicity in vitro and in vivo	Doo AR, Kim SN, Park JY, Cho KH, Hong J, Eun-Kyung K, Moon SK, Jung WS, Lee H, Jung JH, Park HJ.	J Ethnopharmacol.	2010 Sep 15	131(2):433-42.	x
20664956	Am80 induces neuronal differentiation in a human neuroblastoma NH-12 cell line.	Shiohira H1, Kitaoka A, Shirasawa H, Enjoji M, Nakashima M.	Int J Mol Med.	2010 Sep	26(3):393-9	Not PD specific
20686228	Salvianolic acid B protects SH-SY5Y neuroblastoma cells from 1-methyl-4-phenylpyridinium-induced apoptosis	Zeng G, Tang T, Wu HJ, You WH, Luo JK, Lin Y, Liang QH, Li XQ, Huang X, Yang QD.	Biol Pharm Bull.	2010	33(8):1337-42.	x
20690031	Alpha-synuclein aggregation is involved in the toxicity induced by ferric iron to SK-N-SH neuroblastoma cells.	He Q1, Song N, Xu H, Wang R, Xie J, Jiang H.	J Neural Transm (Vienna).	2011 Mar	118(3):397-406	Neuroblastoma, not SH-SY5Y
20701279	Redox reactions of the α-synuclein-Cu(2+) complex and their effects on neuronal cell viability.	Wang C1, Liu L, Zhang L, Peng Y, Zhou F.	Biochemistry.	2010 Sep 21	49(37):8134-42	x
20705047	Development of a high-throughput screening assay for cytoprotective agents in rotenone-induced cell death.	Yoon IS1, Au Q, Barber JR, Ng SC, Zhang B.	Anal Biochem.	2010 Dec 15	407(2):205-10	Neuroblastoma, not SH-SY5Y
20708055	Chrysotoxine, a novel bibenzyl compound, inhibits 6-hydroxydopamine induced apoptosis in SH-SY5Y cells via mitochondria protection and NF-ÎºB modulation	Song JX, Shaw PC, Sze CW, Tong Y, Yao XS, Ng TB, Zhang YB.	Neurochem Int.	2010 Nov	57(6):676-89.	x
20721355	Brain Activation by Peptide Pro-Leu-Gly-NH(2) (MIF-1)	Khan RS, Yu C, Kastin AJ, He Y, Ehrensing RH, Hsuchou H, Stone KP, Pan W.	Int J Pept.	2010	2010.	x
20727424	Recombinant human mitochondrial transcription factor A stimulates mitochondrial biogenesis and ATP synthesis, improves motor function after MPTP, reduces oxidative stress and increases survival after endotoxin	Thomas RR, Khan SM, Portell FR, Smigrodzki RM, Bennett JP Jr.	Mitochondrion.	2011 Jan	11(1):108-18.	x
20730377	DJ-1 as a modulator of autophagy: an hypothesis.	González-Polo RA1, Niso-Santano M, Gómez-Sánchez R, Bravo-San Pedro JM, Fuentes JM.	ScientificWorldJournal.	2010 Aug 17	10:1574-9	Review
20735429	Protective effect of hydrogen sulphide against 6-OHDA-induced cell injury in SH-SY5Y cells involves PKC/PI3K/Akt pathway	Tiong CX, Lu M, Bian JS.	Br J Pharmacol.	2010 Sep	161(2):467-80.	x
20821057	Protective effect of urocortin on 1-methyl-4-phenylpyridinium-induced dopaminergic neuronal death	Kim Y, Park MK, Chung S.	Mol Cells.	2010 Nov	30(5):427-33.	x
20836127	Changes in the two-dimensional electrophoresis pattern of the Parkinson's disease related protein DJ-1 in human SH-SY5Y neuroblastoma cells after dopamine treatment	Alberio T, Colapinto M, Natale M, Ravizza R, Gariboldi MB, Bucci EM, Lopiano L, Fasano M.	IUBMB Life.	2010 Sep	62(9):688-92.	x
20851755	Paraquat induces cyclooxygenase-2 (COX-2) implicated toxicity in human neuroblastoma SH-SY5Y cells	Yang W, Tiffany-Castiglioni E, Lee MY, Son IH.	Toxicol Lett.	2010 Dec 15	199(3):239-46.	x
20869113	Protective effects of TRH and its analogues against various cytotoxic agents in retinoic acid (RA)-differentiated human neuroblastoma SH-SY5Y cells	Jaworska-Feil L, Jantas D, Leskiewicz M, Budziszewska B, Kubera M, Basta-Kaim A, Lipkowski AW, Lason W.	Neuropeptides.	2010 Dec	44(6):495-508.	x
20871098	Mitofusin 1 and mitofusin 2 are ubiquitinated in a PINK1/parkin-dependent manner upon induction of mitophagy	Gegg ME, Cooper JM, Chau KY, Rojo M, Schapira AH, Taanman JW.	Hum Mol Genet.	2010 Dec 15	19(24):4861-70.	x
20875400	Cellular cholesterol enrichment prevents prion peptide-induced neuron cell damages	Jeong JK, Seol JW, Moon MH, Seo JS, Lee YJ, Kim JS, Park SY.	Biochem Biophys Res Commun.	2010 Oct 29	401(4):516-20.	Not PD specific
20929985	ASK1 overexpression accelerates paraquat-induced autophagy via endoplasmic reticulum stress	Niso-Santano M, Bravo-San Pedro JM, GÃ³mez-SÃ¡nchez R, Climent V, Soler G, Fuentes JM, GonzÃ¡lez-Polo RA.	Toxicol Sci.	2011 Jan	119(1):156-68.	x
20946892	A novel synthetic compound PHID (8-Phenyl-6a, 7, 8, 9, 9a, 10-hexahydro-6H-isoindolo [5, 6-g] quinoxaline-7, 9-dione) protects SH-SY5Y cells against MPP(+)-induced cytotoxicity through inhibition of reactive oxygen species generation and JNK signaling	Kim IS, Koppula S, Kim BW, Song MD, Jung JY, Lee G, Lee HS, Choi DK.	Eur J Pharmacol.	2011 Jan 10	650(1):48-57.	x
20959456	Phosphorylated alpha-synuclein at Ser-129 is targeted to the proteasome pathway in a ubiquitin-independent manner	Machiya Y, Hara S, Arawaka S, Fukushima S, Sato H, Sakamoto M, Koyama S, Kato T.	J Biol Chem.	2010 Dec 24	285(52):40732-44.	x
20963499	Insulin-like growth factor 1 protects human neuroblastoma cells SH-EP1 against MPP+-induced apoptosis by AKT/GSK-3β/JNK signaling.	Wang L1, Yang HJ, Xia YY, Feng ZW.	Apoptosis.	2010 Dec	15(12):1470-9	Neuroblastoma, not SH-SY5Y
20974203	Endoplasmic reticulum stress inducers provide protection against 6-hydroxydopamine-induced cytotoxicity	Hara H, Kamiya T, Adachi T.	Neurochem Int.	2011 Jan	58(1):35-43.	x
20977677	Proteomic analysis of dopamine and α-synuclein interplay in a cellular model of Parkinson's disease pathogenesis	Alberio T, Bossi AM, Milli A, Parma E, Gariboldi MB, Tosi G, Lopiano L, Fasano M.	FEBS J.	2010 Dec	277(23):4909-19.	x
20981484	Site-activated chelators derived from anti-Parkinson drug rasagiline as a potential safer and more effective approach to the treatment of Alzheimer's disease	Zheng H, Fridkin M, Youdim MB.	Neurochem Res.	2010 Dec	35(12):2117-23.	Not PD specific
21040713	Mg2+ ions reduce microglial and THP-1 cell neurotoxicity by inhibiting Ca2+ entry through purinergic channels	Lee M, Jantaratnotai N, McGeer E, McLarnon JG, McGeer PL.	Brain Res.	2011 Jan 19	1369:21-35.	Not PD specific
21044082	Agmatine effects on mitochondrial membrane potential and NF-ÎºB activation protect against rotenone-induced cell damage in human neuronal-like SH-SY5Y cells	Condello S, CurrÃ² M, Ferlazzo N, Caccamo D, Satriano J, Ientile R.	J Neurochem.	2011 Jan	116(1):67-75.	x
21047172	Phosphorylation of p66shc mediates 6-hydroxydopamine cytotoxicity	Yamamori T, Mizobata A, Saito Y, Urano Y, Inanami O, Irani K, Noguchi N.	Free Radic Res.	2011 Mar	45(3):342-50.	x
21056612	Astaxanthin protects against MPTP/MPP+-induced mitochondrial dysfunction and ROS production in vivo and in vitro	Lee DH, Kim CS, Lee YJ.	Food Chem Toxicol.	2011 Jan	49(1):271-80.	x
21056633	Proteomic insights into the protective mechanisms of an in vitro oxidative stress model of early stage Parkinson's disease	Bauereis B, Haskins WE, Lebaron RG, Renthal R.	Neurosci Lett.	2011 Jan 13	488(1):11-6.	x
21061154	Detoxified extract of Rhus verniciflua stokes inhibits rotenone-induced apoptosis in human dopaminergic cells, SH-SY5Y	Sapkota K, Kim S, Park SE, Kim SJ.	Cell Mol Neurobiol.	2011 Mar	31(2):213-23.	x
21067438	Bifunctional phenolic-choline conjugates as anti-oxidants and acetylcholinesterase inhibitors.	Sebestík J1, Marques SM, Falé PL, Santos S, Arduíno DM, Cardoso SM, Oliveira CR, Serralheiro ML, Santos MA.	J Enzyme Inhib Med Chem.	2011 Aug	26(4):485-97	Not PD specific
21081703	Paullinia cupana Mart. var. Sorbilis protects human dopaminergic neuroblastoma SH-SY5Y cell line against rotenone-induced cytotoxicity	de Oliveira DM, Barreto G, Galeano P, Romero JI, Holubiec MI, Badorrey MS, Capani F, Alvarez LD.	Hum Exp Toxicol.	2011 Sep	30(9):1382-91.	x
21091473	A neuroprotective role for angiogenin in models of Parkinson's disease	Steidinger TU, Standaert DG, Yacoubian TA.	J Neurochem.	2011 Feb	116(3):334-41.	x
21093517	Neuroprotective effects of SCM198 on 6-hydroxydopamine-induced behavioral deficit in rats and cytotoxicity in neuronal SH-SY5Y cells	Shi XR, Hong ZY, Liu HR, Zhang YC, Zhu YZ.	Neurochem Int.	2011 Jul	58(8):851-60.	x
21119307	Reticulon 3 attenuates the clearance of cytosolic prion aggregates via inhibiting autophagy.	Chen R1, Jin R, Wu L, Ye X, Yang Y, Luo K, Wang W, Wu D, Ye X, Huang L, Huang T, Xiao G.	Autophagy.	2011 Feb	7(2):205-16	Not PD specific
21120952	Mutant SOD1 and mitochondrial damage alter expression and splicing of genes controlling neuritogenesis in models of neurodegeneration	Lenzken SC, Romeo V, Zolezzi F, Cordero F, Lamorte G, Bonanno D, Biancolini D, Cozzolino M, Pesaresi MG, Maracchioni A, Sanges R, Achsel T, CarrÃ MT, Calogero RA, Barabino SM.	Hum Mutat.	2011 Feb	32(2):168-82.	Not PD specific
21127069	Parkinsonian neurotoxin 1-methyl-4-phenyl-1,2,3,6-tetrahydropyridine (MPTP) and alpha-synuclein mutations promote Tau protein phosphorylation at Ser262 and destabilize microtubule cytoskeleton in vitro.	Qureshi HY1, Paudel HK.	J Biol Chem.	2011 Feb 18	286(7):5055-68	Neuroblastoma, not SH-SY5Y
21130735	Nitrosative stress-induced Parkinsonian Lewy-like aggregates prevented through polyphenolic phytochemical analog intervention.	Pal R1, Miranda M, Narayan M.	Biochem Biophys Res Commun.	2011 Jan 7	404(1):324-9	Not PD specific
21130806	Iron overload triggers redox-sensitive signals in human IMR-32 neuroblastoma cells.	Salvador GA1, Oteiza PI.	Neurotoxicology.	2011 Jan	32(1):75-82	Not PD specific
21160133	DJ-1-Mediated protective effect of protocatechuic aldehyde against oxidative stress in SH-SY5Y cells	Gao JW, Yamane T, Maita H, Ishikawa S, Iguchi-Ariga SM, Pu XP, Ariga H.	J Pharmacol Sci.	2011	115(1):36-44.	x
21167259	Curcumin I protects the dopaminergic cell line SH-SY5Y from 6-hydroxydopamine-induced neurotoxicity through attenuation of p53-mediated apoptosis	Jaisin Y, Thampithak A, Meesarapee B, Ratanachamnong P, Suksamrarn A, Phivthong-Ngam L, Phumala-Morales N, Chongthammakun S, Govitrapong P, Sanvarinda Y.	Neurosci Lett.	2011 Feb 11	489(3):192-6.	x
21177249	A new cytosolic pathway from a Parkinson disease-associated kinase, BRPK/PINK1: activation of AKT via mTORC2	Murata H, Sakaguchi M, Jin Y, Sakaguchi Y, Futami J, Yamada H, Kataoka K, Huh NH.	J Biol Chem.	2011 Mar 4	286(9):7182-9.	x
21191760	Spirafolide from bay leaf (Laurus nobilis) prevents dopamine-induced apoptosis by decreasing reactive oxygen species production in human neuroblastoma SH-SY5Y cells	Ham A, Kim B, Koo U, Nam KW, Lee SJ, Kim KH, Shin J, Mar W.	Arch Pharm Res.	2010 Dec	33(12):1953-8.	Not PD specific
21219959	Protective effect of Chrysanthemum indicum Linne against 1-methyl-4-phenylpridinium ion and lipopolysaccharide-induced cytotoxicity in cellular model of Parkinson's disease	Kim IS, Ko HM, Koppula S, Kim BW, Choi DK.	Food Chem Toxicol.	2011 Apr	49(4):963-73.	x
21222532	Synergy between glutathione peroxidase-1 and astrocytic growth factors suppresses free radical generation and protects dopaminergic neurons against 6-hydroxydopamine.	Gardaneh M1, Gholami M, Maghsoudi N.	Rejuvenation Res.	2011 Apr	14(2):195-204	Neuroblastoma, not SH-SY5Y
21232572	The accumulation of neurotoxic proteins, induced by proteasome inhibition, is reverted by trehalose, an enhancer of autophagy, in human neuroblastoma cells.	Casarejos MJ1, Solano RM, Gómez A, Perucho J, de Yébenes JG, Mena MA.	Neurochem Int.	2011 Mar	58(4):512-20	Not PD specific
21235576	HDAC6 regulates aggresome-autophagy degradation pathway of α-synuclein in response to MPP+-induced stress	Su M, Shi JJ, Yang YP, Li J, Zhang YL, Chen J, Hu LF, Liu CF.	J Neurochem.	2011 Apr	117(1):112-20.	x
21245577	α-Synuclein propagates from mouse brain to grafted dopaminergic neurons and seeds aggregation in cultured human cells.	Hansen C1, Angot E, Bergström AL, Steiner JA, Pieri L, Paul G, Outeiro TF, Melki R, Kallunki P, Fog K, Li JY, Brundin P.	J Clin Invest.	2011 Feb	121(2):715-25	x
21255620	Alpha-synuclein release by neurons activates the inflammatory response in a microglial cell line	Alvarez-Erviti L, Couch Y, Richardson J, Cooper JM, Wood MJ.	Neurosci Res.	2011 Apr	69(4):337-42.	x
21271629	Baicalein inhibits formation of α-synuclein oligomers within living cells and prevents Aβ peptide fibrillation and oligomerisation	Lu JH, Ardah MT, Durairajan SS, Liu LF, Xie LX, Fong WF, Hasan MY, Huang JD, El-Agnaf OM, Li M.	Chembiochem.	2011 Mar 7	12(4):615-24.	x
21295016	FLZ, a novel HSP27 and HSP70 inducer, protects SH-SY5Y cells from apoptosis caused by MPP(+)	Kong XC, Zhang D, Qian C, Liu GT, Bao XQ.	Brain Res.	2011 Apr 6	1383:99-107.	x
21296869	Broad activation of the ubiquitin-proteasome system by Parkin is critical for mitophagy	Chan NC, Salazar AM, Pham AH, Sweredoski MJ, Kolawa NJ, Graham RL, Hess S, Chan DC.	Hum Mol Genet.	2011 May 1	20(9):1726-37.	x
21303699	Lysosomal dysfunction increases exosome-mediated alpha-synuclein release and transmission	Alvarez-Erviti L, Seow Y, Schapira AH, Gardiner C, Sargent IL, Wood MJ, Cooper JM.	Neurobiol Dis.	2011 Jun	42(3):360-7.	x
21322648	Alterations in the mitochondrial proteome of neuroblastoma cells in response to complex 1 inhibition.	Burté F1, De Girolamo LA, Hargreaves AJ, Billett EE.	J Proteome Res.	2011 Apr 1	10(4):1974-86	Neuroblastoma, not SH-SY5Y
21338582	A microRNA embedded AAV α-synuclein gene silencing vector for dopaminergic neurons	Han Y, Khodr CE, Sapru MK, Pedapati J, Bohn MC.	Brain Res.	2011 Apr 22	1386:15-24.	x
21349320	Protection against 1-methyl-4-phenylpyridinium ion (MPP+)-induced apoptosis by water extract of ginseng (Panax ginseng C.A. Meyer) in SH-SY5Y cells	Hu S, Han R, Mak S, Han Y.	J Ethnopharmacol.	2011 Apr 26	135(1):34-42.	x
21352099	The expression of nicotinamide N-methyltransferase increases ATP synthesis and protects SH-SY5Y neuroblastoma cells against the toxicity of Complex I inhibitors	Parsons RB, Aravindan S, Kadampeswaran A, Evans EA, Sandhu KK, Levy ER, Thomas MG, Austen BM, Ramsden DB.	Biochem J.	2011 May 15	436(1):145-55.	x
21366594	Impairment of oxidative stress-induced heme oxygenase-1 expression by the defect of Parkinson-related gene of PINK1	Chien WL, Lee TR, Hung SY, Kang KH, Lee MJ, Fu WM.	J Neurochem.	2011 May	117(4):643-53.	x
21382360	Cathepsin L is involved in 6-hydroxydopamine induced apoptosis of SH-SY5Y neuroblastoma cells	Xiang B, Fei X, Zhuang W, Fang Y, Qin Z, Liang Z.	Brain Res.	2011 Apr 28	1387:29-38.	x
21387370	Apomorphine treatment in Alzheimer mice promoting amyloid-β degradation	Himeno E, Ohyagi Y, Ma L, Nakamura N, Miyoshi K, Sakae N, Motomura K, Soejima N, Yamasaki R, Hashimoto T, Tabira T, LaFerla FM, Kira J.	Ann Neurol.	2011 Feb	69(2):248-56.	Not PD specific
21390306	Phosphodiesterase 7 inhibition preserves dopaminergic neurons in cellular and rodent models of Parkinson disease	Morales-Garcia JA, Redondo M, Alonso-Gil S, Gil C, Perez C, Martinez A, Santos A, Perez-Castillo A.	PLoS One.	2011 Feb 24	6(2):e17240.	x
21397036	Fumonisin B1 inhibits mitochondrial respiration and deregulates calcium homeostasis--implication to mechanism of cell toxicity	Domijan AM, Abramov AY.	Int J Biochem Cell Biol.	2011 Jun	43(6):897-904.	Not PD specific
21408142	Mutations in PINK1 and Parkin impair ubiquitination of Mitofusins in human fibroblasts	Rakovic A, GrÃ¼newald A, Kottwitz J, BrÃ¼ggemann N, Pramstaller PP, Lohmann K, Klein C.	PLoS One.	2011 Mar 8	6(3):e16746.	x
21440023	Blockade of enzyme activity inhibits tissue transglutaminase-mediated transamidation of α-synuclein in a cellular model of Parkinson's disease	Verhaar R, Jongenelen CA, Gerard M, Baekelandt V, Van Dam AM, Wilhelmus MM, Drukarch B.	Neurochem Int.	2011 Jun	58(7):785-93.	x
21454543	Rac1 protein rescues neurite retraction caused by G2019S leucine-rich repeat kinase 2 (LRRK2)	Chan D, Citro A, Cordy JM, Shen GC, Wolozin B.	J Biol Chem.	2011 May 6	286(18):16140-9.	x
21497157	Tetrahydroxystilbene glucoside protects human neuroblastoma SH-SY5Y cells against MPP+-induced cytotoxicity	Sun FL, Zhang L, Zhang RY, Li L.	Eur J Pharmacol.	2011 Jun 25	660(2-3):283-90.	x
21533646	Manganese induces oxidative stress, redox state unbalance and disrupts membrane bound ATPases on murine neuroblastoma cells in vitro: protective role of silymarin.	Chtourou Y1, Trabelsi K, Fetoui H, Mkannez G, Kallel H, Zeghal N.	Neurochem Res.	2011 Aug	36(8):1546-57	Not PD specific
21536104	Neuroprotective effects of tenuigenin in a SH-SY5Y cell model with 6-OHDA-induced injury	Liang Z, Shi F, Wang Y, Lu L, Zhang Z, Wang X, Wang X.	Neurosci Lett.	2011 Jun 22	497(2):104-9.	x
21545837	Insulin-like growth factor-I mediates neuroprotection in proteasome inhibition-induced cytotoxicity in SH-SY5Y cells	Cheng B, Maffi SK, Martinez AA, Acosta YP, Morales LD, Roberts JL.	Mol Cell Neurosci.	2011 Jul	47(3):181-90.	x
21547417	Idebenone induces apoptotic cell death in the human dopaminergic neuroblastoma SHSY-5Y cells.	Tai KK1, Pham L, Truong DD.	Neurotox Res.	2011 Nov	20(4):321-8	x
21558425	MicroRNA profiling of Parkinson's disease brains identifies early downregulation of miR-34b/c which modulate mitochondrial function	MiÃ±ones-Moyano E, Porta S, EscaramÃ­s G, Rabionet R, Iraola S, Kagerbauer B, Espinosa-Parrilla Y, Ferrer I, Estivill X, MartÃ­ E.	Hum Mol Genet.	2011 Aug 1	20(15):3067-78.	x
21592408	Neuroprotective effects of ginsenosides Rh1 and Rg2 on neuronal cells	Li XF, Lui CN, Jiang ZH, Ken YK.	Chin Med.	2011 May 19	6(1):19.	x
21595948	Oxidation of the cysteine-rich regions of parkin perturbs its E3 ligase activity and contributes to protein aggregation	Meng F, Yao D, Shi Y, Kabakoff J, Wu W, Reicher J, Ma Y, Moosmann B, Masliah E, Lipton SA, Gu Z.	Mol Neurodegener.	2011 May 19	6:34.	x
21615675	DLP1-dependent mitochondrial fragmentation mediates 1-methyl-4-phenylpyridinium toxicity in neurons: implications for Parkinson's disease	Wang X, Su B, Liu W, He X, Gao Y, Castellani RJ, Perry G, Smith MA, Zhu X.	Aging Cell.	2011 Oct	10(5):807-23.	x
21637291	Mitochondrially localized PKA reverses mitochondrial pathology and dysfunction in a cellular model of Parkinson's disease	Dagda RK, Gusdon AM, Pien I, Strack S, Green S, Li C, Van Houten B, Cherra SJ 3rd, Chu CT.	Cell Death Differ.	2011 Dec	18(12):1914-23.	x
21645326	DJ-1 can inhibit microtubule associated protein 1 B formed aggregates	Wang Z, Zhang Y, Zhang S, Guo Q, Tan Y, Wang X, Xiong R, Ding J, Chen S.	Mol Neurodegener.	2011 Jun 6	6:38.	x
21645620	DJ-1 associates with synaptic membranes.	Usami Y1, Hatano T, Imai S, Kubo S, Sato S, Saiki S, Fujioka Y, Ohba Y, Sato F, Funayama M, Eguchi H, Shiba K, Ariga H, Shen J, Hattori N.	Neurobiol Dis.	2011 Sep	43(3):651-62	x
21658409	Neuroprotection of α-synuclein under acute and chronic rotenone and maneb treatment is abolished by its familial Parkinson's disease mutations A30P, A53T and E46K	Choong CJ, Say YH.	Neurotoxicology.	2011 Dec	32(6):857-63.	x
21672570	Changes in iron-regulatory gene expression occur in human cell culture models of Parkinson's disease	Carroll CB, Zeissler ML, Chadborn N, Gibson K, Williams G, Zajicek JP, Morrison KE, Hanemann CO.	Neurochem Int.	2011 Aug	59(1):73-80.	x
21688047	Neuroprotective effects of 3α-acetoxyeudesma-1,4(15),11(13)-trien-12,6α-olide against dopamine-induced apoptosis in the human neuroblastoma SH-SY5Y cell line	Koo U, Nam KW, Ham A, Lyu D, Kim B, Lee SJ, Kim KH, Oh KB, Mar W, Shin J.	Neurochem Res.	2011 Nov	36(11):1991-2001.	x
21693152	Caveolin-1 interacts with alpha-synuclein and mediates toxic actions of cellular alpha-synuclein overexpression.	Madeira A1, Yang J, Zhang X, Vikeved E, Nilsson A, Andrén PE, Svenningsson P.	Neurochem Int.	2011 Aug	59(2):280-9	Neuroblastoma, not SH-SY5Y
21720016	α-Synuclein aggregation and transmission are enhanced by leucine-rich repeat kinase 2 in human neuroblastoma SH-SY5Y cells	Kondo K, Obitsu S, Teshima R.	Biol Pharm Bull.	2011	34(7):1078-83.	x
21735318	Dopamine and paraquat enhance α-synuclein-induced alterations in membrane conductance.	Feng LR1, Maguire-Zeiss KA.	Neurotox Res.	2011 Nov	20(4):387-401	Neuroblastoma, not SH-SY5Y
21737065	The effect of nNOS inhibitors on toxin-induced cell death in dopaminergic cell lines depends on the extent of enzyme expression	Brzozowski MJ, Alcantara SL, Iravani MM, Rose S, Jenner P.	Brain Res.	2011 Aug 2	1404:21-30.	x
21740546	Neuroprotective effect of a new DJ-1-binding compound against neurodegeneration in Parkinson's disease and stroke model rats	Kitamura Y, Watanabe S, Taguchi M, Takagi K, Kawata T, Takahashi-Niki K, Yasui H, Maita H, Iguchi-Ariga SM, Ariga H.	Mol Neurodegener.	2011 Jul 8	6(1):48.	x
21753002	Parkin interacts with Ambra1 to induce mitophagy	Van Humbeeck C, Cornelissen T, Hofkens H, Mandemakers W, Gevaert K, De Strooper B, Vandenberghe W.	J Neurosci.	2011 Jul 13	31(28):10249-61.	x
21769916	Sphingosine kinase 1/S1P pathway involvement in the GDNF-induced GAP43 transcription.	Murakami M1, Ito H, Hagiwara K, Kobayashi M, Hoshikawa A, Takagi A, Kojima T, Tamiya-Koizumi K, Sobue S, Ichihara M, Suzuki M, Banno Y, Nozawa Y, Murate T.	J Cell Biochem.	2011 Nov	112(11):3449-58	Not PD specific
21773851	Mitochondrial dysfunction precedes other sub-cellular abnormalities in an in vitro model linked with cell death in Parkinson's disease	Yong-Kee CJ, Sidorova E, Hanif A, Perera G, Nash JE.	Neurotox Res.	2012 Feb	21(2):185-94.	x
21777416	Upregulation of cathepsin D in the caudate nucleus of primates with experimental parkinsonism.	Yelamanchili SV1, Chaudhuri AD, Flynn CT, Fox HS.	Mol Neurodegener.	2011 Jul 21	6:52	Neuroblastoma, not SH-SY5Y
21778691	Resveratrol-activated AMPK/SIRT1/autophagy in cellular models of Parkinson's disease	Wu Y, Li X, Zhu JX, Xie W, Le W, Fan Z, Jankovic J, Pan T.	Neurosignals.	2011	19(3):163-74.	x
21785836	Quinoprotein adducts accumulate in the substantia nigra of aged rats and correlate with dopamine-induced toxicity in SH-SY5Y cells	Wang N, Wang Y, Yu G, Yuan C, Ma J.	Neurochem Res.	2011 Nov	36(11):2169-75.	x
21795716	Enhanced autophagy from chronic toxicity of iron and mutant A53T α-synuclein: implications for neuronal cell death in Parkinson disease	Chew KC, Ang ET, Tai YK, Tsang F, Lo SQ, Ong E, Ong WY, Shen HM, Lim KL, Dawson VL, Dawson TM, Soong TW.	J Biol Chem.	2011 Sep 23	286(38):33380-9.	x
21796424	Effects of obovatol on GSH depleted glia-mediated neurotoxicity and oxidative damage	Lee M, Kwon BM, Suk K, McGeer E, McGeer PL.	J Neuroimmune Pharmacol.	2012 Mar	7(1):173-86.	Not PD specific
21799249	Coenzyme Q10 decreases amyloid pathology and improves behavior in a transgenic mouse model of Alzheimer's disease.	Dumont M1, Kipiani K, Yu F, Wille E, Katz M, Calingasan NY, Gouras GK, Lin MT, Beal MF.	J Alzheimers Dis.	2011	27(1):211-23	Not PD specific
21805293	Protective effects of agmatine in rotenone-induced damage of human SH-SY5Y neuroblastoma cells: fourier transform infrared spectroscopy analysis in a model of Parkinson's disease	Condello S, CalabrÃ² E, Caccamo D, CurrÃ² M, Ferlazzo N, Satriano J, MagazÃ¹ S, Ientile R.	Amino Acids.	2012 Feb	42(2-3):775-81.	x
21815648	Levodopa activates apoptosis signaling kinase 1 (ASK1) and promotes apoptosis in a neuronal model: implications for the treatment of Parkinson's disease.	Liedhegner EA1, Steller KM, Mieyal JJ.	Chem Res Toxicol.	2011 Oct 17	24(10):1644-52	x
21816512	Neuroprotection by neuropeptide Y in cell and animal models of Parkinson's disease	Decressac M, Pain S, Chabeauti PY, Frangeul L, Thiriet N, Herzog H, Vergote J, Chalon S, Jaber M, Gaillard A.	Neurobiol Aging.	2012 Sep	33(9):2125-37.	x
21827489	Similar potency of catechin and its enantiomers in alleviating 1-methyl-4-phenylpyridinium ion cytotoxicity in SH-SY5Y cells	Ruan HL, Yang Y, Zhu XN, Wang XL, Chen RZ.	J Pharm Pharmacol.	2011 Sep	63(9):1169-74.	x
21848810	N-terminal deletion does not affect α-synuclein membrane binding, self-association and toxicity in human neuroblastoma cells, unlike yeast.	Vamvaca K1, Lansbury PT Jr, Stefanis L.	J Neurochem.	2011 Oct	119(2):389-97	x
21851386	Melatonin reduces the expression of alpha-synuclein in the dopamine containing neuronal regions of amphetamine-treated postnatal rats.	Sae-Ung K1, Uéda K, Govitrapong P, Phansuwan-Pujito P.	J Pineal Res.	2012 Jan	52(1):128-37	Neuroblastoma used on other studies
21856379	Overexpression of TFAM, NRF-1 and myr-AKT protects the MPP(+)-induced mitochondrial dysfunctions in neuronal cells	Piao Y, Kim HG, Oh MS, Pak YK.	Biochim Biophys Acta.	2012 May	1820(5):577-85.	x
21857923	Dysregulated LRRK2 signaling in response to endoplasmic reticulum stress leads to dopaminergic neuron degeneration in C. elegans.	Yuan Y1, Cao P, Smith MA, Kramp K, Huang Y, Hisamoto N, Matsumoto K, Hatzoglou M, Jin H, Feng Z.	PLoS One.	2011	6(8):e22354	x
21858606	Neurotrophic effects of growth/differentiation factor 5 in a neuronal cell line	Toulouse A, Collins GC, Sullivan AM.	Neurotox Res.	2012 Apr	21(3):256-65.	x
21886844	Improved immunodetection of endogenous α-synuclein	Lee BR, Kamitani T.	PLoS One.	2011	6(8):e23939.	Method description
21892618	HRD1 levels increased by zonisamide prevented cell death and caspase-3 activation caused by endoplasmic reticulum stress in SH-SY5Y cells	Omura T, Asari M, Yamamoto J, Kamiyama N, Oka K, Hoshina C, Maseda C, Awaya T, Tasaki Y, Shiono H, Shimizu K, Matsubara K.	J Mol Neurosci.	2012 Mar	46(3):527-35.	x
21899552	Leaf extract of Rhus verniciflua Stokes protects dopaminergic neuronal cells in a rotenone model of Parkinson's disease	Kim S, Park SE, Sapkota K, Kim MK, Kim SJ.	J Pharm Pharmacol.	2011 Oct	63(10):1358-67.	x
21907219	Neuroprotective effects of neurokinin receptor one in dopaminergic neurons are mediated through Akt/PKB cell signaling pathway	Chu JM, Chen LW, Chan YS, Yung KK.	Neuropharmacology.	2011 Dec	61(8):1389-98.	x
21913107	Assessment of proteasome impairment and accumulation/aggregation of ubiquitinated proteins in neuronal cultures.	Myeku N1, Metcalfe MJ, Huang Q, Figueiredo-Pereira M.	Methods Mol Biol.	2011	793:273-96	Not PD specific
21914725	The biogenesis and characterization of mammalian microRNAs of mirtron origin	Sibley CR, Seow Y, Saayman S, Dijkstra KK, El Andaloussi S, Weinberg MS, Wood MJ.	Nucleic Acids Res.	2012 Jan	40(1):438-48.	Not PD specific
21936000	Moracenin D from Mori Cortex radicis protects SH-SY5Y cells against dopamine-induced cell death by regulating nurr1 and α-synuclein expression	Ham A, Lee HJ, Hong SS, Lee D, Mar W.	Phytother Res.	2012 Apr	26(4):620-4.	x
21949858	Ceruloplasmin deficiency reduces levels of iron and BDNF in the cortex and striatum of young mice and increases their vulnerability to stroke.	Texel SJ1, Zhang J, Camandola S, Unger EL, Taub DD, Koehler RC, Harris ZL, Mattson MP.	PLoS One.	2011	6(9):e25077	Not PD specific
21950265	Rotenone-mediated changes in intracellular coenzyme A thioester levels: implications for mitochondrial dysfunction	Basu SS, Blair IA.	Chem Res Toxicol.	2011 Oct 17	24(10):1630-2.	x
21951066	The oxysterol 27-hydroxycholesterol regulates α-synuclein and tyrosine hydroxylase expression levels in human neuroblastoma cells through modulation of liver X receptors and estrogen receptors--relevance to Parkinson's disease	Marwarha G, Rhen T, Schommer T, Ghribi O.	J Neurochem.	2011 Dec	119(5):1119-36.	x
21958963	Interaction between NH(2)-tau fragment and Aβ in Alzheimer's disease mitochondria contributes to the synaptic deterioration.	Amadoro G1, Corsetti V, Atlante A, Florenzano F, Capsoni S, Bussani R, Mercanti D, Calissano P.	Neurobiol Aging.	2012 Apr	33(4):833.e1-25	Not PD specific
21969113	Optimized quantities of GDNF overexpressed by engineered astrocytes are critical for protection of neuroblastoma cells against 6-OHDA toxicity.	Safi R1, Gardaneh M, Panahi Y, Maghsoudi N, Zaefizadeh M, Gharib E.	J Mol Neurosci.	2012 Mar	46(3):654-65	Neuroblastoma, not SH-SY5Y
21986202	Neuroprotective and nootropic drug noopept rescues α-synuclein amyloid cytotoxicity	Jia X, Gharibyan AL, Ã-hman A, Liu Y, Olofsson A, Morozova-Roche LA.	J Mol Biol.	2011 Dec 16	414(5):699-712.	x
22001774	L-DOPA is incorporated into brain proteins of patients treated for Parkinson's disease, inducing toxicity in human neuroblastoma cells in vitro	Chan SW, Dunlop RA, Rowe A, Double KL, Rodgers KJ.	Exp Neurol.	2012 Nov	238(1):29-37.	x
22016521	Oligomeric-induced activity by thienyl pyrimidine compounds traps prion infectivity.	Ayrolles-Torro A1, Imberdis T, Torrent J, Toupet K, Baskakov IV, Poncet-Montange G, Grégoire C, Roquet-Baneres F, Lehmann S, Rognan D, Pugnière M, Verdier JM, Perrier V.	J Neurosci.	2011 Oct 19	31(42):14882-92	Not PD specific
22028146	Restriction of trophic factors and nutrients induces PARKIN expression	Klinkenberg M, Gispert S, Dominguez-Bautista JA, Braun I, Auburger G, Jendrach M.	Neurogenetics.	2012 Feb	13(1):9-21.	x
22040670	Regulatory effects of costunolide on dopamine metabolism-associated genes inhibit dopamine-induced apoptosis in human dopaminergic SH-SY5Y cells	Ham A, Lee SJ, Shin J, Kim KH, Mar W.	Neurosci Lett.	2012 Jan 24	507(2):101-5.	x
22041943	Protection against dopaminergic neurodegeneration in Parkinson's disease-model animals by a modulator of the oxidized form of DJ-1, a wild-type of familial Parkinson's disease-linked PARK7	Inden M, Kitamura Y, Takahashi K, Takata K, Ito N, Niwa R, Funayama R, Nishimura K, Taniguchi T, Honda T, Taira T, Ariga H.	J Pharmacol Sci.	2011	117(3):189-203.	x
22043816	Prevention of paraquat-induced apoptosis in human neuronal SH-SY5Y cells by lipocalin-type prostaglandin D synthase	Fujimori K, Fukuhara A, Inui T, Allhorn M.	J Neurochem.	2012 Jan	120(2):279-91.	x
22051113	Increase in endoplasmic reticulum-associated tissue transglutaminase and enzymatic activation in a cellular model of Parkinson's disease	Verhaar R, Drukarch B, Bol JG, Jongenelen CA, Musters RJ, Wilhelmus MM.	Neurobiol Dis.	2012 Mar	45(3):839-50.	x
22056603	Potential autophagy enhancers attenuate rotenone-induced toxicity in SH-SY5Y	Xiong N, Jia M, Chen C, Xiong J, Zhang Z, Huang J, Hou L, Yang H, Cao X, Liang Z, Sun S, Lin Z, Wang T.	Neuroscience.	2011 Dec 29	199:292-302.	x
22060133	α-Synuclein oligomers oppose long-term potentiation and impair memory through a calcineurin-dependent mechanism: relevance to human synucleopathic diseases.	Martin ZS1, Neugebauer V, Dineley KT, Kayed R, Zhang W, Reese LC, Taglialatela G.	J Neurochem.	2012 Feb	20(3):440-52	x
22078207	Bee venom protects SH-SY5Y human neuroblastoma cells from 1-methyl-4-phenylpyridinium-induced apoptotic cell death	Doo AR, Kim SN, Kim ST, Park JY, Chung SH, Choe BY, Chae Y, Lee H, Yin CS, Park HJ.	Brain Res.	2012 Jan 6	1429:106-15.	x
22113202	Isorhynchophylline, a natural alkaloid, promotes the degradation of alpha-synuclein in neuronal cells via inducing autophagy	Lu JH, Tan JQ, Durairajan SS, Liu LF, Zhang ZH, Ma L, Shen HM, Chan HY, Li M.	Autophagy.	2012 Jan	8(1):98-108.	x
22119889	Neuroprotection by marine-derived compound, 11-dehydrosinulariolide, in an in vitro Parkinson's model: a promising candidate for the treatment of Parkinson's disease	Chen WF, Chakraborty C, Sung CS, Feng CW, Jean YH, Lin YY, Hung HC, Huang TY, Huang SY, Su TM, Sung PJ, Sheu JH, Wen ZH.	Naunyn Schmiedebergs Arch Pharmacol.	2012 Mar	385(3):265-75.	x
22132160	Oxidation of DJ-1 induced by 6-hydroxydopamine decreasing intracellular glutathione	Miyama A, Saito Y, Yamanaka K, Hayashi K, Hamakubo T, Noguchi N.	PLoS One.	2011	6(11):e27883.	x
22142539	An expedient synthesis of honokiol and its analogues as potential neuropreventive agents.	Tripathi S1, Chan MH, Chen C.	Bioorg Med Chem Lett.	2012 Jan 1	22(1):216-21	x
22155091	Differentially expressed gene profile in the 6-hydroxy-dopamine-induced cell culture model of Parkinson's disease	Noelker C, Schwake M, Balzer-Geldsetzer M, Bacher M, Popp J, Schlegel J, Eggert K, Oertel WH, Klockgether T, Dodel RC.	Neurosci Lett.	2012 Jan 17	507(1):10-5.	x
22174920	Inhibition of the mitochondrial enzyme ABAD restores the amyloid-β-mediated deregulation of estradiol	Lim YA, Grimm A, Giese M, Mensah-Nyagan AG, Villafranca JE, Ittner LM, Eckert A, GÃtz J.	PLoS One.	2011	6(12):e28887.	Not PD specific
22177721	Centrosomal aggregates and Golgi fragmentation disrupt vesicular trafficking of DAT	Diaz-Corrales FJ, Miyazaki I, Asanuma M, Ruano D, Rios RM.	Neurobiol Aging.	2012 Oct	33(10):2462-77.	x
22178905	Ursodeoxycholic acid suppresses mitochondria-dependent programmed cell death induced by sodium nitroprusside in SH-SY5Y cells	Chun HS, Low WC.	Toxicology.	2012 Feb 26	292(2-3):105-12.	x
22182582	Oxicam structure in non-steroidal anti-inflammatory drugs is essential to exhibit Akt-mediated neuroprotection against 1-methyl-4-phenyl pyridinium-induced cytotoxicity	Tasaki Y, Yamamoto J, Omura T, Noda T, Kamiyama N, Yoshida K, Satomi M, Sakaguchi T, Asari M, Ohkubo T, Shimizu K, Matsubara K.	Eur J Pharmacol.	2012 Feb 15	676(1-3):57-63.	x
22198378	ATP13A2 regulates mitochondrial bioenergetics through macroautophagy	Gusdon AM, Zhu J, Van Houten B, Chu CT.	Neurobiol Dis.	2012 Mar	45(3):962-72.	x
22200858	Neuromelanin enhances the toxicity of α-synuclein in SK-N-SH cells.	Li J1, Yang J, Zhao P, Li S, Zhang R, Zhang X, Liu D, Zhang B.	J Neural Transm (Vienna).	2012 Jun	119(6):685-91	Neuroblastoma, not SH-SY5Y
22201916	Therapeutic effect of near infrared (NIR) light on Parkinson's disease models.	Quirk BJ1, Desmet KD, Henry M, Buchmann E, Wong-Riley M, Eells JT, Whelan HT.	Front Biosci (Elite Ed).	2012 Jan 1	4:818-23	Review
22228096	LRRK2 regulates mitochondrial dynamics and function through direct interaction with DLP1	Wang X, Yan MH, Fujioka H, Liu J, Wilson-Delfosse A, Chen SG, Perry G, Casadesus G, Zhu X.	Hum Mol Genet.	2012 May 1	21(9):1931-44.	x
22232559	Phosphorylation of α-synuclein protein at Ser-129 reduces neuronal dysfunction by lowering its membrane binding property in Caenorhabditis elegans	Kuwahara T, Tonegawa R, Ito G, Mitani S, Iwatsubo T.	J Biol Chem.	2012 Mar 2	287(10):7098-109.	x
22236282	Î"â¹-tetrahydrocannabinol (Î"â¹-THC) exerts a direct neuroprotective effect in a human cell culture model of Parkinson's disease	Carroll CB, Zeissler ML, Hanemann CO, Zajicek JP.	Neuropathol Appl Neurobiol.	2012 Oct	38(6):535-47.	x
22238721	Positive autoregulation of GDNF levels in the ventral tegmental area mediates long-lasting inhibition of excessive alcohol consumption.	Barak S1, Ahmadiantehrani S, Kharazia V, Ron D.	Transl Psychiatry.	2011	1	Not PD specific
22246992	HtrA2/Omi is involved in 6-OHDA-induced endoplasmic reticulum stress in SH-SY5Y cells	Luo F, Wei L, Sun C, Chen X, Wang T, Li Y, Liu Z, Chen Z, Xu P.	J Mol Neurosci.	2012 May	47(1):120-7.	x
22265823	Involvement of activation of PI3K/Akt pathway in the protective effects of puerarin against MPP+-induced human neuroblastoma SH-SY5Y cell death	Zhu G, Wang X, Wu S, Li Q.	Neurochem Int.	2012 Mar	60(4):400-8.	x
22265874	Dopamine release via the vacuolar ATPase V0 sector c-subunit, confirmed in N18 neuroblastoma cells, results in behavioral recovery in hemiparkinsonian mice.	Jin D1, Muramatsu S, Shimizu N, Yokoyama S, Hirai H, Yamada K, Liu HX, Higashida C, Hashii M, Higashida A, Asano M, Ohkuma S, Higashida H.	Neurochem Int.	2012 Nov	61(6):907-12	Neuroblastoma, not SH-SY5Y
22271254	Neddylation positively regulates the ubiquitin E3 ligase activity of parkin.	Um JW1, Han KA, Im E, Oh Y, Lee K, Chung KC.	J Neurosci Res.	2012 May	90(5):1030-42	x
22271527	Evaluation of the neurotoxic/neuroprotective role of organoselenides using differentiated human neuroblastoma SH-SY5Y cell line challenged with 6-hydroxydopamine	Lopes FM, Londero GF, de Medeiros LM, da Motta LL, Behr GA, de Oliveira VA, Ibrahim M, Moreira JC, PorciÃºncula LO, da Rocha JB, Klamt F.	Neurotox Res.	2012 Aug	22(2):138-49.	x
22278385	Astragaloside IV prevents MPPâº-induced SH-SY5Y cell death via the inhibition of Bax-mediated pathways and ROS production	Zhang ZG, Wu L, Wang JL, Yang JD, Zhang J, Zhang J, Li LH, Xia Y, Yao LB, Qin HZ, Gao GD.	Mol Cell Biochem.	2012 May	364(1-2):209-16.	x
22302610	The dopamine metabolite aminochrome inhibits mitochondrial complex I and modifies the expression of iron transporters DMT1 and FPN1	Aguirre P, Urrutia P, Tapia V, Villa M, Paris I, Segura-Aguilar J, NÃºÃ±ez MT.	Biometals.	2012 Aug	25(4):795-803.	x
22319455	The mitochondrial chaperone protein TRAP1 mitigates α-Synuclein toxicity	Butler EK, Voigt A, Lutz AK, Toegel JP, Gerhardt E, Karsten P, Falkenburger B, Reinartz A, Winklhofer KF, Schulz JB.	PLoS Genet.	2012 Feb	8(2):e1002488.	x
22364637	Effects of dexpramipexole on brain mitochondrial conductances and cellular bioenergetic efficiency.	Alavian KN1, Dworetzky SI, Bonanni L, Zhang P, Sacchetti S, Mariggio MA, Onofrj M, Thomas A, Li H, Mangold JE, Signore AP, Demarco U, Demady DR, Nabili P, Lazrove E, Smith PJ, Gribkoff VK, Jonas EA.	Brain Res.	2012 Mar 29	1446:1-11	Not PD specific
22384126	Exendin-4 ameliorates motor neuron degeneration in cellular and animal models of amyotrophic lateral sclerosis.	Li Y1, Chigurupati S, Holloway HW, Mughal M, Tweedie D, Bruestle DA, Mattson MP, Wang Y, Harvey BK, Ray B, Lahiri DK, Greig NH.	PLoS One.	2012	7(2):e32008	Not PD specific
22404304	Effect of quercetin and its glucuronide metabolite upon 6-hydroxydopamine-induced oxidative damage in Neuro-2a cells.	Mukai R1, Kawabata K, Otsuka S, Ishisaka A, Kawai Y, Ji ZS, Tsuboi H, Terao J.	Free Radic Res.	2012 Aug	46(8):1019-28	Neuroblastoma, not SH-SY5Y
22417924	Pharmacological manipulation of peroxisome proliferator-activated receptor Î³ (PPARÎ³) reveals a role for anti-oxidant protection in a model of Parkinson's disease	Martin HL, Mounsey RB, Mustafa S, Sathe K, Teismann P.	Exp Neurol.	2012 Jun	235(2):528-38.	x
22428580	Parkinson's disease-associated DJ-1 mutations impair mitochondrial dynamics and cause mitochondrial dysfunction.	Wang X1, Petrie TG, Liu Y, Liu J, Fujioka H, Zhu X.	J Neurochem.	2012 Jun	21(5):830-9	Neuroblastoma, not SH-SY5Y
22429328	PEP-1-heat shock protein 27 protects from neuronal damage in cells and in a Parkinson's disease mouse model	Lee YP, Kim DW, Kang HW, Hwang JH, Jeong HJ, Sohn EJ, Kim MJ, Ahn EH, Shin MJ, Kim DS, Kang TC, Kwon OS, Cho SW, Park J, Eum WS, Choi SY.	FEBS J.	2012 Jun	279(11):1929-42.	x
22431735	Dopamine-derived quinones affect the structure of the redox sensor DJ-1 through modifications at Cys-106 and Cys-53	Girotto S, Sturlese M, Bellanda M, Tessari I, Cappellini R, Bisaglia M, Bubacco L, Mammi S.	J Biol Chem.	2012 May 25	287(22):18738-49.	x
22445325	Extracellular signal-regulated kinase is involved in alpha-synuclein-induced mitochondrial dynamic disorders by regulating dynamin-like protein 1.	Gui YX1, Wang XY, Kang WY, Zhang YJ, Zhang Y, Zhou Y, Quinn TJ, Liu J, Chen SD.	Neurobiol Aging.	2012 Dec	33(12):2841-54	x
22446186	Neurotoxin-induced ER stress in mouse dopaminergic neurons involves downregulation of TRPC1 and inhibition of AKT/mTOR signaling.	Selvaraj S1, Sun Y, Watt JA, Wang S, Lei S, Birnbaumer L, Singh BB.	J Clin Invest.	2012 Apr	122(4):1354-67	x
22448094	Protective effect of theaflavins on neuron against 6-hydroxydopamine-induced apoptosis in SH-SY5Y cells	Luo Z, Zhao Y, Wang Y, Yang X, Zhao B.	J Clin Biochem Nutr.	2012 Mar	50(2):133-8.	x
22465686	Fluazinam targets mitochondrial complex I to induce reactive oxygen species-dependent cytotoxicity in SH-SY5Y cells	Lee JE, Kang JS, Ki YW, Park JH, Shin IC, Koh HC.	Neurochem Int.	2012 Jun	60(8):773-81.	x
22480690	Lithium and oxidative stress lessons from the MPTP model of Parkinson's disease	Arraf Z, Amit T, Youdim MB, Farah R.	Neurosci Lett.	2012 May 10	516(1):57-61.	x
22492997	DJ-1 induces thioredoxin 1 expression through the Nrf2 pathway	Im JY, Lee KW, Woo JM, Junn E, Mouradian MM.	Hum Mol Genet.	2012 Jul 1	21(13):3013-24.	x
22497022	Neurite transection produces cytosolic oxidation, which enhances plasmalemmal repair.	Spaeth CS1, Fan JD, Spaeth EB, Robison T, Wilcott RW, Bittner GD.	J Neurosci Res.	2012 May	90(5):945-54	Not PD specific
22507528	Neuronal RING finger protein 11 (RNF11) regulates canonical NF-κB signaling.	Pranski EL1, Dalal NV, Herskowitz JH, Orr AL, Roesch LA, Fritz JJ, Heilman C, Lah JJ, Levey AI, Betarbet RS.	J Neuroinflammation.	2012 Apr 16	9:67	Not PD specific
22516750	Salvianolic acid A protects human SH-SY5Y neuroblastoma cells against Hâ‚‚Oâ‚‚-induced injury by increasing stress tolerance ability	Zhang HA, Gao M, Zhang L, Zhao Y, Shi LL, Chen BN, Wang YH, Wang SB, Du GH.	Biochem Biophys Res Commun.	2012 May 11	421(3):479-83.	x
22523093	Human DJ-1 and its homologs are novel glyoxalases	Lee JY, Song J, Kwon K, Jang S, Kim C, Baek K, Kim J, Park C.	Hum Mol Genet.	2012 Jul 15	21(14):3215-25.	x
22525935	Low level of glutathione can intensify the toxic effect of salsolinol in SH-SY5Y neuroblastoma cell line	Wszelaki N, Melzig MF.	Neurotoxicology.	2012 Jun	33(3):424-8.	x
22526393	Transduced Tat-DJ-1 protein protects against oxidative stress-induced SH-SY5Y cell death and Parkinson disease in a mouse model	Jeong HJ, Kim DW, Woo SJ, Kim HR, Kim SM, Jo HS, Park M, Kim DS, Kwon OS, Hwang IK, Han KH, Park J, Eum WS, Choi SY.	Mol Cells.	2012 May	33(5):471-8.	x
22528248	Evidence for synergism between cell death mechanisms in a cellular model of neurodegeneration in Parkinson's disease	Yong-Kee CJ, Warre R, Monnier PP, Lozano AM, Nash JE.	Neurotox Res.	2012 Nov	22(4):355-64.	x
22528366	Leucine-rich repeat kinase 2 and alternative splicing in Parkinson's disease.	Elliott DA1, Kim WS, Gorissen S, Halliday GM, Kwok JB.	Mov Disord.	2012 Jul	27(8):1004-11	Neuroblastoma, not SH-SY5Y
22532838	Parkinson's disease DJ-1 L166P alters rRNA biogenesis by exclusion of TTRAP from the nucleolus and sequestration into cytoplasmic aggregates via TRAF6	Vilotti S, Codrich M, Dal Ferro M, Pinto M, Ferrer I, Collavin L, Gustincich S, Zucchelli S.	PLoS One.	2012	7(4):e35051.	x
22537068	Alpha-synuclein impairs normal dynamics of mitochondria in cell and animal models of Parkinson's disease	Xie W, Chung KK.	J Neurochem.	2012 Jul	122(2):404-14.	x
22554508	Stimulation of vesicular monoamine transporter 2 activity by DJ-1 in SH-SY5Y cells	Ishikawa S, Tanaka Y, Takahashi-Niki K, Niki T, Ariga H, Iguchi-Ariga SM.	Biochem Biophys Res Commun.	2012 May 18	421(4):813-8.	x
22555455	The caspase 6 derived N-terminal fragment of DJ-1 promotes apoptosis via increased ROS production	Robert G, Puissant A, Dufies M, Marchetti S, Jacquel A, Cluzeau T, Colosetti P, Belhacene N, Kahle P, Da Costa CA, Luciano F, Checler F, Auberger P.	Cell Death Differ.	2012 Nov	19(11):1769-78.	x
22555844	Hydrogen sulfide protects SH-SY5Y cells against 6-hydroxydopamine-induced endoplasmic reticulum stress	Xie L, Tiong CX, Bian JS.	Am J Physiol Cell Physiol.	2012 Jul 1	303(1):C81-91.	x
22558197	Tau-mediated nuclear depletion and cytoplasmic accumulation of SFPQ in Alzheimer's and Pick's disease	Ke YD, Dramiga J, SchÃ¼tz U, Kril JJ, Ittner LM, SchrÃder H, GÃtz J.	PLoS One.	2012	7(4):e35678.	Not PD specific
22568433	The human testis-determining factor SRY localizes in midbrain dopamine neurons and regulates multiple components of catecholamine synthesis and metabolism.	Czech DP1, Lee J, Sim H, Parish CL, Vilain E, Harley VR.	J Neurochem.	2012 Jul	122(2):260-71	Not PD specific
22577844	ATXN8 -62 G/A promoter polymorphism and risk of Taiwanese Parkinson's disease.	Chen IC1, Wu YR, Yang SJ, Kao SH, Chen YC, Chang KH, Lee CM, Lee-Chen GJ, Chen CM.	Eur J Neurol.	2012 Nov	19(11):1462-9	Neuroblastoma, not SH-SY5Y
22609282	DJ-1 deficiency perturbs microtubule dynamics and impairs striatal neurite outgrowth	Sheng C, Heng X, Zhang G, Xiong R, Li H, Zhang S, Chen S.	Neurobiol Aging.	2013 Feb	34(2):489-98.	x
22617635	Meloxicam ameliorates motor dysfunction and dopaminergic neurodegeneration by maintaining Akt-signaling in a mouse Parkinson's disease model	Tasaki Y, Yamamoto J, Omura T, Sakaguchi T, Kimura N, Ohtaki K, Ono T, Suno M, Asari M, Ohkubo T, Noda T, Awaya T, Shimizu K, Matsubara K.	Neurosci Lett.	2012 Jul 11	521(1):15-9.	SH-SY5Y used in previous studies
22652643	GST P1, a novel downstream regulator of LRRK2, G2019S-induced neuronal cell death	Chen J, Liou A, Zhang L, Weng Z, Gao Y, Cao G, Zigmond MJ, Chen J.	Front Biosci (Elite Ed).	2012 Jun 1	4:2365-77.	x
22655218	Magnolol Protects against MPTP/MPP(+)-Induced Toxicity via Inhibition of Oxidative Stress in In Vivo and In Vitro Models of Parkinson's Disease	Muroyama A, Fujita A, Lv C, Kobayashi S, Fukuyama Y, Mitsumoto Y.	Parkinsons Dis.	2012	2012:985157.	x
22736029	G2019S leucine-rich repeat kinase 2 causes uncoupling protein-mediated mitochondrial depolarization.	Papkovskaia TD1, Chau KY, Inesta-Vaquera F, Papkovsky DB, Healy DG, Nishio K, Staddon J, Duchen MR, Hardy J, Schapira AH, Cooper JM.	Hum Mol Genet.	2012 Oct 1	21(19):4201-13	x
22764226	Acute administration of L-DOPA induces changes in methylation metabolites, reduced protein phosphatase 2A methylation, and hyperphosphorylation of Tau protein in mouse brain	Bottiglieri T, Arning E, Wasek B, Nunbhakdi-Craig V, Sontag JM, Sontag E.	J Neurosci.	2012 Jul 4	32(27):9173-81.	x
22766071	NRSF/REST neuronal deficient mice are more vulnerable to the neurotoxin MPTP	Yu M, Suo H, Liu M, Cai L, Liu J, Huang Y, Xu J, Wang Y, Zhu C, Fei J, Huang F.	Neurobiol Aging.	2013 Mar	34(3):916-27.	SH-SY5Y used in previous studies
22771470	Biophysical properties and cellular toxicity of covalent crosslinked oligomers of α-synuclein formed by photoinduced side-chain tyrosyl radicals	Borsarelli CD, Falomir-Lockhart LJ, OstatnÃ¡ V, Fauerbach JA, Hsiao HH, Urlaub H, PaleÄek E, Jares-Erijman EA, Jovin TM.	Free Radic Biol Med.	2012 Aug 15	53(4):1004-15.	x
22771809	α-Synuclein modulates neurite outgrowth by interacting with SPTBN1	Lee HJ, Lee K, Im H.	Biochem Biophys Res Commun.	2012 Aug 3	424(3):497-502.	x
22772723	IL6 protects MN9D cells and midbrain dopaminergic neurons from MPP+-induced neurodegeneration.	Spittau B1, Zhou X, Ming M, Krieglstein K.	Neuromolecular Med.	2012 Dec	14(4):317-27	Neuroblastoma, not SH-SY5Y
22776087	Whole genome expression profile in neuroblastoma cells exposed to 1-methyl-4-phenylpyridine.	Mazzio E1, Soliman KF.	Neurotoxicology.	2012 Oct	33(5):1156-69	Neuroblastoma, not SH-SY5Y
22809528	Tat-Frataxin protects dopaminergic neuronal cells against MPTP-induced toxicity in a mouse model of Parkinson's disease	Kim MJ, Kim DW, Jeong HJ, Sohn EJ, Shin MJ, Ahn EH, Kwon SW, Kim YN, Kim DS, Park J, Eum WS, Hwang HS, Choi SY.	Biochimie.	2012 Nov	94(11):2448-56.	x
22821477	Differential toxicity of 6-hydroxydopamine in SH-SY5Y human neuroblastoma cells and rat brain mitochondria: protective role of catalase and superoxide dismutase	Iglesias-GonzÃ¡lez J, SÃ¡nchez-Iglesias S, MÃ©ndez-Ãlvarez E, Rose S, Hikima A, Jenner P, Soto-Otero R.	Neurochem Res.	2012 Oct	37(10):2150-60.	x
22821850	Characterization of mitophagy in the 6-hydoxydopamine Parkinson's disease model	Solesio ME, Saez-Atienzar S, JordÃ¡n J, Galindo MF.	Toxicol Sci.	2012 Oct	129(2):411-20.	x
22846607	The mitochondria-targeted anti-oxidant MitoQ reduces aspects of mitochondrial fission in the 6-OHDA cell model of Parkinson's disease	Solesio ME, Prime TA, Logan A, Murphy MP, Del Mar Arroyo-Jimenez M, JordÃ¡n J, Galindo MF.	Biochim Biophys Acta.	2013 Jan	1832(1):174-82.	x
22860174	3-(Fur-2-yl)-10-(2-phenylethyl)-[1,2,4]triazino[4,3-a]benzimidazol-4(10H)-one, a novel adenosine receptor antagonist with A(2A)-mediated neuroprotective effects	Scatena A, Fornai F, Trincavelli ML, Taliani S, Daniele S, Pugliesi I, Cosconati S, Martini C, Da Settimo F.	ACS Chem Neurosci.	2011 Sep 21	2(9):526-35.	x
22869031	Latrepirdine stimulates autophagy and reduces accumulation of α-synuclein in cells and in mouse brain	Steele JW, Ju S, Lachenmayer ML, Liken J, Stock A, Kim SH, Delgado LM, Alfaro IE, Bernales S, Verdile G, Bharadwaj P, Gupta V, Barr R, Friss A, Dolios G, Wang R, Ringe D, Protter AA, Martins RN, Ehrlich ME, Yue Z, Petsko GA, et al.	Mol Psychiatry.	2013 Aug	18(8):882-8.	x
22884615	Protective effects of 27- and 24-hydroxycholesterol against staurosporine-induced cell death in undifferentiated neuroblastoma SH-SY5Y cells	Emanuelsson I, Norlin M.	Neurosci Lett.	2012 Sep 6	525(1):44-8.	Not PD specific
22894569	Carnosic acid prevents 6-hydroxydopamine-induced cell death in SH-SY5Y cells via mediation of glutathione synthesis	Chen JH, Ou HP, Lin CY, Lin FJ, Wu CR, Chang SW, Tsai CW.	Chem Res Toxicol.	2012 Sep 17	25(9):1893-901.	x
22902248	SF-6 attenuates 6-hydroxydopamine-induced neurotoxicity: an in vitro and in vivo investigation in experimental models of Parkinson's disease	Rajendra Kopalli S, Koppula S, Shin KY, Noh SJ, Jin Q, Hwang BY, Suh YH.	J Ethnopharmacol.	2012 Sep 28	143(2):686-94.	x
22902725	Altered transcription factor trafficking in oxidatively-stressed neuronal cells.	Patel VP1, Defranco DB, Chu CT.	Biochim Biophys Acta.	2012 Nov	1822(11):1773-82	x
22915117	Extracellular alpha-synuclein oligomers modulate synaptic transmission and impair LTP via NMDA-receptor activation.	Diógenes MJ1, Dias RB, Rombo DM, Vicente Miranda H, Maiolino F, Guerreiro P, Näsström T, Franquelim HG, Oliveira LM, Castanho MA, Lannfelt L, Bergström J, Ingelsson M, Quintas A, Sebastião AM, Lopes LV, Outeiro TF.	J Neurosci.	2012 Aug 22	32(34):11750-62	x
22921536	Ubiquitin proteasome system in Parkinson's disease: a keeper or a witness?	Martins-Branco D, Esteves AR, Santos D, Arduino DM, Swerdlow RH, Oliveira CR, Januario C, Cardoso SM.	Exp Neurol.	2012 Dec	238(2):89-99.	x
22922102	Glycogen synthase kinase-3β activation mediates rotenone-induced cytotoxicity with the involvement of microtubule destabilization	Hongo H, Kihara T, Kume T, Izumi Y, Niidome T, Sugimoto H, Akaike A.	Biochem Biophys Res Commun.	2012 Sep 14	426(1):94-9.	Not PD specific
22952026	Generation, purification, and characterization of cell-invasive DISC1 protein species.	Bader V1, Ottis P, Pum M, Huston JP, Korth C.	J Vis Exp.	2012 Aug 30	(66):e4132	Not PD specific
22968599	Rasagiline and selegiline, inhibitors of type B monoamine oxidase, induce type A monoamine oxidase in human SH-SY5Y cells	Inaba-Hasegawa K, Akao Y, Maruyama W, Naoi M.	J Neural Transm (Vienna).	2013 Mar	120(3):435-44.	x
22970265	Distinct effects of rotenone, 1-methyl-4-phenylpyridinium and 6-hydroxydopamine on cellular bioenergetics and cell death	Giordano S, Lee J, Darley-Usmar VM, Zhang J.	PLoS One.	2012	7(9):e44610.	x
22970289	Transcriptome analysis of a rotenone model of parkinsonism reveals complex I-tied and -untied toxicity mechanisms common to neurodegenerative diseases.	Cabeza-Arvelaiz Y1, Schiestl RH.	PLoS One.	2012	7(9):e44700	Neuroblastoma, not SH-SY5Y
22973882	Ceramide sphingolipid signaling mediates Tumor Necrosis Factor (TNF)-dependent toxicity via caspase signaling in dopaminergic neurons.	Martinez TN1, Chen X, Bandyopadhyay S, Merrill AH, Tansey MG.	Mol Neurodegener.	2012 Sep 13	0.322917	Neuroblastoma, not SH-SY5Y
22974977	Nitrosative stress mediated misfolded protein aggregation mitigated by Na-D-β-hydroxybutyrate intervention	Kabiraj P, Pal R, Varela-Ramirez A, Miranda M, Narayan M.	Biochem Biophys Res Commun.	2012 Sep 28	426(3):438-44.	x
22987761	Dysregulated expression of secretogranin III is involved in neurotoxin-induced dopaminergic neuron apoptosis	Li F, Tian X, Zhou Y, Zhu L, Wang B, Ding M, Pang H.	J Neurosci Res.	2012 Dec	90(12):2237-46.	x
22995835	Secondary RNA structure and nucleotide specificity contribute to internal initiation mediated by the human tau 5' leader.	Veo BL1, Krushel LA.	RNA Biol.	2012 Nov	9(11):1344-60	Not PD specific
23003198	A rationally designed six-residue swap generates comparability in the aggregation behavior of α-synuclein and β-synuclein	Roodveldt C, Andersson A, De Genst EJ, Labrador-Garrido A, Buell AK, Dobson CM, Tartaglia GG, Vendruscolo M.	Biochemistry.	2012 Nov 6	51(44):8771-8.	x
23010175	PEP-1-p18 prevents neuronal cell death by inhibiting oxidative stress and Bax expression	Kim DS, Sohn EJ, Kim DW, Kim YN, Eom SA, Yoon GH, Cho SW, Lee SH, Hwang HS, Cho YS, Park J, Eum WS, Choi SY.	BMB Rep.	2012 Sep	45(9):532-7.	x
23020119	Protective effects of L-dopa and carbidopa combined treatments on human catecholaminergic cells.	Colamartino M1, Padua L, Meneghini C, Leone S, Cornetta T, Testa A, Cozzi R.	DNA Cell Biol.	2012 Nov	31(11):1572-9	x
23022493	Resveratrol preconditioning increases methionine sulfoxide reductases A expression and enhances resistance of human neuroblastoma cells to neurotoxins	Wu PF, Xie N, Zhang JJ, Guan XL, Zhou J, Long LH, Li YL, Xiong QJ, Zeng JH, Wang F, Chen JG.	J Nutr Biochem.	2013 Jun	24(6):1070-7.	x
23026444	Effects of intravenous immunoglobulin on alpha synuclein aggregation and neurotoxicity.	Smith LM1, Klaver AC, Coffey MP, Dang L, Loeffler DA.	Int Immunopharmacol.	2012 Dec	14(4):550-7	Neuroblastoma, not SH-SY5Y
23026478	Protective effect of planarian DJ-1 against 6-hydroxydopamine-induced neurotoxicity	Tsushima J, Nishimura K, Tashiro N, Takata K, Ashihara E, Yoshimoto K, Ariga H, Agata K, Kitamura Y.	Neurosci Res.	2012 Dec	74(3-4):277-83.	x
23028833	The role of alpha-synuclein in melanin synthesis in melanoma and dopaminergic neuronal cells	Pan T, Zhu J, Hwu WJ, Jankovic J.	PLoS One.	2012	7(9):e45183.	x
23034917	Glucocerebrosidase deficiency in substantia nigra of parkinson disease brains.	Gegg ME1, Burke D, Heales SJ, Cooper JM, Hardy J, Wood NW, Schapira AH.	Ann Neurol.	2012 Sep	72(3):455-63	x
23047912	L-BMAA induced ER stress and enhanced caspase 12 cleavage in human neuroblastoma SH-SY5Y cells at low nonexcitotoxic concentrations	Okle O, Stemmer K, Deschl U, Dietrich DR.	Toxicol Sci.	2013 Jan	131(1):217-24.	Not PD specific
23065334	Activation of Wnt/β-catenin pathway by exogenous Wnt1 protects SH-SY5Y cells against 6-hydroxydopamine toxicity	Wei L, Sun C, Lei M, Li G, Yi L, Luo F, Li Y, Ding L, Liu Z, Li S, Xu P.	J Mol Neurosci.	2013 Jan	49(1):105-15.	x
23068419	Methylparaben protects 6-hydroxydopamine-induced neurotoxicity in SH-SY5Y cells and improved behavioral impairments in mouse model of Parkinson's disease	Kopalli SR, Noh SJ, Koppula S, Suh YH.	Neurotoxicology.	2013 Jan	34:25-32.	x
23085773	Microwave-assisted synthesis of hydroxyphenyl nitrones with protective action against oxidative stress	ChavarrÃ­a C, Perez DI, PÃ©rez C, Morales Garcia JA, Alonso-Gil S, PÃ©rez-Castillo A, Gil C, Souza JM, Porcal W.	Eur J Med Chem.	2012 Dec	58:44-9.	x
23098801	Neurotoxins released from interferon-gamma-stimulated human astrocytes	Lee M, McGeer E, McGeer PL.	Neuroscience.	2013 Jan 15	229:164-75.	x
23106698	Ï‰-3 fatty acid eicosapentaenoic acid attenuates MPP+-induced neurodegeneration in fully differentiated human SH-SY5Y and primary mesencephalic cells	Luchtman DW, Meng Q, Wang X, Shao D, Song C.	J Neurochem.	2013 Mar	124(6):855-68.	x
23109827	Neuroprotective effects of erucin against 6-hydroxydopamine-induced oxidative damage in a dopaminergic-like neuroblastoma cell line	Tarozzi A, Morroni F, Bolondi C, Sita G, Hrelia P, Djemil A, Cantelli-Forti G.	Int J Mol Sci.	2012	13(9):10899-910.	x
23121049	Functional GPR37 trafficking protects against toxicity induced by 6-OHDA, MPP+ or rotenone in a catecholaminergic cell line.	Lundius EG1, Stroth N, Vukojević V, Terenius L, Svenningsson P.	J Neurochem.	2013 Feb	124(3):410-7	Neuroblastoma, not SH-SY5Y
23142153	Retinoic acid protects against proteasome inhibition associated cell death in SH-SY5Y cells via the AKT pathway	Cheng B, Martinez AA, Morado J, Scofield V, Roberts JL, Maffi SK.	Neurochem Int.	2013 Jan	62(1):31-42.	x
23178948	PEP-1-ribosomal protein S3 protects dopaminergic neurons in an MPTP-induced Parkinson's disease mouse model	Ahn EH, Kim DW, Shin MJ, Kim YN, Kim HR, Woo SJ, Kim SM, Kim DS, Kim J, Park J, Eum WS, Hwang HS, Choi SY.	Free Radic Biol Med.	2013 Feb	55:36-45.	x
23184650	Akt/Nrf2 activated upregulation of heme oxygenase-1 involves in the role of Rg1 against ferrous iron-induced neurotoxicity in SK-N-SH cells.	Du X1, Xu H, Jiang H, Xie J.	Neurotox Res.	2013 Jul	24(1):71-9	Neuroblastoma, not SH-SY5Y
23184940	Blocking c-Jun N-terminal kinase (JNK) translocation to the mitochondria prevents 6-hydroxydopamine-induced toxicity in vitro and in vivo.	Chambers JW1, Howard S, LoGrasso PV.	J Biol Chem.	2013 Jan 11	288(2):1079-87	x
23210740	Macroautophagy in sporadic and the genetic form of Parkinson's disease with the A53T α-synuclein mutation	Huang Y, Chegini F, Chua G, Murphy K, Gai W, Halliday GM.	Transl Neurodegener.	2012 Jan 13	1(1):2.	x
23218601	Potent inhibitors of CDK5 derived from roscovitine: synthesis, biological evaluation and molecular modelling	Demange L, Abdellah FN, Lozach O, Ferandin Y, Gresh N, Meijer L, Galons H.	Bioorg Med Chem Lett.	2013 Jan 1	23(1):125-31.	Not PD specific
23220480	Dominant-negative effects of LRRK2 heterodimers: a possible mechanism of neurodegeneration in Parkinson's disease caused by LRRK2 I2020T mutation	Ohta E, Kawakami F, Kubo M, Obata F.	Biochem Biophys Res Commun.	2013 Jan 11	430(2):560-6.	x
23241934	Protective activity of guanosine in an in vitro model of Parkinson's disease	Giuliani P, Romano S, Ballerini P, Ciccarelli R, Petragnani N, Cicchitti S, Zuccarini M, Jiang S, Rathbone MP, Caciagli F, Di Iorio P.	Panminerva Med.	2012 Dec	54(1 Suppl 4):43-51.	Not accessible
23250862	Potassium depolarization and raised calcium induces α-synuclein aggregates	Follett J, Darlow B, Wong MB, Goodwin J, Pountney DL.	Neurotox Res.	2013 May	23(4):378-92.	x
23259041	Rotenone inhibits autophagic flux prior to inducing cell death	Mader BJ, Pivtoraiko VN, Flippo HM, Klocke BJ, Roth KA, Mangieri LR, Shacka JJ.	ACS Chem Neurosci.	2012 Dec 19	3(12):1063-72.	x
23261515	Dopamine but not l-dopa stimulates neural glutathione metabolism. Potential implications for Parkinson's and other dopamine deficiency states	Allen GF, Ullah Y, Hargreaves IP, Land JM, Heales SJ.	Neurochem Int.	2013 Apr	62(5):684-94.	x
23261939	Increase of oxidative stress by a novel PINK1 mutation, P209A	Chien WL, Lee TR, Hung SY, Kang KH, Wu RM, Lee MJ, Fu WM.	Free Radic Biol Med.	2013 May	58:160-9.	x
23291343	Neurorescue effects and stem properties of chorionic villi and amniotic progenitor cells.	Calzarossa C1, Bossolasco P, Besana A, Manca MP, De Grada L, De Coppi P, Giardino D, Silani V, Cova L.	Neuroscience.	2013 Mar 27	234:158-72	Not PD specific
23292542	A disruption mechanism of the molecular clock in a MPTP mouse model of Parkinson's disease	Hayashi A, Matsunaga N, Okazaki H, Kakimoto K, Kimura Y, Azuma H, Ikeda E, Shiba T, Yamato M, Yamada K, Koyanagi S, Ohdo S.	Neuromolecular Med.	2013 Jun	15(2):238-51.	x
23296100	Manganese-induced oxidative DNA damage in neuronal SH-SY5Y cells: attenuation of thymine base lesions by glutathione and N-acetylcysteine	Stephenson AP, Schneider JA, Nelson BC, Atha DH, Jain A, Soliman KF, Aschner M, Mazzio E, Renee Reams R.	Toxicol Lett.	2013 Apr 26	218(3):299-307.	x
23296837	Neuroprotective and anti-inflammatory properties of a coffee component in the MPTP model of Parkinson's disease	Lee KW, Im JY, Woo JM, Grosso H, Kim YS, Cristovao AC, Sonsalla PK, Schuster DS, Jalbut MM, Fernandez JR, Voronkov M, Junn E, Braithwaite SP, Stock JB, Mouradian MM.	Neurotherapeutics.	2013 Jan	10(1):143-53.	x
23307753	The extent of neurodegeneration and neuroprotection in two chemical in vitro models related to Parkinson's disease is critically dependent on cell culture conditions	Jantas D, Roman A, KuÅ›mierczyk J, Lorenc-Koci E, Konieczny J, Lenda T, LasoÅ" W.	Neurotox Res.	2013 Jul	24(1):41-54.	x
23307929	Accumulation of the parkin substrate, FAF1, plays a key role in the dopaminergic neurodegeneration	Sul JW, Park MY, Shin J, Kim YR, Yoo SE, Kong YY, Kwon KS, Lee YH, Kim E.	Hum Mol Genet.	2013 Apr 15	22(8):1558-73.	x
23319586	In vivo cross-linking reveals principally oligomeric forms of α-synuclein and β-synuclein in neurons and non-neural cells.	Dettmer U1, Newman AJ, Luth ES, Bartels T, Selkoe D.	J Biol Chem.	2013 Mar 1	288(9):6371-85	Neuroblastoma, not SH-SY5Y
23321539	Attenuation of MPTP/MPP(+) toxicity in vivo and in vitro by an 18-mer peptide derived from prosaposin	Gao HL, Li C, Nabeka H, Shimokawa T, Saito S, Wang ZY, Cao YM, Matsuda S.	Neuroscience.	2013 Apr 16	236:373-93.	x
23325107	Curcumin ameliorates the neurodegenerative pathology in A53T α-synuclein cell model of Parkinson's disease through the downregulation of mTOR/p70S6K signaling and the recovery of macroautophagy	Jiang TF, Zhang YJ, Zhou HY, Wang HM, Tian LP, Liu J, Ding JQ, Chen SD.	J Neuroimmune Pharmacol.	2013 Mar	8(1):356-69.	x
23329300	Berberine protects 6-hydroxydopamine-induced human dopaminergic neuronal cell death through the induction of heme oxygenase-1	Bae J, Lee D, Kim YK, Gil M, Lee JY, Lee KJ.	Mol Cells.	2013 Feb	35(2):151-7.	x
23333298	The secreted oligomeric form of α-synuclein affects multiple steps of membrane trafficking	Chai YJ, Kim D, Park J, Zhao H, Lee SJ, Chang S.	FEBS Lett.	2013 Mar 1	587(5):452-9.	x
23370975	Induction of KLF4 contributes to the neurotoxicity of MPP + in M17 cells: a new implication in Parkinson's disease.	Chen J1, Wang X, Yi X, Wang Y, Liu Q, Ge R.	J Mol Neurosci.	2013 Sep	51(1):109-17	Neuroblastoma, not SH-SY5Y
23373224	[Protective effect of six Kaixin San formulas on nerve cells injured by different materials]	Zhao HX, Zhou XJ, Hu Y, Dong XZ, Cao Y, Liu P.	Zhongguo Zhong Yao Za Zhi.	2012 Nov	37(22):3472-6.	Chinese
23377801	The association between lysosomal protein glucocerebrosidase and Parkinson's disease.	Kong B1, Yang T, Gu JW, Kuang YQ, Cheng L, Yang WT, Yang XK, Xia X, Cheng JM, Ma Y, Zhang JH, Yu SX.	Eur Rev Med Pharmacol Sci.	2013 Jan	17(2):143-51	Retracted
23380076	Tissue transglutaminase cross-links beclin 1 and regulates autophagy in MPPâº-treated human SH-SY5Y cells	Verhaar R, Drukarch B, Bol JG, Jongenelen CA, Wilhelmus MM.	Neurochem Int.	2013 Mar	62(4):486-91.	x
23403713	Microfluidic construction of minimalistic neuronal co-cultures	Dinh ND, Chiang YY, Hardelauf H, Baumann J, Jackson E, Waide S, Sisnaiske J, Frimat JP, van Thriel C, Janasek D, Peyrin JM, West J.	Lab Chip.	2013 Apr 7	13(7):1402-12.	Method description
23409128	Angiogenin in Parkinson disease models: role of Akt phosphorylation and evaluation of AAV-mediated angiogenin expression in MPTP treated mice	Steidinger TU, Slone SR, Ding H, Standaert DG, Yacoubian TA.	PLoS One.	2013	8(2):e56092.	x
23454680	Role of α-synuclein aggregation and the nuclear factor E2-related factor 2/heme oxygenase-1 pathway in iron-induced neurotoxicity.	He Q1, Song N, Jia F, Xu H, Yu X, Xie J, Jiang H.	Int J Biochem Cell Biol.	2013 Jun	45(6):1019-30	Neuroblastoma, not SH-SY5Y
23461900	In silico target fishing for the potential targets and molecular mechanisms of baicalein as an antiparkinsonian agent: discovery of the protective effects on NMDA receptor-mediated neurotoxicity	Gao L, Fang JS, Bai XY, Zhou D, Wang YT, Liu AL, Du GH.	Chem Biol Drug Des.	2013 Jun	81(6):675-87.	x
23485458	Amurensin G induces autophagy and attenuates cellular toxicities in a rotenone model of Parkinson's disease	Ryu HW, Oh WK, Jang IS, Park J.	Biochem Biophys Res Commun.	2013 Mar 29	433(1):121-6.	x
23492776	Influence of microRNA deregulation on chaperone-mediated autophagy and α-synuclein pathology in Parkinson's disease	Alvarez-Erviti L, Seow Y, Schapira AH, Rodriguez-Oroz MC, Obeso JA, Cooper JM.	Cell Death Dis.	2013 Mar 14	4:e545.	x
23497442	The role of autophagy in Parkinson's disease: rotenone-based modeling	Xiong N, Xiong J, Jia M, Liu L, Zhang X, Chen Z, Huang J, Zhang Z, Hou L, Luo Z, Ghoorah D, Lin Z, Wang T.	Behav Brain Funct.	2013 Mar 15	9:13.	x
23500604	Neuroprotective effects of aqueous extracts of Uncaria tomentosa: Insights from 6-OHDA induced cell damage and transgenic Caenorhabditis elegans model	Shi Z, Lu Z, Zhao Y, Wang Y, Zhao-Wilson X, Guan P, Duan X, Chang YZ, Zhao B.	Neurochem Int.	2013 Jun	62(7):940-7.	x
23503475	Adaptive changes in autophagy after UPS impairment in Parkinson's disease	Shen YF, Tang Y, Zhang XJ, Huang KX, Le WD.	Acta Pharmacol Sin.	2013 May	34(5):667-73.	x
23524384	Ubiquinone-quantum dot bioconjugates for in vitro and intracellular complex I sensing	Ma W, Qin LX, Liu FT, Gu Z, Wang J, Pan ZG, James TD, Long YT.	Sci Rep.	2013	3:1537.	Method description
23525905	TRAP1 rescues PINK1 loss-of-function phenotypes	Zhang L, Karsten P, Hamm S, Pogson JH, MÃ¼ller-Rischart AK, Exner N, Haass C, Whitworth AJ, Winklhofer KF, Schulz JB, Voigt A.	Hum Mol Genet.	2013 Jul 15	22(14):2829-41.	x
23526723	G51D α-synuclein mutation causes a novel parkinsonian-pyramidal syndrome.	Lesage S1, Anheim M, Letournel F, Bousset L, Honoré A, Rozas N, Pieri L, Madiona K, Dürr A, Melki R, Verny C, Brice A; French Parkinson's Disease Genetics Study Group.	Ann Neurol.	2013 Apr	73(4):459-71	x
23533492	Gastrodin protects apoptotic dopaminergic neurons in a toxin-induced Parkinson's disease model	Kumar H, Kim IS, More SV, Kim BW, Bahk YY, Choi DK.	Evid Based Complement Alternat Med.	2013	2013:514095.	x
23535362	Specific pesticide-dependent increases in α-synuclein levels in human neuroblastoma (SH-SY5Y) and melanoma (SK-MEL-2) cell lines	Chorfa A, BÃ©temps D, Morignat E, Lazizzera C, Hogeveen K, Andrieu T, Baron T.	Toxicol Sci.	2013 Jun	133(2):289-97.	x
23536331	Knocking out DJ-1 attenuates astrocytes neuroprotection against 6-hydroxydopamine toxicity.	Lev N1, Barhum Y, Ben-Zur T, Melamed E, Steiner I, Offen D.	J Mol Neurosci.	2013 Jul	50(3):542-50	x
23567447	Construction of photoenergetic mitochondria in cultured mammalian cells	Hara KY, Wada T, Kino K, Asahi T, Sawamura N.	Sci Rep.	2013	3:1635.	x
23573240	Therapeutic effect of hydrogen sulfide-releasing L-Dopa derivative ACS84 on 6-OHDA-induced Parkinson's disease rat model	Xie L, Hu LF, Teo XQ, Tiong CX, Tazzari V, Sparatore A, Del Soldato P, Dawe GS, Bian JS.	PLoS One.	2013	8(4):e60200.	x
23576548	Serine 129 phosphorylation of membrane-associated α-synuclein modulates dopamine transporter function in a G protein-coupled receptor kinase-dependent manner	Hara S, Arawaka S, Sato H, Machiya Y, Cui C, Sasaki A, Koyama S, Kato T.	Mol Biol Cell.	2013 Jun	24(11):1649-60, S1-3.	x
23580063	Loss of β-glucocerebrosidase activity does not affect alpha-synuclein levels or lysosomal function in neuronal cells	Dermentzaki G, Dimitriou E, Xilouri M, Michelakakis H, Stefanis L.	PLoS One.	2013 Apr 8	8(4):e60674.	x
23598878	[Protective effects of crude polysaccharides from Chroogomphus rutilus on SH-SY5Y cells impaired by MPP(+)]	Zhang XQ, Wang YQ, Wang LA, Guan ZL.	Sheng Li Xue Bao.	2013 Apr 25	65(2):210-6.	Chinese
23619395	Celastrol protects human neuroblastoma SH-SY5Y cells from rotenone-induced injury through induction of autophagy	Deng YN, Shi J, Liu J, Qu QM.	Neurochem Int.	2013 Jul	63(1):1-9.	x
23625270	PACAP protects against salsolinol-induced toxicity in dopaminergic SH-SY5Y cells: implication for Parkinson's disease	Brown D, Tamas A, ReglÃdi D, Tizabi Y.	J Mol Neurosci.	2013 Jul	50(3):600-7.	x
23653325	Parkinson's disease cybrids, differentiated or undifferentiated, maintain morphological and biochemical phenotypes different from those of control cybrids	Appukuttan TA, Ali N, Varghese M, Singh A, Tripathy D, Padmakumar M, Gangopadhyay PK, Mohanakumar KP.	J Neurosci Res.	2013 Jul	91(7):963-70.	x
23664925	Isradipine prevents rotenone-induced intracellular calcium rise that accelerates senescence in human neuroblastoma SH-SY5Y cells	Yu X, Li X, Jiang G, Wang X, Chang HC, Hsu WH, Li Q.	Neuroscience.	2013 Aug 29	246:243-53.	x
23665112	Secalonic acid A protects dopaminergic neurons from 1-methyl-4-phenylpyridinium (MPPâº)-induced cell death via the mitochondrial apoptotic pathway	Zhai A, Zhu X, Wang X, Chen R, Wang H.	Eur J Pharmacol.	2013 Aug 5	713(1-3):58-67.	x
23673382	Upregulation of a small vault RNA (svtRNA2-1a) is an early event in Parkinson disease and induces neuronal dysfunction	MiÃ±ones-Moyano E, FriedlÃ¤nder MR, Pallares J, Kagerbauer B, Porta S, EscaramÃ­s G, Ferrer I, Estivill X, MartÃ­ E.	RNA Biol.	2013 Jul	10(7):1093-106.	x
23685348	Hemoglobin is present as a canonical α2β2 tetramer in dopaminergic neurons.	Russo R1, Zucchelli S, Codrich M, Marcuzzi F, Verde C, Gustincich S.	Biochim Biophys Acta.	2013 Sep	1834(9):1939-43	Neuroblastoma, not SH-SY5Y
23688541	RNA interference targeting α-synuclein attenuates methamphetamine-induced neurotoxicity in SH-SY5Y cells	Chen L, Huang E, Wang H, Qiu P, Liu C.	Brain Res.	2013 Jul 12	1521:59-67.	x
23705433	[Synchrotron radiation-based FTIR microspectroscopy study of 6-hydroxydopamine induced Parkinson's disease cell model]	Zhu HY, Pei X, Wu LY, Qi ZM, Wang YY, Liu B, Zhou HG.	Guang Pu Xue Yu Guang Pu Fen Xi.	2013 Mar	33(3):686-9.	Chinese
23709364	Lycopene protects against MPP(+)-induced cytotoxicity by maintaining mitochondrial function in SH-SY5Y cells	Yi F, He X, Wang D.	Neurochem Res.	2013 Aug	38(8):1747-57.	x
23710172	Differential Effects of Methyl-4-Phenylpyridinium Ion, Rotenone, and Paraquat on Differentiated SH-SY5Y Cells	Martins JB, Bastos Mde L, Carvalho F, Capela JP.	J Toxicol.	2013	2013:347312.	x
23710708	Tenuigenin attenuates α-synuclein-induced cytotoxicity by down-regulating polo-like kinase 3	Zhou JX, Zhang HB, Huang Y, He Y, Zheng Y, Anderson JP, Gai WP, Liang ZG, Wang Y, Ren XM, Wang Q, Gong XL, Yang J, Wang X, Halliday G, Wang XM.	CNS Neurosci Ther.	2013 Sep	19(9):688-94.	x
23717608	Regulated expression of lentivirus-mediated GDNF in human bone marrow-derived mesenchymal stem cells and its neuroprotection on dopaminergic cells in vitro	Yang WH, Yang C, Xue YQ, Lu T, Reiser J, Zhao LR, Duan WM.	PLoS One.	2013 May 22	8(5):e64389.	x
23724009	Phenotypic characterization of retinoic acid differentiated SH-SY5Y cells by transcriptional profiling	Korecka JA, van Kesteren RE, Blaas E, Spitzer SO, Kamstra JH, Smit AB, Swaab DF, Verhaagen J, Bossers K.	PLoS One.	2013 May 28	8(5):e63862.	x
23751361	Reynosin protects against neuronal toxicity in dopamine-induced SH-SY5Y cells and 6-hydroxydopamine-lesioned rats as models of Parkinson's disease: Reciprocal up-regulation of E6-AP and down-regulation of α-synuclein	Ham A, Kim DW, Kim KH, Lee SJ, Oh KB, Shin J, Mar W.	Brain Res.	2013 Aug 2	1524:54-61.	x
23751758	A small molecule bidentate-binding dual inhibitor probe of the LRRK2 and JNK kinases.	Feng Y1, Chambers JW, Iqbal S, Koenig M, Park H, Cherry L, Hernandez P, Figuera-Losada M, LoGrasso PV.	ACS Chem Biol.	2013 Aug 16	8(8):1747-54	x
23757764	Boosting chaperone-mediated autophagy in vivo mitigates α-synuclein-induced neurodegeneration	Xilouri M, Brekk OR, Landeck N, Pitychoutis PM, Papasilekas T, Papadopoulou-Daifoti Z, Kirik D, Stefanis L.	Brain.	2013 Jul	136(Pt 7):2130-46.	x
23764850	Nicotinamide N-methyltransferase expression in SH-SY5Y neuroblastoma and N27 mesencephalic neurones induces changes in cell morphology via ephrin-B2 and Akt signalling	Thomas MG, Saldanha M, Mistry RJ, Dexter DT, Ramsden DB, Parsons RB.	Cell Death Dis.	2013 Jun 13	4:e669.	Not PD specific
23772688	The Parkinson's disease-associated gene PINK1 protects neurons from ischemic damage by decreasing mitochondrial translocation of the fission promoter Drp1.	Zhao Y1, Chen F, Chen S, Liu X, Cui M, Dong Q.	J Neurochem.	2013 Dec	127(5):711-22	Not PD specific
23791873	Insect peptide CopA3-induced protein degradation of p27Kip1 stimulates proliferation and protects neuronal cells from apoptosis	Nam ST, Kim DH, Lee MB, Nam HJ, Kang JK, Park MJ, Lee IH, Seok H, Lee DG, Hwang JS, Kim H.	Biochem Biophys Res Commun.	2013 Jul 19	437(1):35-40.	Not PD specific
23800665	Protection of dopaminergic neurons by 5-lipoxygenase inhibitor	Kang KH, Liou HH, Hour MJ, Liou HC, Fu WM.	Neuropharmacology.	2013 Oct	73:380-7.	x
23817009	Mitochondrial membrane permeabilisation by amyloid aggregates and protection by polyphenols	Camilleri A, Zarb C, Caruana M, Ostermeier U, Ghio S, HÃgen T, Schmidt F, Giese A, Vassallo N.	Biochim Biophys Acta.	2013 Nov	1828(11):2532-43.	Not PD specific
23818941	Cytokine receptor-like factor 1 (CRLF1) protects against 6-hydroxydopamine toxicity independent of the gp130/JAK signaling pathway.	Looyenga BD1, Resau J, MacKeigan JP.	PLoS One.	2013 Jun 20	8(6):e66548	x
23831374	Mortalin mutations are not a frequent cause of early-onset Parkinson disease.	Freimann K1, Zschiedrich K, Brüggemann N, Grünewald A, Pawlack H, Hagenah J, Lohmann K, Klein C, Westenberger A.	Neurobiol Aging.	2013 Nov	34(11):2694	x
23831389	BMP2 and GDF5 induce neuronal differentiation through a Smad dependant pathway in a model of human midbrain dopaminergic neurons	Hegarty SV, Sullivan AM, O'Keeffe GW.	Mol Cell Neurosci.	2013 Sep	56:263-71.	x
23857913	Curcumin I mediates neuroprotective effect through attenuation of quinoprotein formation, p-p38 MAPK expression, and caspase-3 activation in 6-hydroxydopamine treated SH-SY5Y cells	Meesarapee B, Thampithak A, Jaisin Y, Sanvarinda P, Suksamrarn A, Tuchinda P, Morales NP, Sanvarinda Y.	Phytother Res.	2014 Apr	28(4):611-6.	x
23867817	Heptachlor induced mitochondria-mediated cell death via impairing electron transport chain complex III	Hong S, Kim JY, Hwang J, Shin KS, Kang SJ.	Biochem Biophys Res Commun.	2013 Aug 9	437(4):632-6.	x
23868305	Neuroprotective effects of nicotinamide N-methyltransferase and its metabolite 1-methylnicotinamide	Milani ZH, Ramsden DB, Parsons RB.	J Biochem Mol Toxicol.	2013 Sep	27(9):451-6.	x
23870930	Isolation, characterization, and neuroprotective activities of sesquiterpenes from Petasites japonicus	Wang S, Jin DQ, Xie C, Wang H, Wang M, Xu J, Guo Y.	Food Chem.	2013 Dec 1	141(3):2075-82.	x
23874440	Decoding the substrate supply to human neuronal nitric oxide synthase.	Simon A1, Karbach S, Habermeier A, Closs EI.	PLoS One.	2013 Jul 9	8(7):e67707	Not PD specific
23891486	Deregulation of calcium homeostasis mediates secreted α-synuclein-induced neurotoxicity	Melachroinou K, Xilouri M, Emmanouilidou E, Masgrau R, Papazafiri P, Stefanis L, Vekrellis K.	Neurobiol Aging.	2013 Dec	34(12):2853-65.	x
23896526	Single or combined treatment with L-DOPA and quinpirole differentially modulate expression and phosphorylation of key regulatory kinases in neuroblastoma cells	Fuzzati-Armentero MT, Ghezzi C, NisticÃ² R, Oda A, Blandini F.	Neurosci Lett.	2013 Sep 27	552:168-73.	x
23900566	HIF-1α-induced β-catenin activation prevents prion-mediated neurotoxicity	Jeong JK, Park SY.	Int J Mol Med.	2013 Oct	32(4):931-7.	Not PD specific
23900721	Neuroprotective effect of CNB-001, a novel pyrazole derivative of curcumin on biochemical and apoptotic markers against rotenone-induced SK-N-SH cellular model of Parkinson's disease.	Jayaraj RL1, Tamilselvam K, Manivasagam T, Elangovan N.	J Mol Neurosci.	2013 Nov	51(3):863-70	Neuroblastoma, not SH-SY5Y
23916831	Mitochondrial ferritin in neurodegenerative diseases.	Yang H1, Yang M, Guan H, Liu Z, Zhao S, Takeuchi S, Yanagisawa D, Tooyama I.	Neurosci Res.	2013 Sep-Oct	77(1-2):1-7	Review
23918470	NOSH-aspirin (NBS-1120), a novel nitric oxide and hydrogen sulfide releasing hybrid, attenuates neuroinflammation induced by microglial and astrocytic activation: a new candidate for treatment of neurodegenerative disorders	Lee M, McGeer E, Kodela R, Kashfi K, McGeer PL.	Glia.	2013 Oct	61(10):1724-34.	Not PD specific
23939407	Changes in sphingomyelin level affect alpha-synuclein and ABCA5 expression.	Kim WS1, Halliday GM.	J Parkinsons Dis.	2012	2(1):41-6	Neuroblastoma, not SH-SY5Y
23958447	Cathepsin X promotes 6-hydroxydopamine-induced apoptosis of PC12 and SH-SY5Y cells	PiÅ¡lar AH, Zidar N, Kikelj D, Kos J.	Neuropharmacology.	2014 Jul	82:121-31.	x
23959424	Upregulation of sestrin-2 expression via P53 protects against 1-methyl-4-phenylpyridinium (MPP+) neurotoxicity	Zhou D, Zhan C, Zhong Q, Li S.	J Mol Neurosci.	2013 Nov	51(3):967-75.	x
23959789	3,4-dihydroxybenzalacetone protects against Parkinson's disease-related neurotoxin 6-OHDA through Akt/Nrf2/glutathione pathway	Gunjima K, Tomiyama R, Takakura K, Yamada T, Hashida K, Nakamura Y, Konishi T, Matsugo S, Hori O.	J Cell Biochem.	2014 Jan	115(1):151-60.	x
23959866	PINK1 regulates histone H3 trimethylation and gene expression by interaction with the polycomb protein EED/WAIT1	Berthier A, JimÃ©nez-SÃ¡inz J, Pulido R.	Proc Natl Acad Sci U S A.	2013 Sep 3	110(36):14729-34.	Retracted
23967127	Synucleins antagonize endoplasmic reticulum function to modulate dopamine transporter trafficking	Oaks AW, Marsh-Armstrong N, Jones JM, Credle JJ, Sidhu A.	PLoS One.	2013	8(8):e70872.	x
23971408	Quantitative proteomics reveals oxygen-dependent changes in neuronal mitochondria affecting function and sensitivity to rotenone	Villeneuve L, Tiede LM, Morsey B, Fox HS.	J Proteome Res.	2013 Oct 4	12(10):4599-606.	Not PD specific
23976995	Phloroglucinol attenuates motor functional deficits in an animal model of Parkinson's disease by enhancing Nrf2 activity	Ryu J, Zhang R, Hong BH, Yang EJ, Kang KA, Choi M, Kim KC, Noh SJ, Kim HS, Lee NH, Hyun JW, Kim HS.	PLoS One.	2013	8(8):e71178.	x
23979838	Parkinson's disease-associated DJ-1 mutations increase abnormal phosphorylation of tau protein through Akt/GSK-3β pathways.	Wang Y1, Liu W, He X, Zhou F.	J Mol Neurosci.	2013 Nov	51(3):911-8	Neuroblastoma, not SH-SY5Y
23984410	Rotenone upregulates alpha-synuclein and myocyte enhancer factor 2D independently from lysosomal degradation inhibition	Sala G, Arosio A, Stefanoni G, Melchionda L, Riva C, Marinig D, Brighina L, Ferrarese C.	Biomed Res Int.	2013	2013:846725.	x
23996657	Ascorbate prevents cell death from prolonged exposure to glutamate in an in vitro model of human dopaminergic neurons	Ballaz S, Morales I, RodrÃ­guez M, Obeso JA.	J Neurosci Res.	2013 Dec	91(12):1609-17.	x
24026176	YY1 binds to α-synuclein 3'-flanking region SNP and stimulates antisense noncoding RNA expression	Mizuta I, Takafuji K, Ando Y, Satake W, Kanagawa M, Kobayashi K, Nagamori S, Shinohara T, Ito C, Yamamoto M, Hattori N, Murata M, Kanai Y, Murayama S, Nakagawa M, Toda T.	J Hum Genet.	2013 Nov	58(11):711-9.	Not accessible
24040063	LPS-induced proNGF synthesis and release in the N9 and BV2 microglial cells: a new pathway underling microglial toxicity in neuroinflammation	Duan L, Chen BY, Sun XL, Luo ZJ, Rao ZR, Wang JJ, Chen LW.	PLoS One.	2013	8(9):e73768.	x
24047115	Adiponectin offers protection against L166P mutant DJ-1-induced neuronal cytotoxicity mediated by APPL1-dependent AMPK activation.	Li X1, Geng J, Liu J.	Int J Neurosci.	2014 May	124(5):350-61	Neuroblastoma, not SH-SY5Y
24051032	Monoamine oxidase-A knockdown in human neuroblastoma cells reveals protection against mitochondrial toxins	Fitzgerald JC, Ugun-Klusek A, Allen G, De Girolamo LA, Hargreaves I, Ufer C, Abramov AY, Billett EE.	FASEB J.	2014 Jan	28(1):218-29.	x
24055409	Trasferrin receptor 2 gene regulation by microRNA 221 in SH-SY5Y cells treated with MPPâº as Parkinson's disease cellular model	Asci R, Vallefuoco F, Andolfo I, Bruno M, De Falco L, Iolascon A.	Neurosci Res.	2013 Nov	77(3):121-7.	x
24075941	LRRK2 guides the actin cytoskeleton at growth cones together with ARHGEF7 and Tropomyosin 4.	Häbig K1, Gellhaar S, Heim B, Djuric V, Giesert F, Wurst W, Walter C, Hentrich T, Riess O, Bonin M.	Biochim Biophys Acta.	2013 Dec	1832(12):2352-67	x
24096134	N-Acetyl cysteine blunts proteotoxicity in a heat shock protein-dependent manner.	Jiang Y1, Rumble JL, Gleixner AM, Unnithan AS, Pulugulla SH, Posimo JM, Choi HJ, Crum TS, Pant DB, Leak RK.	Neuroscience.	2013	255:19-32	Not PD specific
24106097	A glutathione derivative with chelating and in vitro neuroprotective activities: synthesis, physicochemical properties, and biological evaluation.	Cacciatore I1, Cornacchia C, Fornasari E, Baldassarre L, Pinnen F, Sozio P, Di Stefano A, Marinelli L, Dean A, Fulle S, Di Filippo ES, La Rovere RM, Patruno A, Ferrone A, Di Marco V.	ChemMedChem.	2013 Nov	8(11):1818-29	Not PD specific
24117733	Phosphoproteomic evaluation of pharmacological inhibition of leucine-rich repeat kinase 2 reveals significant off-target effects of LRRK-2-IN-1	Luerman GC, Nguyen C, Samaroo H, Loos P, Xi H, Hurtado-Lorenzo A, Needle E, Stephen Noell G, Galatsis P, Dunlop J, Geoghegan KF, Hirst WD.	J Neurochem.	2014 Feb	128(4):561-76.	x
24122264	Protective effects of curcumin against rotenone and salsolinol-induced toxicity: implications for Parkinson's disease	Qualls Z, Brown D, Ramlochansingh C, Hurley LL, Tizabi Y.	Neurotox Res.	2014 Jan	25(1):81-9.	x
24129513	Endonuclease G mediates α-synuclein cytotoxicity during Parkinson's disease.	Büttner S1, Habernig L, Broeskamp F, Ruli D, Vögtle FN, Vlachos M, Macchi F, Küttner V, Carmona-Gutierrez D, Eisenberg T, Ring J, Markaki M, Taskin AA, Benke S, Ruckenstuhl C, Braun R, Van den Haute C, Bammens T, van der Perren A, Fröhlich KU, Winderickx J, Kroemer G, Baekelandt V, Tavernarakis N, Kovacs GG, Dengjel J, Meisinger C, Sigrist SJ, Madeo F.	EMBO J.	2013 Nov 27	32(23):3041-54	x
24130211	Changes in phosphatidylinositol 3-kinase 55Â kDa gamma expression and subcellular localization may be caspase 6 dependent in paraquat-induced SH-SY5Y apoptosis	Zhou Y, Li F, Tian X, Wang B, Ding M, Pang H.	Hum Exp Toxicol.	2014 Jul	33(7):761-71.	x
24135219	Protective effect of orexin-A on 6-hydroxydopamine-induced neurotoxicity in SH-SY5Y human dopaminergic neuroblastoma cells	Esmaeili-Mahani S, Vazifekhah S, Pasban-Aliabadi H, Abbasnejad M, Sheibani V.	Neurochem Int.	2013 Dec	63(8):719-25.	x
24138030	Over-expression of an inactive mutant cathepsin D increases endogenous alpha-synuclein and cathepsin B activity in SH-SY5Y cells	Crabtree D, Dodson M, Ouyang X, Boyer-Guittaut M, Liang Q, Ballestas ME, Fineberg N, Zhang J.	J Neurochem.	2014 Mar	128(6):950-61.	x
24142350	Protective effects of zonisamide against rotenone-induced neurotoxicity	Condello S, CurrÃ² M, Ferlazzo N, Costa G, Visalli G, Caccamo D, Pisani LR, Costa C, Calabresi P, Ientile R, Pisani F.	Neurochem Res.	2013 Dec	38(12):2631-9.	x
24151868	Beyond the mitochondrion: cytosolic PINK1 remodels dendrites through protein kinase A	Dagda RK, Pien I, Wang R, Zhu J, Wang KZ, Callio J, Banerjee TD, Dagda RY, Chu CT.	J Neurochem.	2014 Mar	128(6):864-77.	x
24156260	Pan-amyloid oligomer specific scFv antibody attenuates memory deficits and brain amyloid burden in mice with Alzheimer's disease	Zhao M, Wang SW, Wang YJ, Zhang R, Li YN, Su YJ, Zhou WW, Yu XL, Liu RT.	Curr Alzheimer Res.	2014 Jan	11(1):69-78.	Not PD specific
24159358	P90RSK and Nrf2 Activation via MEK1/2-ERK1/2 Pathways Mediated by Notoginsenoside R2 to Prevent 6-Hydroxydopamine-Induced Apoptotic Death in SH-SY5Y Cells	Meng XB, Sun GB, Wang M, Sun J, Qin M, Sun XB.	Evid Based Complement Alternat Med.	2013	2013:971712.	x
24162725	Endonuclease-G and the pathways to dopaminergic neurodegeneration: a question of location?	Hogg MC1, Prehn JH.	EMBO J.	2013 Nov 27	32(23):3014-6	Comment
24163249	Catecholamine metabolism drives generation of mitochondrial DNA deletions in dopaminergic neurons.	Neuhaus JF1, Baris OR, Hess S, Moser N, Schröder H, Chinta SJ, Andersen JK, Kloppenburg P, Wiesner RJ.	Brain.	2014 Feb	137(Pt 2):354-65	x
24165324	Leucine-rich repeat kinaseÂ 2 regulates tau phosphorylation through direct activation of glycogen synthase kinase-3β	Kawakami F, Shimada N, Ohta E, Kagiya G, Kawashima R, Maekawa T, Maruyama H, Ichikawa T.	FEBS J.	2014 Jan	281(1):3-13.	x
24183966	Pro-inflammatory cytokine-mediated ferroportin down-regulation contributes to the nigral iron accumulation in lipopolysaccharide-induced Parkinsonian models	Zhang Z, Hou L, Song JL, Song N, Sun YJ, Lin X, Wang XL, Zhang FZ, Ge YL.	Neuroscience.	2014 Jan 17	257:20-30.	x
24184327	Mitochondrial impairment increases FL-PINK1 levels by calcium-dependent gene expression	GÃ³mez-SÃ¡nchez R, Gegg ME, Bravo-San Pedro JM, Niso-Santano M, Alvarez-Erviti L, Pizarro-Estrella E, GutiÃ©rrez-MartÃ­n Y, Alvarez-Barrientos A, Fuentes JM, GonzÃ¡lez-Polo RA, Schapira AH.	Neurobiol Dis.	2014 Feb	62:426-40.	x
24205164	Neuroprotective effects of protocatechuic aldehyde against neurotoxin-induced cellular and animal models of Parkinson's disease	Zhao X, Zhai S, An MS, Wang YH, Yang YF, Ge HQ, Liu JH, Pu XP.	PLoS One.	2013	8(10):e78220.	SH-SY5Y used in previous studies
24205431	Neuroprotective effects of hesperidin, a plant flavanone, on rotenone-induced oxidative stress and apoptosis in a cellular model for Parkinson's disease.	Tamilselvam K1, Braidy N, Manivasagam T, Essa MM, Prasad NR, Karthikeyan S, Thenmozhi AJ, Selvaraju S, Guillemin GJ.	Oxid Med Cell Longev.	2013	2013:102741	Neuroblastoma, not SH-SY5Y
24214023	Celastrol from 'Thunder God Vine' protects SH-SY5Y cells through the preservation of mitochondrial function and inhibition of p38 MAPK in a rotenone model of Parkinson's disease	Choi BS, Kim H, Lee HJ, Sapkota K, Park SE, Kim S, Kim SJ.	Neurochem Res.	2014 Jan	39(1):84-96.	x
24219236	Mitigation of ROS insults by Streptomyces secondary metabolites in primary cortical neurons.	Leirós M1, Alonso E, Sanchez JA, Rateb ME, Ebel R, Houssen WE, Jaspars M, Alfonso A, Botana LM.	ACS Chem Neurosci.	2014 Jan 15	5(1):71-80	Not PD specific
24233519	The novel tetramethylpyrazine bis-nitrone (TN-2) protects against MPTP/MPP+-induced neurotoxicity via inhibition of mitochondrial-dependent apoptosis	Xu D, Duan H, Zhang Z, Cui W, Wang L, Sun Y, Lang M, Hoi PM, Han Y, Wang Y, Lee SM.	J Neuroimmune Pharmacol.	2014 Mar	9(2):245-58.	x
24244333	Profiling of Parkin-binding partners using tandem affinity purification	Zanon A, Rakovic A, Blankenburg H, Doncheva NT, Schwienbacher C, Serafin A, Alexa A, Weichenberger CX, Albrecht M, Klein C, Hicks AA, Pramstaller PP, Domingues FS, Pichler I.	PLoS One.	2013	8(11):e78648.	x
24250222	Pathway Analysis of ChIP-Seq-Based NRF1 Target Genes Suggests a Logical Hypothesis of their Involvement in the Pathogenesis of Neurodegenerative Diseases.	Satoh J1, Kawana N, Yamamoto Y.	Gene Regul Syst Bio.	2013 Nov 4	7:139-52	Not PD specific
24252343	Neuroprotective effects of extract of Acanthopanax senticosus harms on SH-SY5Y cells overexpressing wild-type or A53T mutant α-synuclein	Li XZ, Zhang SN, Wang KX, Liu HY, Yang ZM, Liu SM, Lu F.	Phytomedicine.	2014 Apr 15	21(5):704-11.	x
24252728	TRPC1 protects dopaminergic SH-SY5Y cells from MPP+, salsolinol, and N-methyl-(R)-salsolinol-induced cytotoxicity	Arshad A, Chen X, Cong Z, Qing H, Deng Y.	Acta Biochim Biophys Sin (Shanghai).	2014 Jan	46(1):22-30.	x
24269647	Downregulation of PMCA2 increases the vulnerability of midbrain neurons to mitochondrial complex I inhibition	Brendel A, Renziehausen J, Behl C, Hajieva P.	Neurotoxicology.	2014 Jan	40:43-51.	x
24269733	The protective role of AMP-activated protein kinase in alpha-synuclein neurotoxicity in vitro	Dulovic M, Jovanovic M, Xilouri M, Stefanis L, Harhaji-Trajkovic L, Kravic-Stevovic T, Paunovic V, Ardah MT, El-Agnaf OM, Kostic V, Markovic I, Trajkovic V.	Neurobiol Dis.	2014 Mar	63:1-11.	x
24269918	Modulation of human α-synuclein aggregation by a combined effect of calcium and dopamine.	Jain MK1, Bhat R2.	Neurobiol Dis.	2014 Mar	63:115-28	x
24273027	5-S-cysteinyldopamine neurotoxicity: Influence on the expression of α-synuclein and ERp57 in cellular and animal models of Parkinson's disease	Aureli C, Cassano T, Masci A, Francioso A, Martire S, Cocciolo A, Chichiarelli S, Romano A, Gaetani S, Mancini P, Fontana M, d'Erme M, Mosca L.	J Neurosci Res.	2014 Mar	92(3):347-58.	x
24278419	A new method for quantitative immunoblotting of endogenous α-synuclein.	Newman AJ1, Selkoe D, Dettmer U.	PLoS One.	2013 Nov 20	8(11):e81314	x
24282027	Functional interaction of Parkinson's disease-associated LRRK2 with members of the dynamin GTPase superfamily.	Stafa K1, Tsika E, Moser R, Musso A, Glauser L, Jones A, Biskup S, Xiong Y, Bandopadhyay R, Dawson VL, Dawson TM, Moore DJ.	Hum Mol Genet.	2014 Apr 15	2055-77	x
24286619	Transcriptional regulation of human USP24 gene expression by NF-kappa B	Wang K, Liu S, Wang J, Wu Y, Cai F, Song W.	J Neurochem.	2014 Mar	128(6):818-28.	x
24288000	Baicalein prevents 6-hydroxydopamine-induced mitochondrial dysfunction in SH-SY5Y cells via inhibition of mitochondrial oxidation and up-regulation of DJ-1 protein expression	Wang YH, Yu HT, Pu XP, Du GH.	Molecules.	2013 Nov 27	18(12):14726-38.	x
24288134	Dopamine and Cu+/2+ can induce oligomerization of α-synuclein in the absence of oxygen: Two types of oligomerization mechanisms for α-synuclein and related cell toxicity studies.	Ha Y1, Yang A, Lee S, Kim K, Liew H, Lee SH, Lee JE, Lee HI, Suh YH, Park HS, Churchill DG.	J Neurosci Res.	2014 Mar	92(3):359-68	x
24291725	Comparative study of the neurotrophic effects elicited by VEGF-B and GDNF in preclinical in vivo models of Parkinson's disease	Yue X, Hariri DJ, Caballero B, Zhang S, Bartlett MJ, Kaut O, Mount DW, WÃ¼llner U, Sherman SJ, Falk T.	Neuroscience.	2014 Jan 31	258:385-400.	x
24291744	Abnormal differentiation of dopaminergic neurons in zebrafish trpm7 mutant larvae impairs development of the motor pattern	Decker AR, McNeill MS, Lambert AM, Overton JD, Chen YC, Lorca RA, Johnson NA, Brockerhoff SE, Mohapatra DP, MacArthur H, Panula P, Masino MA, Runnels LW, Cornell RA.	Dev Biol.	2014 Feb 15	386(2):428-39.	x
24297062	Hyperspectral fluorescence imaging for cellular iron mapping in the in vitro model of Parkinson's disease.	Oh ES1, Heo C, Kim JS, Suh M, Lee YH, Kim JM.	J Biomed Opt.	2014 May	19(5):051207	x
24304935	Discovery of the neuroprotective effects of alvespimycin by computational prioritization of potential anti-Parkinson agents	Gao L, Zhao G, Fang JS, Yuan TY, Liu AL, Du GH.	FEBS J.	2014 Feb	281(4):1110-22.	x
24305623	Therapeutic effects of multifunctional tetramethylpyrazine nitrone on models of Parkinson's disease in vitro and in vivo	Guo B, Xu D, Duan H, Du J, Zhang Z, Lee SM, Wang Y.	Biol Pharm Bull.	2014	37(2):274-85.	x
24321511	N-terminus regulation of VMAT2 mediates methamphetamine-stimulated efflux.	Torres B1, Ruoho AE2.	Neuroscience.	2014 Feb 14	259:194-202	Not PD specific
24333330	Naringenin protects against 6-OHDA-induced neurotoxicity via activation of the Nrf2/ARE signaling pathway	Lou H, Jing X, Wei X, Shi H, Ren D, Zhang X.	Neuropharmacology.	2014 Apr	79:380-8.	x
24334130	Inhibition of PKR protects against tunicamycin-induced apoptosis in neuroblastoma cells.	Vaughn LS1, Snee B1, Patel RC2.	Gene.	2014 Feb 15	536(1):90-6	Not PD specific
24338651	Development and analysis of semi-interpenetrating polymer networks for brain injection in neurodegenerative disorders	Tunesi M, Batelli S, Rodilossi S, Russo T, Grimaldi A, Forloni G, Ambrosio L, Cigada A, Gloria A, Albani D, Giordano C.	Int J Artif Organs.	2013 Nov	36(11):762-74.	Not accessible
24341565	Morphine protects SH-SY5Y human neuroblastoma cells against 6-hydroxydopamine-induced cell damage: involvement of anti-oxidant, calcium blocking, and anti-apoptotic properties	Elyasi L, Eftekhar-Vaghefi SH, Esmaeili-Mahani S.	Rejuvenation Res.	2014 Jun	17(3):255-63.	x
24341912	SNJ-1945, a calpain inhibitor, protects SH-SY5Y cells against MPP(+) and rotenone	Knaryan VH, Samantaray S, Park S, Azuma M, Inoue J, Banik NL.	J Neurochem.	2014 Jul	130(2):280-90.	x
24351065	Histone decacetylase inhibitors prevent mitochondrial fragmentation and elicit early neuroprotection against MPP+	Zhu M, Li WW, Lu CZ.	CNS Neurosci Ther.	2014 Apr	20(4):308-16.	x
24374061	PPARγ activation rescues mitochondrial function from inhibition of complex I and loss of PINK1.	Corona JC1, de Souza SC1, Duchen MR2.	Exp Neurol.	2014 Mar	253:16-27	x
24375821	DNA methylation of the MAPT gene in Parkinson's disease cohorts and modulation by vitamin E in vitro.	Coupland KG1, Mellick GD, Silburn PA, Mather K, Armstrong NJ, Sachdev PS, Brodaty H, Huang Y, Halliday GM, Hallupp M, Kim WS, Dobson-Stone C, Kwok JB.	Mov Disord.	2014 Nov	29(13):1606-14.	Neuroblastoma, not SH-SY5Y
24378908	Nicotine exploits a COPI-mediated process for chaperone-mediated up-regulation of its receptors.	Henderson BJ1, Srinivasan R, Nichols WA, Dilworth CN, Gutierrez DF, Mackey ED, McKinney S, Drenan RM, Richards CI, Lester HA.	J Gen Physiol.	2014 Jan	143(1):51-66	Not PD specific
24395092	Pinocembrin protects SH-SY5Y cells against MPP+-induced neurotoxicity through the mitochondrial apoptotic pathway	Wang Y, Gao J, Miao Y, Cui Q, Zhao W, Zhang J, Wang H.	J Mol Neurosci.	2014 Aug	53(4):537-45.	x
24399507	Sphingosine kinase 1 and sphingosine-1-phosphate in oxidative stress evoked by 1-methyl-4-phenylpyridinium (MPP+) in human dopaminergic neuronal cells	Pyszko J, Strosznajder JB.	Mol Neurobiol.	2014 Aug	50(1):38-48.	x
24407237	Mitochondrial dysfunction, oxidative stress, and neurodegeneration elicited by a bacterial metabolite in a C. elegans Parkinson's model	Ray A, Martinez BA, Berkowitz LA, Caldwell GA, Caldwell KA.	Cell Death Dis.	2014 Jan 9	5:e984.	SH-SY5Y used in previous studies
24412329	PEP-1-PEA-15 protects against toxin-induced neuronal damage in a mouse model of Parkinson's disease	Ahn EH, Kim DW, Shin MJ, Kim HR, Kim SM, Woo SJ, Eom SA, Jo HS, Kim DS, Cho SW, Park J, Eum WS, Choi SY.	Biochim Biophys Acta.	2014 Jun	1840(6):1686-700.	x
24414307	Protective effect of arctigenin against MPP+ and MPTP-induced neurotoxicity	Li D, Liu Q, Jia D, Dou D, Wang X, Kang T.	Planta Med.	2014 Jan	80(1):48-55.	x
24418467	Salubrinal protects against rotenone-induced SH-SY5Y cell death via ATF4-parkin pathway	Wu L, Luo N, Zhao HR, Gao Q, Lu J, Pan Y, Shi JP, Tian YY, Zhang YD.	Brain Res.	2014 Feb 26	1549:52-62.	x
24440915	Eucommia ulmoides Oliv. bark. attenuates 6-hydroxydopamine-induced neuronal cell death through inhibition of oxidative stress in SH-SY5Y cells	Kwon SH, Ma SX, Hong SI, Kim SY, Lee SY, Jang CG.	J Ethnopharmacol.	2014 Feb 27	152(1):173-82.	x
24448790	Caffeoylquinic acids in Centella asiatica protect against amyloid-β toxicity	Gray NE, MorrÃ© J, Kelley J, Maier CS, Stevens JF, Quinn JF, Soumyanath A.	J Alzheimers Dis.	2014	40(2):359-73.	Not PD specific
24451142	Resveratrol partially prevents rotenone-induced neurotoxicity in dopaminergic SH-SY5Y cells through induction of heme oxygenase-1 dependent autophagy	Lin TK, Chen SD, Chuang YC, Lin HY, Huang CR, Chuang JH, Wang PW, Huang ST, Tiao MM, Chen JB, Liou CW.	Int J Mol Sci.	2014 Jan 22	15(1):1625-46.	x
24462953	Mechanical stretch exacerbates the cell death in SH-SY5Y cells exposed to paraquat: mitochondrial dysfunction and oxidative stress	Wang F, Franco R, Skotak M, Hu G, Chandra N.	Neurotoxicology.	2014 Mar	41:54-63.	x
24473149	Ret rescues mitochondrial morphology and muscle degeneration of Drosophila Pink1 mutants.	Klein P1, Müller-Rischart AK, Motori E, Schönbauer C, Schnorrer F, Winklhofer KF, Klein R.	EMBO J.	2014 Feb 18	33(4):341-55	x
24493626	Mangiferin antagonizes rotenone: induced apoptosis through attenuating mitochondrial dysfunction and oxidative stress in SK-N-SH neuroblastoma cells.	Kavitha M1, Manivasagam T, Essa MM, Tamilselvam K, Selvakumar GP, Karthikeyan S, Thenmozhi JA, Subash S.	Neurochem Res.	2014 Apr	39(4):668-76	Neuroblastoma, not SH-SY5Y
24499676	PEP-1-HO-1 prevents MPTP-induced degeneration of dopaminergic neurons in a Parkinson's disease mouse model	Youn JK, Kim DW, Kim ST, Park SY, Yeo EJ, Choi YJ, Lee HR, Kim DS, Cho SW, Han KH, Park J, Eum WS, Hwang HS, Choi SY.	BMB Rep.	2014 Oct	47(10):569-74.	x
24508709	The P2X7 receptor antagonist Brilliant Blue G attenuates contralateral rotations in a rat model of Parkinsonism through a combined control of synaptotoxicity, neurotoxicity and gliosis	Carmo MR, Menezes AP, Nunes AC, PliÃ¡ssova A, Rolo AP, Palmeira CM, Cunha RA, Canas PM, Andrade GM.	Neuropharmacology.	2014 Jun	81:142-52.	x
24510749	Myricitrin alleviates methylglyoxal-induced mitochondrial dysfunction and AGEs/RAGE/NF-ÎºB pathway activation in SH-SY5Y cells	Wang YH, Yu HT, Pu XP, Du GH.	J Mol Neurosci.	2014 Aug	53(4):562-70.	x
24511594	Prefoldin prevents aggregation of α-synuclein.	Takano M, Tashiro E, Kitamura A, Maita H, Iguchi-Ariga SM, Kinjo M, Ariga H.	Brain Res.	2014 Jan 13	1542:186-94	Neuroblastoma, not SH-SY5Y
24522518	Corynoxine, a natural autophagy enhancer, promotes the clearance of alpha-synuclein via Akt/mTOR pathway.	Chen LL1, Song JX, Lu JH, Yuan ZW, Liu LF, Durairajan SS, Li M.	J Neuroimmune Pharmacol.	2014 Jun	9(3):380-7	x
24528157	Neuroprotective potentials of neurotrophin rich olfactory ensheathing cell's conditioned media against 6OHDA-induced oxidative damage	Shukla A, Mohapatra TM, Parmar D, Seth K.	Free Radic Res.	2014 May	48(5):560-71.	x
24549762	Rutin from Dendropanax morbifera Leveille protects human dopaminergic cells against rotenone induced cell injury through inhibiting JNK and p38 MAPK signaling	Park SE, Sapkota K, Choi JH, Kim MK, Kim YH, Kim KM, Kim KJ, Oh HN, Kim SJ, Kim S.	Neurochem Res.	2014 Apr	39(4):707-18.	x
24561157	Number and Brightness analysis of alpha-synuclein oligomerization and the associated mitochondrial morphology alterations in live cells	Plotegher N, Gratton E, Bubacco L.	Biochim Biophys Acta.	2014 Jun	1840(6):2014-24.	x
24574503	Ambroxol improves lysosomal biochemistry in glucocerebrosidase mutation-linked Parkinson disease cells.	McNeill A1, Magalhaes J, Shen C, Chau KY, Hughes D, Mehta A, Foltynie T, Cooper JM, Abramov AY, Gegg M, Schapira AH.	Brain.	2014 May	137(Pt 5):1481-95	x
24576911	Interleukin-6 enhances manganese accumulation in SH-SY5Y cells: implications of the up-regulation of ZIP14 and the down-regulation of ZnT10	Fujishiro H, Yoshida M, Nakano Y, Himeno S.	Metallomics.	2014 Apr	6(4):944-9.	x
24577234	Heptachlor induced nigral dopaminergic neuronal loss and Parkinsonism-like movement deficits in mice	Hong S, Hwang J, Kim JY, Shin KS, Kang SJ.	Exp Mol Med.	2014 Feb 28	46:e80.	x
24625574	Tat-fused recombinant human SAG prevents dopaminergic neurodegeneration in a MPTP-induced Parkinson's disease model	Sohn EJ, Shin MJ, Kim DW, Ahn EH, Jo HS, Kim DS, Cho SW, Han KH, Park J, Eum WS, Hwang HS, Choi SY.	Mol Cells.	2014 Mar	37(3):226-33.	x
24631677	Dopamine down-regulation of protein L-isoaspartyl methyltransferase is dependent on reactive oxygen species in SH-SY5Y cells	Ouazia D, Levros LC Jr, Rassart E, Desrosiers RR.	Neuroscience.	2014 May 16	267:263-76.	x
24671417	Lysine 27 ubiquitination of the mitochondrial transport protein Miro is dependent on serine 65 of the Parkin ubiquitin ligase.	Birsa N1, Norkett R1, Wauer T2, Mevissen TE2, Wu HC3, Foltynie T3, Bhatia K3, Hirst WD4, Komander D2, Plun-Favreau H3, Kittler JT5.	J Biol Chem.	2014 May 23	289(21):14569-82	x
24675778	Mitochondrial proteomics investigation of a cellular model of impaired dopamine homeostasis, an early step in Parkinson's disease pathogenesis	Alberio T, Bondi H, Colombo F, Alloggio I, Pieroni L, Urbani A, Fasano M.	Mol Biosyst.	2014 Jun	10(6):1332-44.	x
24708242	Transient neuroprotection by SRY upregulation in dopamine cells following injury in males	Czech DP, Lee J, Correia J, Loke H, MÃller EK, Harley VR.	Endocrinology.	2014 Jul	155(7):2602-12.	x
24713472	Neuroprotective effects of metabotropic glutamate receptor group II and III activators against MPP(+)-induced cell death in human neuroblastoma SH-SY5Y cells: the impact of cell differentiation state	Jantas D, Greda A, Golda S, Korostynski M, Grygier B, Roman A, Pilc A, Lason W.	Neuropharmacology.	2014 Aug	83:36-53.	x
24726706	Neuroprotective effects of the andrographolide analogue AL-1 in the MPPâº/MPTP-induced Parkinson's disease model in vitro and in mice	Zhang Z, Lai D, Wang L, Yu P, Zhu L, Guo B, Xu L, Zhou L, Sun Y, Lee SM, Wang Y.	Pharmacol Biochem Behav.	2014 Jul	122:191-202.	x
24728187	The novel Parkinson's disease linked mutation G51D attenuates in vitro aggregation and membrane binding of α-synuclein, and enhances its secretion and nuclear localization in cells.	Fares MB1, Ait-Bouziad N1, Dikiy I2, Mbefo MK1, Jovičić A3, Kiely A4, Holton JL4, Lee SJ5, Gitler AD3, Eliezer D2, Lashuel HA6.	Hum Mol Genet.	2014 Sep 1	23(17):4491-509	x
24740430	PACAP protects against inflammatory-mediated toxicity in dopaminergic SH-SY5Y cells: implication for Parkinson's disease	Brown D, Tamas A, Reglodi D, Tizabi Y.	Neurotox Res.	2014 Oct	26(3):230-9.	x
24743743	Reduced IRE1α mediates apoptotic cell death by disrupting calcium homeostasis via the InsP3 receptor	Son SM, Byun J, Roh SE, Kim SJ, Mook-Jung I.	Cell Death Dis.	2014 Apr 17	5:e1188.	Not PD specific
24746619	Hsp27 suppresses the Cu(2+)-induced amyloidogenicity, redox activity, and cytotoxicity of α-synuclein by metal ion stripping.	Asthana A1, Bollapalli M1, Tangirala R1, Bakthisaran R2, Mohan Rao Ch3.	Free Radic Biol Med.	2014 Jul	72:176-90	Not PD specific
24751806	Loss of PINK1 impairs stress-induced autophagy and cell survival	Parganlija D, Klinkenberg M, DomÃ­nguez-Bautista J, Hetzel M, Gispert S, Chimi MA, DrÃse S, Mai S, Brandt U, Auburger G, Jendrach M.	PLoS One.	2014	9(4):e95288.	x
24754178	[Effect of chaperone-mediated autophagy in MPP(+) -induced SH-SY5Y cells and interventional effect of puerarin]	Wang XC, Wang X, Li QL.	Zhongguo Zhong Yao Za Zhi.	2014 Jan	39(1):106-12.	Chinese
24755484	Involvement of ERK1/2 pathway in neuroprotective effects of pyrroloquinoline quinine against rotenone-induced SH-SY5Y cell injury	Zhang Q, Zhang J, Jiang C, Qin J, Ke K, Ding F.	Neuroscience.	2014 Jun 13	270:183-91.	x
24768803	The estrogen receptor β-PI3K/Akt pathway mediates the cytoprotective effects of tocotrienol in a cellular Parkinson's disease model	Nakaso K, Tajima N, Horikoshi Y, Nakasone M, Hanaki T, Kamizaki K, Matsura T.	Biochim Biophys Acta.	2014 Sep	1842(9):1303-12.	x
24792244	Decreased SIRT2 activity leads to altered microtubule dynamics in oxidatively-stressed neuronal cells: implications for Parkinson's disease.	Patel VP1, Chu CT2.	Exp Neurol.	2014 Jul	257:170-81	x
24793810	Rosiglitazone inhibits chlorpyrifos-induced apoptosis via modulation of the oxidative stress and inflammatory response in SH-SY5Y cells	Lee JE, Park JH, Jang SJ, Koh HC.	Toxicol Appl Pharmacol.	2014 Jul 15	278(2):159-71.	x
24795107	iTRAQ-based quantitative proteomics study on the neuroprotective effects of extract of Acanthopanax senticosus harm on SH-SY5Y cells overexpressing A53T mutant α-synuclein	Li XZ, Zhang SN, Wang KX, Liu SM, Lu F.	Neurochem Int.	2014 Jun	72:37-47.	x
24796676	Neurotropic and neuroprotective activities of the earthworm peptide Lumbricusin	Kim DH, Lee IH, Nam ST, Hong J, Zhang P, Hwang JS, Seok H, Choi H, Lee DG, Kim JI, Kim H.	Biochem Biophys Res Commun.	2014 Jun 6	448(3):292-7.	x
24798695	PARK13 regulates PINK1 and subcellular relocation patterns under oxidative stress in neurons.	Patil KS1, Basak I, Lee S, Abdullah R, Larsen JP, Møller SG.	J Neurosci Res.	2014 Sep	92(9):1167-77	x
24801546	Sulfuretin inhibits 6-hydroxydopamine-induced neuronal cell death via reactive oxygen species-dependent mechanisms in human neuroblastoma SH-SY5Y cells	Kwon SH, Ma SX, Lee SY, Jang CG.	Neurochem Int.	2014 Jul	74:53-64.	x
24804146	Dopamine Cytotoxicity Involves Both Oxidative and Nonoxidative Pathways in SH-SY5Y Cells: Potential Role of Alpha-Synuclein Overexpression and Proteasomal Inhibition in the Etiopathogenesis of Parkinson's Disease	Banerjee K, Munshi S, Sen O, Pramanik V, Roy Mukherjee T, Chakrabarti S.	Parkinsons Dis.	2014	2014:878935.	x
24806433	Quantitative proteomic analysis reveals mitochondrial protein changes in MPP(+)-induced neuronal cells	Choi JW, Song MY, Park KS.	Mol Biosyst.	2014 Jul	10(7):1940-7.	x
24810045	Metformin lowers Ser-129 phosphorylated α-synuclein levels via mTOR-dependent protein phosphatase 2A activation	PÃ©rez-Revuelta BI, Hettich MM, Ciociaro A, Rotermund C, Kahle PJ, Krauss S, Di Monte DA.	Cell Death Dis.	2014 May 8	5:e1209.	x
24832624	Endogenous neurotoxic dopamine derivative covalently binds to Parkinson's disease-associated ubiquitin C-terminal hydrolase L1 and alters its structure and function	Contu VR, Kotake Y, Toyama T, Okuda K, Miyara M, Sakamoto S, Samizo S, Sanoh S, Kumagai Y, Ohta S.	J Neurochem.	2014 Sep	130(6):826-38.	x
24842651	Lack of neuroprotective effect of celastrol under conditions of proteasome inhibition by lactacystin in in vitro and in vivo studies: implications for Parkinson's disease	Konieczny J, Jantas D, Lenda T, Domin H, Czarnecka A, Kuter K, ÅšmiaÅ‚owska M, LasoÅ" W, Lorenc-Koci E.	Neurotox Res.	2014 Oct	26(3):255-73.	x
24848007	Neuroprotective effects of bikaverin on H2O2-induced oxidative stress mediated neuronal damage in SH-SY5Y cell line	Nirmaladevi D, Venkataramana M, Chandranayaka S, Ramesha A, Jameel NM, Srinivas C.	Cell Mol Neurobiol.	2014 Oct	34(7):973-85.	x
24860980	Reductions of the components of the calreticulin/calnexin quality-control system by proteasome inhibitors and their relevance in a rodent model of Parkinson's disease	Kuang XL, Liu F, Chen H, Li Y, Liu Y, Xiao J, Shan G, Li M, Snider BJ, Qu J, Barger SW, Wu S.	J Neurosci Res.	2014 Oct	92(10):1319-29.	x
24863694	Protective effects of the thioredoxin and glutaredoxin systems in dopamine-induced cell death	Arodin L, Miranda-Vizuete A, Swoboda P, Fernandes AP.	Free Radic Biol Med.	2014 Aug	73:328-36.	x
24866057	Hydrogen peroxide responsive miR153 targets Nrf2/ARE cytoprotection in paraquat induced dopaminergic neurotoxicity	Narasimhan M, Riar AK, Rathinam ML, Vedpathak D, Henderson G, Mahimainathan L.	Toxicol Lett.	2014 Aug 4	228(3):179-91.	x
24880087	Temsirolimus attenuates tauopathy inÂ vitro and inÂ vivo by targeting tau hyperphosphorylation and autophagic clearance	Jiang T, Yu JT, Zhu XC, Zhang QQ, Cao L, Wang HF, Tan MS, Gao Q, Qin H, Zhang YD, Tan L.	Neuropharmacology.	2014 Oct	85:121-30.	Not PD specific
24885905	In silico modeling of the effects of alpha-synuclein oligomerization on dopaminergic neuronal homeostasis	Ouzounoglou E, Kalamatianos D, Emmanouilidou E, Xilouri M, Stefanis L, Vekrellis K, Manolakos ES.	BMC Syst Biol.	2014 May 13	8:54.	x
24886419	Heat shock protein 60: an endogenous inducer of dopaminergic cell death in Parkinson disease	Noelker C, Morel L, Osterloh A, Alvarez-Fischer D, Lescot T, Breloer M, Gold M, Oertel WH, Henze C, Michel PP, Dodel RC, Lu L, Hirsch EC, Hunot S, Hartmann A.	J Neuroinflammation.	2014 May 8	11:86.	x
24898419	Defined α-synuclein prion-like molecular assemblies spreading in cell culture	AuliÄ‡ S, Le TT, Moda F, Abounit S, Corvaglia S, Casalis L, Gustincich S, Zurzolo C, Tagliavini F, Legname G.	BMC Neurosci.	2014 Jun 4	15:69.	x
24899725	Regulation of the VHL/HIF-1 pathway by DJ-1.	Parsanejad M1, Zhang Y1, Qu D1, Irrcher I2, Rousseaux MW1, Aleyasin H1, Kamkar F1, Callaghan S1, Slack RS1, Mak TW3, Lee S1, Figeys D4, Park DS5.	J Neurosci.	2014 Jun 4	34(23):8043-50	x
24917786	In silico, in vitro and cellular analysis with a kinome-wide inhibitor panel correlates cellular LRRK2 dephosphorylation to inhibitor activity on LRRK2	Vancraenenbroeck R, De Raeymaecker J, Lobbestael E, Gao F, De Maeyer M, Voet A, Baekelandt V, Taymans JM.	Front Mol Neurosci.	2014	7:51.	Not PD specific
24928088	Neuroprotective role of BNIP3 under oxidative stress through autophagy in neuroblastoma cells.	Awan MU1, Hasan M, Iqbal J, Lei R, Lee WF, Hong M, Qing H, Deng Y.	Mol Biol Rep.	2014 Sep	41(9):5729-34	Not PD specific
24932697	Gastrodin protects against MPP(+)-induced oxidative stress by up regulates heme oxygenase-1 expression through p38 MAPK/Nrf2 pathway in human dopaminergic cells	Jiang G, Hu Y, Liu L, Cai J, Peng C, Li Q.	Neurochem Int.	2014 Sep	75:79-88.	x
24933638	Damage of neuroblastoma cell SH-SY5Y mediated by MPP+ inhibits proliferation of T-cell leukemia Jurkat by co-culture system	Wang F, Awan UF, Wang Y, Wang L, Qing H, Ma H, Deng Y.	Int J Mol Sci.	2014 Jun 13	15(6):10738-50.	x
24936070	The H50Q mutation enhances α-synuclein aggregation, secretion, and toxicity.	Khalaf O1, Fauvet B1, Oueslati A1, Dikiy I2, Mahul-Mellier AL1, Ruggeri FS3, Mbefo MK1, Vercruysse F1, Dietler G3, Lee SJ4, Eliezer D2, Lashuel HA5.	J Biol Chem.	2014 Aug 8	289(32):21856-76	x
24947832	Differential protein-protein interactions of LRRK1 and LRRK2 indicate roles in distinct cellular signaling pathways	Reyniers L, Del Giudice MG, Civiero L, Belluzzi E, Lobbestael E, Beilina A, Arrigoni G, Derua R, Waelkens E, Li Y, Crosio C, Iaccarino C, Cookson MR, Baekelandt V, Greggio E, Taymans JM.	J Neurochem.	2014 Oct	131(2):239-50.	Not PD specific
24959670	N-terminal truncated UCH-L1 prevents Parkinson's disease associated damage	Kim HJ, Kim HJ, Jeong JE, Baek JY, Jeong J, Kim S, Kim YM, Kim Y, Nam JH, Huh SH, Seo J, Jin BK, Lee KJ.	PLoS One.	2014	9(6):e99654.	x
24959672	Nrf2 signaling contributes to the neuroprotective effects of urate against 6-OHDA toxicity	Zhang N, Shu HY, Huang T, Zhang QL, Li D, Zhang GQ, Peng XY, Liu CF, Luo WF, Hu LF.	PLoS One.	2014	9(6):e100286.	x
24973649	Discovery of a benzofuran derivative (MBPTA) as a novel ROCK inhibitor that protects against MPPâº-induced oxidative stress and cell death in SH-SY5Y cells	Chong CM, Shen M, Zhou ZY, Pan P, Hoi PM, Li S, Liang W, Ai N, Zhang LQ, Li CW, Yu H, Hou T, Lee SM.	Free Radic Biol Med.	2014 Sep	74:283-93.	x
24993787	Novel LRRK2 GTP-binding inhibitors reduced degeneration in Parkinson's disease cell and mouse models	Li T, Yang D, Zhong S, Thomas JM, Xue F, Liu J, Kong L, Voulalas P, Hassan HE, Park JS, MacKerell AD Jr, Smith WW.	Hum Mol Genet.	2014 Dec 1	23(23):6212-22.	x
24997241	Intrastriatal GDNF gene transfer by inducible lentivirus vectors protects dopaminergic neurons in a rat model of parkinsonism.	Chen SS1, Yang C1, Hao F1, Li C1, Lu T1, Zhao LR2, Duan WM3.	Exp Neurol.	2014 Nov	261:87-96	x
24997245	Involvement of activation of the Nrf2/ARE pathway in protection against 6-OHDA-induced SH-SY5Y cell death by α-iso-cubebenol	Park SY, Kim do Y, Kang JK, Park G, Choi YW.	Neurotoxicology.	2014 Sep	44:160-8.	x
24998333	Altered dopamine homeostasis differentially affects mitochondrial voltage-dependent anion channels turnover	Alberio T, Mammucari C, D'Agostino G, Rizzuto R, Fasano M.	Biochim Biophys Acta.	2014 Sep	1842(9):1816-22.	x
25019626	Cell-permeable parkin proteins suppress Parkinson disease-associated phenotypes in cultured cells and animals	Duong T, Kim J, Ruley HE, Jo D.	PLoS One.	2014	9(7):e102517.	x
25029497	FBXO7 Y52C polymorphism as a potential protective factor in Parkinson's disease	Chen CM, Chen IC, Huang YC, Juan HF, Chen YL, Chen YC, Lin CH, Lee LC, Lee CM, Lee-Chen GJ, Lai YJ, Wu YR.	PLoS One.	2014	9(7):e101392.	x
25038418	Neuroprotection by Orexin-A via HIF-1α induction in a cellular model of Parkinson's disease	Feng Y, Liu T, Li XQ, Liu Y, Zhu XY, Jankovic J, Pan TH, Wu YC.	Neurosci Lett.	2014 Sep 5	579:35-40.	x
25046995	A cell culture model for monitoring α-synuclein cell-to-cell transfer.	Reyes JF1, Olsson TT2, Lamberts JT3, Devine MJ4, Kunath T5, Brundin P6.	Neurobiol Dis.	2015 May	77:266-75	Neuroblastoma, not SH-SY5Y
25054189	miR-16-1 promotes the aberrant α-synuclein accumulation in parkinson disease via targeting heat shock protein 70	Zhang Z, Cheng Y.	ScientificWorldJournal.	2014	2014:938348.	x
25072272	Brain-specific delivery of dopamine mediated by n,n-dimethyl amino group for the treatment of Parkinson's disease	Li Y, Zhou Y, Qi B, Gong T, Sun X, Fu Y, Zhang Z.	Mol Pharm.	2014 Sep 2	11(9):3174-85.	x
25078626	1,25-Dyhydroxyvitamin Dâ‚ƒ attenuates rotenone-induced neurotoxicity in SH-SY5Y cells through induction of autophagy	Jang W, Kim HJ, Li H, Jo KD, Lee MK, Song SH, Yang HO.	Biochem Biophys Res Commun.	2014 Aug 15	451(1):142-7.	x
25081478	Bioenergetic adaptation in response to autophagy regulators during rotenone exposure	Giordano S, Dodson M, Ravi S, Redmann M, Ouyang X, Darley Usmar VM, Zhang J.	J Neurochem.	2014 Dec	131(5):625-33.	SH-SY5Y used in previous studies
25087950	Antiinflammatory effects of orientin-2"-O-galactopyranoside on lipopolysaccharide-stimulated microglia.	Zhou X1, Gan P, Hao L, Tao L, Jia J, Gao B, Liu JY, Zheng LT, Zhen X.	Biol Pharm Bull.	2014	37(8):1282-94	Not PD specific
25092410	Developmental exposure to the organochlorine insecticide endosulfan damages the nigrostriatal dopamine system in male offspring.	Wilson WW1, Shapiro LP1, Bradner JM2, Caudle WM3.	Neurotoxicology.	2014 Sep	44:279-87	Neuroblastoma, not SH-SY5Y
25106480	BAG1 is neuroprotective in in vivo and in vitro models of Parkinson's disease	Kermer P, KÃhn A, Schnieder M, Lingor P, BÃ¤hr M, Liman J, Dohm CP.	J Mol Neurosci.	2015 Mar	55(3):587-95.	x
25108683	Upregulation of human PINK1 gene expression by NFÎºB signalling	Duan X, Tong J, Xu Q, Wu Y, Cai F, Li T, Song W.	Mol Brain.	2014 Aug 11	7:57.	x
25109238	Linking alpha-synuclein phosphorylation to reactive oxygen species formation and mitochondrial dysfunction in SH-SY5Y cells	Perfeito R, LÃ¡zaro DF, Outeiro TF, Rego AC.	Mol Cell Neurosci.	2014 Sep	62:51-9.	x
25112864	Systemic exosomal siRNA delivery reduced alpha-synuclein aggregates in brains of transgenic mice.	Cooper JM1, Wiklander PB, Nordin JZ, Al-Shawi R, Wood MJ, Vithlani M, Schapira AH, Simons JP, El-Andaloussi S, Alvarez-Erviti L.	Mov Disord.	2014 Oct	29(12):1476-85	x
25118928	The LRRK2 inhibitor GSK2578215A induces protective autophagy in SH-SY5Y cells: involvement of Drp-1-mediated mitochondrial fission and mitochondrial-derived ROS signaling	Saez-Atienzar S, Bonet-Ponce L, Blesa JR, Romero FJ, Murphy MP, Jordan J, Galindo MF.	Cell Death Dis.	2014 Aug 14	5:e1368.	x
25140899	Deciphering the glycolipid code of Alzheimer's and Parkinson's amyloid proteins allowed the creation of a universal ganglioside-binding peptide	Yahi N, Fantini J.	PLoS One.	2014	9(8):e104751.	x
25143804	Neuroprotective Effect of Chebulagic Acid via Autophagy Induction in SH-SY5Y Cells	Kim HJ, Kim J, Kang KS, Lee KT, Yang HO.	Biomol Ther (Seoul).	2014 Jul	22(4):275-81.	x
25175064	Gold drug auranofin could reduce neuroinflammation by inhibiting microglia cytotoxic secretions and primed respiratory burst	Madeira JM, Bajwa E, Stuart MJ, Hashioka S, Klegeris A.	J Neuroimmunol.	2014 Nov 15	276(1-2):71-9.	Not PD specific
25196484	Fiber-modified adenovirus for central nervous system Parkinson's disease gene therapy.	Lewis TB1, Glasgow JN2, Harms AS3, Standaert DG4, Curiel DT5.	Viruses.	2014 Aug 21	6(8):3293-310	x
25206503	Is X-linked methyl-CpG binding protein 2 a new target for the treatment of Parkinson's disease	Xie T, Zhang J, Yuan X, Yang J, Ding W, Huang X, Wu Y.	Neural Regen Res.	2013 Jul 25	8(21):1948-57.	x
25206648	Nanomolar concentration of alpha-synuclein enhances dopaminergic neuronal survival via Akt pathway	Kim JY, Jeon BS, Kim HJ, Ahn TB.	Neural Regen Res.	2013 Dec 15	8(35):3269-74.	x
25207598	Targeted suppression of chaperone-mediated autophagy by miR-320a promotes α-synuclein aggregation	Li G, Yang H, Zhu D, Huang H, Liu G, Lun P.	Int J Mol Sci.	2014 Sep 9	15(9):15845-57.	x
25218963	Puerarin protects dopaminergic neurons in Parkinson's disease models	Zhang X, Xiong J, Liu S, Wang L, Huang J, Liu L, Yang J, Zhang G, Guo K, Zhang Z, Wu P, Wang D, Lin Z, Xiong N, Wang T.	Neuroscience.	2014 Nov 7	280:88-98.	x
25220617	Protective role of olesoxime against wild-type α-synuclein-induced toxicity in human neuronally differentiated SHSY-5Y cells.	Gouarné C1, Tracz J, Paoli MG, Deluca V, Seimandi M, Tardif G, Xilouri M, Stefanis L, Bordet T, Pruss RM.	Br J Pharmacol.	2015 Jan	172(1):235-45	x
25232110	MicroRNA-7 protects against 1-methyl-4-phenylpyridinium-induced cell death by targeting RelA	Choi DC, Chae YJ, Kabaria S, Chaudhuri AD, Jain MR, Li H, Mouradian MM, Junn E.	J Neurosci.	2014 Sep 17	34(38):12725-37.	x
25234470	Neurotoxin-induced pathway perturbation in human neuroblastoma SH-EP cells.	Do JH1.	Mol Cells.	2014 Sep	37(9):672-84	Neuroblastoma, not SH-SY5Y
25242405	Detection of a novel neurotoxic metabolite of Parkinson's disease-related neurotoxin, 1-benzyl-1,2,3,4- tetrahydroisoquinoline	Kotake Y, Sekiya Y, Okuda K, Ohta S.	J Toxicol Sci.	2014	39(5):749-54.	SH-SY5Y used in previous studies
25261037	Zonisamide suppresses endoplasmic reticulum stress-induced neuronal cell damage in vitro and in vivo	Tsujii S, Ishisaka M, Shimazawa M, Hashizume T, Hara H.	Eur J Pharmacol.	2015 Jan 5	746:301-7.	x
25263579	Neuroprotective effects of aldehyde dehydrogenase 2 activation in rotenone-induced cellular and animal models of parkinsonism	Chiu CC, Yeh TH, Lai SC, Wu-Chou YH, Chen CH, Mochly-Rosen D, Huang YC, Chen YJ, Chen CL, Chang YM, Wang HL, Lu CS.	Exp Neurol.	2015 Jan	263:244-53.	x
25271104	Induction of Pi form of glutathione S-transferase by carnosic acid is mediated through PI3K/Akt/NF-ÎºB pathway and protects against neurotoxicity	Lin CY, Chen JH, Fu RH, Tsai CW.	Chem Res Toxicol.	2014 Nov 17	27(11):1958-66.	x
25274329	Methylglyoxal increases dopamine level and leads to oxidative stress in SH-SY5Y cells	Xie B, Lin F, Peng L, Ullah K, Wu H, Qing H, Deng Y.	Acta Biochim Biophys Sin (Shanghai).	2014 Nov	46(11):950-6.	x
25276829	Human umbilical cord mesenchymal stem cells infected with adenovirus expressing HGF promote regeneration of damaged neuron cells in a Parkinson's disease model.	Liu XS1, Li JF2, Wang SS1, Wang YT3, Zhang YZ2, Yin HL2, Geng S2, Gong HC2, Han B2, Wang YL2.	Biomed Res Int.	2014	2014:909657	x
25296989	Direct evidence of Parkinson pathology spread from the gastrointestinal tract to the brain in rats.	Holmqvist S1, Chutna O, Bousset L, Aldrin-Kirk P, Li W, Björklund T, Wang ZY, Roybon L, Melki R, Li JY.	Acta Neuropathol.	2014 Dec	128(6):805-20	x
25308934	Edible bird's nest ameliorates oxidative stress-induced apoptosis in SH-SY5Y human neuroblastoma cells	Yew MY, Koh RY, Chye SM, Othman I, Ng KY.	BMC Complement Altern Med.	2014 Oct 13	14:391.	x
25310737	The key role of sphingosine kinases in the molecular mechanism of neuronal cell survival and death in an experimental model of Parkinson's disease	Pyszko JA, Strosznajder JB.	Folia Neuropathol.	2014	52(3):260-9.	x
25310956	Guanosine protects glial cells against 6-hydroxydopamine toxicity	Giuliani P, Ballerini P, Buccella S, Ciccarelli R, Rathbone MP, Romano S, D'Alimonte I, Caciagli F, Di Iorio P, Pokorski M.	Adv Exp Med Biol.	2015	837:23-33.	SH-SY5Y used in previous studies
25319443	α-Synuclein-induced mitochondrial dysfunction in isolated preparation and intact cells: implications in the pathogenesis of Parkinson's disease.	Bir A1, Sen O, Anand S, Khemka VK, Banerjee P, Cappai R, Sahoo A, Chakrabarti S.	J Neurochem.	2014 Dec	131(6):868-77	x
25322130	Applications of digital holographic microscopy in therapeutic evaluation of Chinese herbal medicines	Wu CH, Lai XJ, Cheng CJ, Yu YC, Chang CY.	Appl Opt.	2014 Sep 20	53(27):G192-7.	Not PD specific
25322954	Protective effects of PEP-1-Catalase on stress-induced cellular toxicity and MPTP-induced Parkinson's disease	Eom SA, Kim DW, Shin MJ, Ahn EH, Chung SY, Sohn EJ, Jo HS, Jeon SJ, Kim DS, Kwon HY, Cho SW, Han KH, Park J, Eum WS, Choi SY.	BMB Rep.	2015 Jul	48(7):395-400.	x
25326789	Protective effects of poly (butyl) cyanoacrylate nanoparticles containing vasoactive intestinal peptide against 6-hydroxydopamine-induced neurotoxicity in vitro	Xu ZR, Wang WF, Liang XF, Liu ZH, Liu Y, Lin L, Zhu X.	J Mol Neurosci.	2015 Apr	55(4):854-64.	x
25338102	Identification of the PLK2-dependent phosphopeptidome by quantitative proteomics	Franchin C1, Cesaro L2, Pinna LA3, Arrigoni G1, Salvi M2.	PLoS One.	2014 Oct 22	9(10):e111018	Not PD specific
25343141	The Parkinson's Disease-Associated Protein α-Synuclein Disrupts Stress Signaling - A Possible Implication for Methamphetamine Use?	Wang S1, Witt SN2.	Microb Cell.	2014 Apr	1(4):131-132	Review
25355370	Evaluation of levodopa and carbidopa antioxidant activity in normal human lymphocytes in vitro: implication for oxidative stress in Parkinson's disease.	Colamartino M1, Santoro M, Duranti G, Sabatini S, Ceci R, Testa A, Padua L, Cozzi R.	Neurotox Res.	2015 Feb	27(2):106-17	Neuroblastoma used on other studies
25377066	Pinocembrin attenuates 6-OHDA-induced neuronal cell death through Nrf2/ARE pathway in SH-SY5Y cells	Jin X, Liu Q, Jia L, Li M, Wang X.	Cell Mol Neurobiol.	2015 Apr	35(3):323-33.	x
25425650	Acceleration of α-synuclein aggregation by exosomes.	Grey M1, Dunning CJ2, Gaspar R3, Grey C4, Brundin P5, Sparr E6, Linse S7.	J Biol Chem.	2015 Jan 30	290(5):2969-82	Neuroblastoma, not SH-SY5Y
25446857	Carnosic acid protects against 6-hydroxydopamine-induced neurotoxicity in in vivo and in vitro model of Parkinson's disease: involvement of antioxidative enzymes induction	Wu CR, Tsai CW, Chang SW, Lin CY, Huang LC, Tsai CW.	Chem Biol Interact.	2015 Jan 5	225:40-6.	x
25449120	Dimethyl fumarate attenuates 6-OHDA-induced neurotoxicity in SH-SY5Y cells and in animal model of Parkinson's disease by enhancing Nrf2 activity	Jing X, Shi H, Zhang C, Ren M, Han M, Wei X, Zhang X, Lou H.	Neuroscience.	2015 Feb 12	286:131-40.	x
25452767	Evaluating the relationship between amyloid-β and α-synuclein phosphorylated at Ser129 in dementia with Lewy bodies and Parkinson's disease	Swirski M, Miners JS, de Silva R, Lashley T, Ling H, Holton J, Revesz T, Love S.	Alzheimers Res Ther.	2014	6(5-8):77.	x
25455499	Synthesis and structure-activity relationships study of dithiolethiones as inducers of glutathione in the SH-SY5Y neuroblastoma cell line	Brown DA, Betharia S, Yen JH, Tran Q, Mistry H, Smith K.	Bioorg Med Chem Lett.	2014 Dec 15	24(24):5829-31.	x
25467131	MS-275 inhibits aroclor 1254-induced SH-SY5Y neuronal cell toxicity by preventing the formation of the HDAC3/REST complex on the synapsin-1 promoter	Formisano L, Guida N, Laudati G, Mascolo L, Di Renzo G, Canzoniero LM.	J Pharmacol Exp Ther.	2015 Feb	352(2):236-43.	Not PD specific
25469469	Induction of GADD45α protects M17 neuroblastoma cells against MPP*.	Wang XF1, Zeng QG, Zeng Y, Man RY, Lu BX, Luo YF.	IUBMB Life.	2014 Nov	66(11):786-92	Neuroblastoma, not SH-SY5Y
25481834	TNF-α regulates miRNA targeting mitochondrial complex-I and induces cell death in dopaminergic cells	Prajapati P, Sripada L, Singh K, Bhatelia K, Singh R, Singh R.	Biochim Biophys Acta.	2015 Mar	1852(3):451-61.	x
25487308	Isoflavones with neuroprotective activities from fruits of Cudrania tricuspidata	Hiep NT, Kwon J, Kim DW, Hwang BY, Lee HJ, Mar W, Lee D.	Phytochemistry.	2015 Mar	111:141-8.	x
25489126	Imaging of complications from hematopoietic stem cell transplant.	Pandey T1, Maximin S2, Bhargava P2.	Indian J Radiol Imaging.	2014 Oct	24(4):327-38	Not PD specific
25497688	Overexpression of alpha-synuclein at non-toxic levels increases dopaminergic cell death induced by copper exposure via modulation of protein degradation pathways.	Anandhan A1, Rodriguez-Rocha H1, Bohovych I2, Griggs AM3, Zavala-Flores L1, Reyes-Reyes EM4, Seravalli J5, Stanciu LA6, Lee J5, Rochet JC3, Khalimonchuk O5, Franco R7.	Neurobiol Dis.	2015 Sep	81:76-92	Neuroblastoma, not SH-SY5Y
25528190	Systems genomics evaluation of the SH-SY5Y neuroblastoma cell line as a model for Parkinson's disease	Krishna A, Biryukov M, Trefois C, Antony PM, Hussong R, Lin J, HeinÃ¤niemi M, Glusman G, KÃglsberger S, Boyd O, van den Berg BH, Linke D, Huang D, Wang K, Hood L, Tholey A, Schneider R, Galas DJ, Balling R, May P.	BMC Genomics.	2014 Dec 20	15:1154.	x
25530618	P2X and P2Y receptors—role in the pathophysiology of the nervous system.	Puchałowicz K1, Tarnowski M2, Baranowska-Bosiacka I3, Chlubek D4, Dziedziejko V5.	Int J Mol Sci.	2014 Dec 18	15(12):23672-704	Review
25541488	Inhibition of miR-34b and miR-34c enhances α-synuclein expression in Parkinson's disease	Kabaria S, Choi DC, Chaudhuri AD, Mouradian MM, Junn E.	FEBS Lett.	2015 Jan 30	589(3):319-25.	x
25548536	ATP13A2/PARK9 Deficiency Neither Cause Lysosomal Impairment Nor Alter α-Synuclein Metabolism in SH-SY5Y Cells	Bae EJ, Lee C, Lee HJ, Kim S, Lee SJ.	Exp Neurobiol.	2014 Dec	23(4):365-71.	x
25555914	Prolyl oligopeptidase enhances α-synuclein dimerization via direct protein-protein interaction.	Savolainen MH1, Yan X2, Myöhänen TT1, Huttunen HJ3.	J Biol Chem.	2015 Feb 20	290(8):5117-26	Neuroblastoma, not SH-SY5Y
25561023	Molecular determinants of α-synuclein mutants' oligomerization and membrane interactions.	Tsigelny IF1, Sharikov Y1, Kouznetsova VL1, Greenberg JP1, Wrasidlo W1, Overk C1, Gonzalez T1, Trejo M1, Spencer B1, Kosberg K1, Masliah E1.	ACS Chem Neurosci.	2015 Mar 18	6(3):403-16	Neuroblastoma, not SH-SY5Y
25575680	Fenpropathrin, a Widely Used Pesticide, Causes Dopaminergic Degeneration	Xiong J, Zhang X, Huang J, Chen C, Chen Z, Liu L, Zhang G, Yang J, Zhang Z, Zhang Z, Lin Z, Xiong N, Wang T.	Mol Neurobiol.	2016 Mar	53(2):995-1008.	x
25588864	Autophagy inhibition by caffeine increases toxicity of methamphetamine in SH-SY5Y neuroblastoma cell line	Pitaksalee R, Sanvarinda Y, Sinchai T, Sanvarinda P, Thampithak A, Jantaratnotai N, Jariyawat S, Tuchinda P, Govitrapong P, Sanvarinda P.	Neurotox Res.	2015 May	27(4):421-9.	x
25602932	Synthesis and pharmacological evaluation of benzannulated derivatives as potent and selective sigma-1 protein ligands.	Donnier-Maréchal M1, Carato P2, Le Broc D3, Furman C4, Melnyk P5.	Eur J Med Chem.	2015 Mar 6	92:575-82	Not PD specific
25617759	New roles of glycosaminoglycans in α-synuclein aggregation in a cellular model of Parkinson disease.	Lehri-Boufala S1, Ouidja MO1, Barbier-Chassefière V1, Hénault E1, Raisman-Vozari R2, Garrigue-Antar L1, Papy-Garcia D1, Morin C1.	PLoS One.	2015 Jan 24	10(1):e0116641	x
25633675	Centella asiatica Attenuates Amyloid-β-Induced Oxidative Stress and Mitochondrial Dysfunction	Gray NE, Sampath H, Zweig JA, Quinn JF, Soumyanath A.	J Alzheimers Dis.	2015	45(3):933-46.	Not PD specific
25637286	LAMP-2 deficiency leads to hippocampal dysfunction but normal clearance of neuronal substrates of chaperone-mediated autophagy in a mouse model for Danon disease.	Rothaug M, Stroobants S, Schweizer M, Peters J, Zunke F, Allerding M, D'Hooge R, Saftig P, Blanz J.	Acta Neuropathol Commun.	2015 Jan 31	3:6	Not PD specific
25662902	CHCHD2 mutations in autosomal dominant late-onset Parkinson's disease: a genome-wide linkage and sequencing study	Funayama M, Ohe K, Amo T, Furuya N, Yamaguchi J, Saiki S, Li Y, Ogaki K, Ando M, Yoshino H, Tomiyama H, Nishioka K, Hasegawa K, Saiki H, Satake W, Mogushi K, Sasaki R, Kokubo Y, Kuzuhara S, Toda T, Mizuno Y, Uchiyama Y, et al.	Lancet Neurol.	2015 Mar	14(3):274-82.	Use of SH-SY5Y to analyze splicing
25665531	Involvement of mortalin/GRP75/mthsp70 in the mitochondrial impairments induced by A53T mutant α-synuclein	Liu FT, Chen Y, Yang YJ, Yang L, Yu M, Zhao J, Wu JJ, Huang F, Liu W, Ding ZT, Wang J.	Brain Res.	2015 Apr 16	1604:52-61.	x
25671100	Modulation of tau phosphorylation by environmental copper.	Voss K1, Harris C1, Ralle M2, Duffy M2, Murchison C1, Quinn JF3.	Transl Neurodegener.	2014 Nov 17	3(1):24	Not PD specific
25675097	The S-nitrosylation status of PCNA localized in cytosol impacts the apoptotic pathway in a Parkinson's disease paradigm	Yin L, Xie Y, Yin S, Lv X, Zhang J, Gu Z, Sun H, Liu S.	PLoS One.	2015	10(2):e0117546.	x
25680233	Neuroprotective effects of 5-(4-hydroxy-3-dimethoxybenzylidene)-thiazolidinone in MPTP induced Parkinsonism model in mice.	Ren Z1, Yang N1, Ji C1, Zheng J1, Wang T1, Liu Y2, Zuo P3.	Neuropharmacology.	2015 Jun	93:209-18	Neuroblastoma, not SH-SY5Y
25681212	Loss of lysosome-associated membrane protein 3 (LAMP3) enhances cellular vulnerability against proteasomal inhibition	Dominguez-Bautista JA, Klinkenberg M, Brehm N, Subramaniam M, Kern B, Roeper J, Auburger G, Jendrach M.	Eur J Cell Biol.	2015 Mar-Apr	94(3-4):148-61.	x
25686659	Human antimicrobial peptide LL-37 induces glial-mediated neuroinflammation	Lee M, Shi X, Barron AE, McGeer E, McGeer PL.	Biochem Pharmacol.	2015 Mar 15	94(2):130-41.	Not PD specific
25689131	Chemogenomic profiling of endogenous PARK2 expression using a genome-edited coincidence reporter.	Hasson SA1, Fogel AI1, Wang C1, MacArthur R2, Guha R2, Heman-Ackah S3, Martin S2, Youle RJ1, Inglese J2,4.	ACS Chem Biol.	2015 May 15	10(5):1188-97	Neuroblastoma, not SH-SY5Y
25689470	Targeting cyclin D3/CDK6 activity for treatment of Parkinson's disease	AlquÃ©zar C, Barrio E, Esteras N, de la EncarnaciÃ³n A, BartolomÃ© F, Molina JA, MartÃ­n-Requero Ã.	J Neurochem.	2015 Jun	133(6):886-97.	x
25692332	Neurocytoprotective Effects of Aliphatic Hydroxamates from Lovastatin, a Secondary Metabolite from Monascus-Fermented Red Mold Rice, in 6-Hydroxydopamine (6-OHDA)-Treated Nerve Growth Factor (NGF)-Differentiated PC12 Cells.	Lin CM1,2,3, Lin YT4, Lin RD5, Huang WJ4,6,7, Lee MH4,6.	ACS Chem Neurosci.	2015 May 20	6(5):716-24	Neuroblastoma, not SH-SY5Y
25693864	Diquat causes caspase-independent cell death in SH-SY5Y cells by production of ROS independently of mitochondria	Nisar R, Hanson PS, He L, Taylor RW, Blain PG, Morris CM.	Arch Toxicol.	2015 Oct	89(10):1811-25.	x
25698928	Systems biology analysis of the proteomic alterations induced by MPP(+), a Parkinson's disease-related mitochondrial toxin	Monti C, Bondi H, Urbani A, Fasano M, Alberio T.	Front Cell Neurosci.	2015	9:14.	x
25701590	Insight into conformational modification of alpha-synuclein in the presence of neuronal whole cells and of their isolated membranes	Smaldone G, Diana D, Pollegioni L, Di Gaetano S, Fattorusso R, Pedone E.	FEBS Lett.	2015 Mar 24	589(7):798-804.	Not use of SH-SY5Y as a cell model
25720411	Loss of TDP-43 Inhibits Amyotrophic Lateral Sclerosis-Linked Mutant SOD1 Aggresome Formation in an HDAC6-Dependent Manner.	Xia Q1, Wang H, Zhang Y, Ying Z, Wang G.	J Alzheimers Dis.	2015	45(2):373-86	Not PD specific
25744031	A newly discovered neurotoxin ADTIQ associated with hyperglycemia and Parkinson's disease	Xie B, Lin F, Ullah K, Peng L, Ding W, Dai R, Qing H, Deng Y.	Biochem Biophys Res Commun.	2015 Apr 10	459(3):361-6.	x
25765352	Design, synthesis and evaluation of a series of non-steroidal anti-inflammatory drug conjugates as novel neuroinflammatory inhibitors.	Xu Z1, Wu J1, Zheng J1, Ma H1, Zhang H1, Zhen X1, Zheng LT2, Zhang X3.	Int Immunopharmacol.	2015 Apr	25(2):528-37	Not PD specific
25769802	Neuroprotective role of sphingosine-1-phosphate in L-BMAA treated neuroblastoma cells (SH-SY5Y)	MuÃ±oz-SÃ¡ez E, de Munck GarcÃ­a E, Arahuetes Portero RM, Vicente F, Ortiz-LÃ³pez FJ, Cantizani J, GÃ³mez Miguel B.	Neurosci Lett.	2015 Apr 23	593:83-9.	x
25770828	Discovery of novel anti-parkinsonian effect of schisantherin A in in vitro and in vivo	Sa F, Zhang LQ, Chong CM, Guo BJ, Li S, Zhang ZJ, Zheng Y, Hoi PM, Lee SM.	Neurosci Lett.	2015 Apr 23	593:7-12.	x
25773262	Salsolinol Damaged Neuroblastoma SH-SY5Y Cells Induce Proliferation of Human Monocyte THP-1 Cells Through the mTOR Pathway in a Co-culture System	Wang F, Ni J, Wang X, Xie B, Feng C, Zhao S, Saeed Y, Qing H, Deng Y.	Neurochem Res.	2015 May	40(5):932-41.	x
25784353	Structure based aggregation studies reveal the presence of helix-rich intermediate during α-Synuclein aggregation.	Ghosh D1, Singh PK1, Sahay S1, Jha NN1, Jacob RS1, Sen S1, Kumar A1, Riek R2, Maji SK1.	Sci Rep.	2015 Mar 18	5:9228	x
25800307	The protein l-isoaspartyl (d-aspartyl) methyltransferase protects against dopamine-induced apoptosis in neuroblastoma SH-SY5Y cells	Ouazia D, Levros LC Jr, Rassart Ã‰, Desrosiers RR.	Neuroscience.	2015 Jun 4	295:139-50.	x
25813221	Loss of glucocerebrosidase 1 activity causes lysosomal dysfunction and α-synuclein aggregation.	Bae EJ1, Yang NY1, Lee C2, Lee HJ2, Kim S3, Sardi SP4, Lee SJ5.	Exp Mol Med.	2015 Mar 27	47:e153	x
25814668	MicroRNA-7 Promotes Glycolysis to Protect against 1-Methyl-4-phenylpyridinium-induced Cell Death	Chaudhuri AD, Kabaria S, Choi DC, Mouradian MM, Junn E.	J Biol Chem.	2015 May 8	290(19):12425-34.	x
25816252	A novel GTP-binding inhibitor, FX2149, attenuates LRRK2 toxicity in Parkinson's disease models	Li T, He X, Thomas JM, Yang D, Zhong S, Xue F, Smith WW.	PLoS One.	2015	10(3):e0122461.	x
25825522	Serum- and Glucocorticoid-Inducible Kinase 1 Confers Protection in Cell-Based and in In Vivo Neurotoxin Models via the c-Jun N-Terminal Kinase Signaling Pathway	Iqbal S, Howard S, LoGrasso PV.	Mol Cell Biol.	2015 Jun 1	35(11):1992-2006.	x
25825926	Trans-blood brain barrier delivery of dopamine-loaded nanoparticles reverses functional deficits in parkinsonian rats	Pahuja R, Seth K, Shukla A, Shukla RK, Bhatnagar P, Chauhan LK, Saxena PN, Arun J, Chaudhari BP, Patel DK, Singh SP, Shukla R, Khanna VK, Kumar P, Chaturvedi RK, Gupta KC.	ACS Nano.	2015 May 26	9(5):4850-71.	x
25862939	Increased 14-3-3 phosphorylation observed in Parkinson's disease reduces neuroprotective potential of 14-3-3 proteins.	Slone SR1, Lavalley N1, McFerrin M1, Wang B1, Yacoubian TA2.	Neurobiol Dis.	2015 Jul	79:1-13	x
25865804	Linking a compound-heterozygous Parkin mutant (Q311R and A371T) to Parkinson's disease by using proteomic and molecular approaches	Ozgul S, Kasap M, Akpinar G, Kanli A, GÃ¼zel N, Karaosmanoglu K, Baykal AT, Iseri P.	Neurochem Int.	2015 Jun-Jul	85-86:1-13.	x
25956828	In vivo protein targets for increased quinoprotein adduct formation in aged substantia nigra.	Yu G1, Liu H2, Zhou W2, Zhu X2, Yu C2, Wang N2, Zhang Y2, Ma J2, Zhao Y2, Xu Y2, Liao L3, Ji H4, Yuan C2, Ma J5.	Exp Neurol.	2015 Sep	271:13-24	x
25963095	Dyrk1A phosphorylates parkin at Ser-131 and negatively regulates its ubiquitin E3 ligase activity	Im E, Chung KC.	J Neurochem.	2015 Aug	134(4):756-68.	x
25976060	MiR-124 Regulates Apoptosis and Autophagy Process in MPTP Model of Parkinson's Disease by Targeting to Bim	Wang H, Ye Y, Zhu Z, Mo L, Lin C, Wang Q, Wang H, Gong X, He X, Lu G, Lu F, Zhang S.	Brain Pathol.	2016 Mar	26(2):167-76.	x
25976369	Neuroprotective Effect of JZL184 in MPP(+)-Treated SH-SY5Y Cells Through CB2 Receptors	Aymerich MS, Rojo-Bustamante E, Molina C, Celorrio M, SÃ¡nchez-Arias JA, Franco R.	Mol Neurobiol.	2016 May	53(4):2312-9.	x
25983327	Regulation of basal autophagy by transient receptor potential melastatin 7 (TRPM7) channel	Oh HG, Chun YS, Park CS, Kim TW, Park MK, Chung S.	Biochem Biophys Res Commun.	2015 Jul 17-24	463(1-2):7-12.	x
25991017	Rotenone affects p53 transcriptional activity and apoptosis via targeting SIRT1 and H3K9 acetylation in SH-SY5Y cells	Feng Y, Liu T, Dong SY, Guo YJ, Jankovic J, Xu H, Wu YC.	J Neurochem.	2015 Aug	134(4):668-76.	x
25994206	Neuroprotective effects of Eucommia ulmoides Oliv. and its bioactive constituent work via ameliorating the ubiquitin-proteasome system	Guo H, Shi F, Li M, Liu Q, Yu B, Hu L.	BMC Complement Altern Med.	2015 May 21	15:151.	x
26006268	Characterizations of a synthetic pituitary adenylate cyclase-activating polypeptide analog displaying potent neuroprotective activity and reduced inÂ vivo cardiovascular side effects in a Parkinson's disease model	Lamine A, LÃ©tourneau M, Doan ND, Maucotel J, Couvineau A, Vaudry H, Chatenet D, Vaudry D, Fournier A.	Neuropharmacology.	2015 May 22		x
26022510	Serum-free culture alters the quantity and protein composition of neuroblastoma-derived extracellular vesicles.	Li J1, Lee Y1, Johansson HJ2, Mäger I1,3, Vader P1,4, Nordin JZ5, Wiklander OP5, Lehtiö J2, Wood MJ6, Andaloussi SE1,5.	J Extracell Vesicles.	2015 May 27	4:26883	Not PD specific
26074776	Lithium protects against paraquat neurotoxicity by NRF2 activation and miR-34a inhibition in SH-SY5Y cells	Alural B, Ozerdem A, Allmer J, Genc K, Genc S.	Front Cell Neurosci.	2015	9:209.	x
26085927	Wnt3a protects SH-SY5Y cells against 6-hydroxydopamine toxicity by restoration of mitochondria function	Wei L, Ding L, Mo MS, Lei M, Zhang L, Chen K, Xu P.	Transl Neurodegener.	2015	4:11.	x
26094622	2, 2'- and 4, 4'-Cyanines are transporter-independent in vitro dopaminergic toxins with the specificity and mechanism of toxicity similar to MPPâº	Kadigamuwa CC, Le VQ, Wimalasena K.	J Neurochem.	2015 Nov	135(4):755-67.	x
26099628	Nigral overexpression of alpha-synuclein in the absence of parkin enhances alpha-synuclein phosphorylation but does not modulate dopaminergic neurodegeneration.	Van Rompuy AS1, Oliveras-Salvá M2, Van der Perren A3, Corti O4,5,6, Van den Haute C7,8, Baekelandt V9.	Mol Neurodegener.	2015 Jun 23	10:23	x
26102036	MTERF4 regulates the mitochondrial dysfunction induced by MPP(+) inÂ SH-SY5Y cells	Ye X, Han Y, Zhang L, Liu W, Zuo J.	Biochem Biophys Res Commun.	2015 Aug 14	464(1):214-20.	x
26114390	Ginsenoside Rd Protects SH-SY5Y Cells against 1-Methyl-4-phenylpyridinium Induced Injury	Liu Y, Zhang RY, Zhao J, Dong Z, Feng DY, Wu R, Shi M, Zhao G.	Int J Mol Sci.	2015 Jun 24	16(7):14395-408.	x
26116522	Tanshinone IIA protects dopaminergic neurons against 6-hydroxydopamine-induced neurotoxicity through miR-153/NF-E2-related factor 2/antioxidant response element signaling pathway	Zhang XS, Ha S, Wang XL, Shi YL, Duan SS, Li ZA.	Neuroscience.	2015 Sep 10	303:489-502.	x
26117230	Transduced PEP-1-PON1 proteins regulate microglial activation and dopaminergic neuronal death in a Parkinson's disease model	Kim MJ, Park M, Kim DW, Shin MJ, Son O, Jo HS, Yeo HJ, Cho SB, Park JH, Lee CH, Kim DS, Kwon OS, Kim J, Han KH, Park J, Eum WS, Choi SY.	Biomaterials.	2015 Sep	64:45-56.	x
26122121	Signal transducer and activator of transcription 2 deficiency is a novel disorder of mitochondrial fission.	Shahni R1, Cale CM2, Anderson G3, Osellame LD4, Hambleton S5, Jacques TS6, Wedatilake Y7, Taanman JW8, Chan E2, Qasim W2, Plagnol V9, Chalasani A10, Duchen MR11, Gilmour KC2, Rahman S12.	Brain.	2015 Oct	138(Pt 10):2834-46	Not PD specific
26135068	Heat shock protein 70 induction by glutamine increases the α-synuclein degradation in SH-SY5Y neuroblastoma cells	Yang J, Zhang Y, Zhao S, Zhang Z, Tong X, Wei F, Lu Z.	Mol Med Rep.	2015 Oct	12(4):5524-30.	Not accessible
26138444	Fibril growth and seeding capacity play key roles in α-synuclein-mediated apoptotic cell death.	Mahul-Mellier AL1, Vercruysse F1, Maco B1, Ait-Bouziad N1, De Roo M2, Muller D2, Lashuel HA1.	Cell Death Differ.	2015 Dec	22(12):2107-22	x
26141122	Overexpression of PGC-1α Influences Mitochondrial Signal Transduction of Dopaminergic Neurons	Ye Q, Huang W, Li D, Si E, Wang J, Wang Y, Chen C, Chen X.	Mol Neurobiol.	2015 Jul 4.		x
26156288	The Neuroprotective Effect of Erythropoietin on Rotenone-Induced Neurotoxicity in SH-SY5Y Cells Through the Induction of Autophagy	Jang W, Kim HJ, Li H, Jo KD, Lee MK, Yang HO.	Mol Neurobiol.	2015 Jul 9.		x
26164453	Biochemical protective effect of 1,25-dihydroxyvitamin D3 through autophagy induction in the MPTP mouse model of Parkinson's disease	Li H, Jang W, Kim HJ, Jo KD, Lee MK, Song SH, Yang HO.	Neuroreport.	2015 Aug 19	26(12):669-74.	SH-SY5Y used in previous studies
26164594	Neuroprotective effects of Kukoamine B against hydrogen peroxide-induced apoptosis and potential mechanisms in SH-SY5Y cells	Hu XL, Niu YX, Zhang Q, Tian X, Gao LY, Guo LP, Meng WH, Zhao QC.	Environ Toxicol Pharmacol.	2015 Jul	40(1):230-40.	Not PD specific
26183158	Identification of ULK1 as a novel biomarker involved in miR-4487 and miR-595 regulation in neuroblastoma SH-SY5Y cell autophagy	Chen Y, Wang S, Zhang L, Xie T, Song S, Huang J, Zhang Y, Ouyang L, Liu B.	Sci Rep.	2015 Jul 17	5:11035.	x
26188143	NRSF is an essential mediator for the neuroprotection of trichostatin A in the MPTP mouse model of Parkinson's disease	Suo H, Wang P, Tong J, Cai L, Liu J, Huang D, Huang L, Wang Z, Huang Y, Xu J, Ma Y, Yu M, Fei J, Huang F.	Neuropharmacology.	2015 Dec	99:67-78.	x
26215270	Antimicrobial Peptide, Lumbricusin, Ameliorates Motor Dysfunction and Dopaminergic Neurodegeneration in a Mouse Model of Parkinson's Disease	Kim DH, Lee IH, Nam ST, Hong J, Zhang P, Lu LF, Hwang JS, Park KC, Kim H.	J Microbiol Biotechnol.	2015 Oct 28	25(10):1640-7.	SH-SY5Y used in previous studies
26223801	Extremely Low Frequency Magnetic Field (ELF-MF) Exposure Sensitizes SH-SY5Y Cells to the Pro-Parkinson's Disease Toxin MPP(.)	Benassi B, Filomeni G, Montagna C, Merla C, Lopresto V, Pinto R, Marino C, Consales C.	Mol Neurobiol.	2015 Jul 30.		x
26232623	Edaravone leads to proteome changes indicative of neuronal cell protection in response to oxidative stress	Jami MS, Salehi-Najafabadi Z, Ahmadinejad F, Hoedt E, Chaleshtori MH, Ghatrehsamani M, Neubert TA, Larsen JP, MÃ¸ller SG.	Neurochem Int.	2015 Nov	90:134-41.	x
26242194	Tricyclic Antidepressants Amitriptyline and Desipramine Induced Neurotoxicity Associated with Parkinson's Disease	Lee MY, Hong S, Kim N, Shin KS, Kang SJ.	Mol Cells.	2015 Aug	38(8):734-40.	x
26264181	Myeloid cell leukemia 1 (Mcl(-1)) protects against 1-methyl-4-phenylpyridinium ion (MPP+) induced apoptosis in Parkinson's disease	Fan L, Jiang L, Du Z.	Metab Brain Dis.	2015 Oct	30(5):1269-74.	x
26264395	Suppression effects of O-demethyldemethoxycurcumin on thapsigargin triggered on endoplasmic reticulum stress in SK-N-SH cells.	Janyou A1, Changtam C2, Suksamrarn A3, Tocharus C1, Tocharus J4.	Neurotoxicology.	2015 Sep	50:92-100	Not PD specific
26268594	LRRK2 Facilitates tau Phosphorylation through Strong Interaction with tau and cdk5	Shanley MR, Hawley D, Leung S, Zaidi NF, Dave R, Schlosser KA, Bandopadhyay R, Gerber SA, Liu M.	Biochemistry.	2015 Aug 25	54(33):5198-208.	x
26276080	Pyrroloquinoline quinone-conferred neuroprotection in rotenone models of Parkinson's disease	Qin J, Wu M, Yu S, Gao X, Zhang J, Dong X, Ji J, Zhang Y, Zhou L, Zhang Q, Ding F.	Toxicol Lett.	2015 Nov 4	238(3):70-82.	x
26279968	Expression of synaptophysin protein in different dopaminergic cell lines	Bai X, Strong R.	J Biochem Pharmacol Res.	2014 Dec	2(4):185-190.	Not PD specific
26282218	Schisandrin B shows neuroprotective effect in 6-OHDA-induced Parkinson's disease via inhibiting the negative modulation of miR-34a on Nrf2 pathway	Ba Q, Cui C, Wen L, Feng S, Zhou J, Yang K.	Biomed Pharmacother.	2015 Oct	75:165-72.	x
26284039	DJ1 expression downregulates in neuroblastoma cells (SK-N-MC) chronically exposed to HIV-1 and cocaine.	Roy U1, Atluri VS1, Agudelo M1, Yndart A1, Huang Z1, Nair M1.	Front Microbiol.	2015 Jul 28	6:749	Not PD specific
26287258	Toxic Oligomeric Alpha-Synuclein Variants Present in Human Parkinson's Disease Brains Are Differentially Generated in Mammalian Cell Models	Xin W, Emadi S, Williams S, Liu Q, Schulz P, He P, Alam NB, Wu J, Sierks MR.	Biomolecules.	2015 Jul 22	5(3):1634-51.	x
26295827	The Association of Palmitoylethanolamide with Luteolin Decreases Neuroinflammation and Stimulates Autophagy in Parkinson's Disease Model	Siracusa R, Paterniti I, Impellizzeri D, Cordaro M, Crupi R, Navarra M, Cuzzocrea S, Esposito E.	CNS Neurol Disord Drug Targets.	2015	14(10):1350-65.	Not accessible
26295830	PAX6 expression may be protective against dopaminergic cell loss in Parkinson's disease	Thomas MG, Welch C, Stone L, Allan P, Barker RA, White RB.	CNS Neurol Disord Drug Targets.	2016	15(1):73-9.	x
26295831	Novel Lactulose and Melibiose Targeting Autophagy to Reduce PolyQ Aggregation in Cell Models of Spinocerebellar Ataxia 3	Lin CH, Wu YR, Yang JM, Chen WL, Chao CY, Chen IC, Lin TH, Wu YC, Hsu KC, Chen CM, Lee GC, Hsieh-Li HM, Lee CM, Lee-Chen GJ.	CNS Neurol Disord Drug Targets.	2016	15(3):351-9.	Not PD specific
26306821	Rapamycin improves motor function, reduces 4-hydroxynonenal adducted protein in brain, and attenuates synaptic injury in a mouse model of synucleinopathy	Bai X, Wey MC, Fernandez E, Hart MJ, Gelfond J, Bokov AF, Rani S, Strong R.	Pathobiol Aging Age Relat Dis.	2015	5:28743.	x
26345577	Aminochrome Toxicity is Mediated by Inhibition of Microtubules Polymerization Through the Formation of Adducts with Tubulin	BriceÃ±o A, MuÃ±oz P, Brito P, Huenchuguala S, Segura-Aguilar J, Paris IB.	Neurotox Res.	2016 Apr	29(3):381-93.	x
26346882	Agmatine Protects Against 6-OHDA-Induced Apoptosis, and ERK and Akt/GSK Disruption in SH-SY5Y Cells	Amiri E, Ghasemi R, Moosavi M.	Cell Mol Neurobiol.	2015 Sep 7		x
26349993	MicroRNA-214 participates in the neuroprotective effect of Resveratrol via inhibiting α-synuclein expression in MPTP-induced Parkinson's disease mouse	Wang ZH, Zhang JL, Duan YL, Zhang QS, Li GF, Zheng DL.	Biomed Pharmacother.	2015 Aug	74:252-6.	x
26357513	Neuroprotective Effects of Alpha-Mangostin on MPP(+)-Induced Apoptotic Cell Death in Neuroblastoma SH-SY5Y Cells	Janhom P, Dharmasaroja P.	J Toxicol.	2015	2015:919058.	x
26361721	Nootropic potential of Ashwagandha leaves: Beyond traditional root extracts.	Wadhwa R1, Konar A1, Kaul SC2.	Neurochem Int.	2016 May	95:109-18	Not PD specific
26364587	The Neuroprotective Role of Insulin Against MPP(+) -Induced Parkinson's Disease in Differentiated SH-SY5Y Cells	Ramalingam M, Kim SJ.	J Cell Biochem.	2016 Apr	117(4):917-26.	x
26364802	Parkin represses 6-hydroxydopamine-induced apoptosis via stabilizing scaffold protein p62 in PC12 cells	Hou XO, Si JM, Ren HG, Chen D, Wang HF, Ying Z, Hu QS, Gao F, Wang GH.	Acta Pharmacol Sin.	2015 Nov	36(11):1300-7.	x
26378614	GBA deficiency promotes SNCA/α-synuclein accumulation through autophagic inhibition by inactivated PPP2A.	Du TT1,2, Wang L1, Duan CL1, Lu LL1, Zhang JL1, Gao G1, Qiu XB2, Wang XM1, Yang H1.	Autophagy.	2015	11(10):1803-20	Neuroblastoma, not SH-SY5Y
26384650	Leucine-Rich Repeat Kinase 2 (LRRK2) phosphorylates p53 and induces p21(WAF1/CIP1) expression	Ho DH, Kim H, Kim J, Sim H, Ahn H, Kim J, Seo H, Chung KC, Park BJ, Son I, Seol W.	Mol Brain.	2015 Sep 18	8:54.	x
26393562	Effect of Amaranthus on Advanced Glycation End-Products Induced Cytotoxicity and Proinflammatory Cytokine Gene Expression in SH-SY5Y Cells	Amornrit W, Santiyanont R.	Molecules.	2015 Sep 18	20(9):17288-308.	Not PD specific
26397162	Intracellular distribution of fluorescent copper and zinc bis(thiosemicarbazonato) complexes measured with fluorescence lifetime spectroscopy.	Hickey JL, James JL1, Henderson CA, Price KA1, Mot AI1, Buncic G, Crouch PJ1, White JM, White AR1, Smith TA, Donnelly PS.	Inorg Chem.	2015 Oct 5	54(19):9556-67	Not PD specific
26405034	The Protein Complex of Neurodegeneration-related Phosphoinositide Phosphatase Sac3 and ArPIKfyve Binds the Lewy Body-associated Synphilin-1, Preventing Its Aggregation	Ikonomov OC, Sbrissa D, Compton LM, Kumar R, Tisdale EJ, Chen X, Shisheva A.	J Biol Chem.	2015 Nov 20	290(47):28515-29.	Not PD specific
26405178	A Novel Hsp90 Inhibitor Activates Compensatory Heat Shock Protein Responses and Autophagy and Alleviates Mutant A53T α-Synuclein Toxicity	Xiong R, Zhou W, Siegel D, Kitson RR, Freed CR, Moody CJ, Ross D.	Mol Pharmacol.	2015 Dec	88(6):1045-54.	x
26415025	Discovery of a novel neuroprotectant, BHDPC, that protects against MPP+/MPTP-induced neuronal death in multiple experimental models	Chong CM, Ma D, Zhao C, Franklin RJ, Zhou ZY, Ai N, Li C, Yu H, Hou T, Sa F, Lee SM.	Free Radic Biol Med.	2015 Dec	89:1057-66.	x
26435084	Bcl-xL-mediated antioxidant function abrogates the disruption of mitochondrial dynamics induced by LRRK2 inhibition	Saez-Atienzar S, Bonet-Ponce L, da Casa C, Perez-Dolz L, Blesa JR, Nava E, Galindo MF, Jordan J.	Biochim Biophys Acta.	2016 Jan	1862(1):20-31.	x
26453926	MicroRNA-7 activates Nrf2 pathway by targeting Keap1 expression	Kabaria S, Choi DC, Chaudhuri AD, Jain MR, Li H, Junn E.	Free Radic Biol Med.	2015 Dec	89:548-56.	x
26455662	Protective effects of isolecanoric acid on neurodegenerative in vitro models.	de Pedro N1, Cantizani J2, Ortiz-López FJ2, González-Menéndez V2, Cautain B2, Rodríguez L2, Bills GF3, Reyes F2, Genilloud O2, Vicente F2.	Neuropharmacology.	2016 Feb	101:538-48	Not PD specific
26456643	Nicotinamide N-methyltransferase increases complex I activity in SH-SY5Y cells via sirtuin 3	Liu KY, Mistry RJ, Aguirre CA, Fasouli ES, Thomas MG, Klamt F, Ramsden DB, Parsons RB.	Biochem Biophys Res Commun.	2015 Nov 20	467(3):491-6.	x
26464625	Upregulation of cell surface estrogen receptor alpha is associated with the mitogen-activated protein kinase/extracellular signal-regulated kinase activity and promotes autophagy maturation.	Li XZ1, Sui CY1, Chen Q1, Chen XP1, Zhang H1, Zhou XP1.	Int J Clin Exp Pathol.	2015 Aug 1	;8(8):8832-41	mouse SHSY5Y
26468903	Cellular response of human neuroblastoma cells to α-synuclein fibrils, the main constituent of Lewy bodies	Pieri L, Chafey P, Le Gall M, Clary G, Melki R, Redeker V.	Biochim Biophys Acta.	2016 Jan	1860(1 Pt A):8-19.	x
26491229	S-Nitrosoglutathione Reductase Plays Opposite Roles in SH-SY5Y Models of Parkinson's Disease and Amyotrophic Lateral Sclerosis	Rizza S, Cirotti C, Montagna C, Cardaci S, Consales C, Cozzolino M, CarrÃ MT, Cecconi F, Filomeni G.	Mediators Inflamm.	2015	2015:536238.	x
26498265	Proteasome subunit and opioid receptor gene expression down-regulation induced by paraquat and maneb in human neuroblastoma SH-SY5Y cells	Caputi FF, Carretta D, Lattanzio F, Palmisano M, Candeletti S, Romualdi P.	Environ Toxicol Pharmacol.	2015 Nov	40(3):895-900.	x
26499517	Tiagabine Protects Dopaminergic Neurons against Neurotoxins by Inhibiting Microglial Activation	Liu J, Huang D, Xu J, Tong J, Wang Z, Huang L, Yang Y, Bai X, Wang P, Suo H, Ma Y, Yu M, Fei J, Huang F.	Sci Rep.	2015 Oct 26	5:15720.	x
26502720	Suppression of MAPK attenuates neuronal cell death induced by activated glia-conditioned medium in alpha-synuclein overexpressing SH-SY5Y cells	Yshii LM, Denadai-Souza A, Vasconcelos AR, Avellar MC, Scavone C.	J Neuroinflammation.	2015 Oct 26	12:193.	x
26509433	Mitochondrial and lysosomal biogenesis are activated following PINK1/parkin-mediated mitophagy	Ivankovic D, Chau KY, Schapira AH, Gegg ME.	J Neurochem.	2016 Jan	136(2):388-402.	x
26534909	Adenosine A2A Receptors Modulate α-Synuclein Aggregation and Toxicity	Ferreira DG, Batalha VL, Vicente Miranda H, Coelho JE, Gomes R, GonÃ§alves FQ, Real JI, Rino J, Albino-Teixeira A, Cunha RA, Outeiro TF, Lopes LV.	Cereb Cortex.	2015 Nov 2		x
26537816	Neuroprotective Effects of Tanshinone I Against 6-OHDA-Induced Oxidative Stress in Cellular and Mouse Model of Parkinson's Disease Through Upregulating Nrf2	Jing X, Wei X, Ren M, Wang L, Zhang X, Lou H.	Neurochem Res.	2016 Apr	41(4):779-86.	x
26545632	A novel histone deacetylase 1 and 2 isoform-specific inhibitor alleviates experimental Parkinson's disease	Choong CJ, Sasaki T, Hayakawa H, Yasuda T, Baba K, Hirata Y, Uesato S, Mochizuki H.	Neurobiol Aging.	2016 Jan	37:103-16.	x
26556726	The neuroprotection of cannabidiol against MPPâº-induced toxicity in PC12 cells involves trkA receptors, upregulation of axonal and synaptic proteins, neuritogenesis, and might be relevant to Parkinson's disease	Santos NA, Martins NM, Sisti FM, Fernandes LS, Ferreira RS, Queiroz RH, Santos AC.	Toxicol In Vitro.	2015 Dec 25	30(1 Pt B):231-40.	x
26578166	Tianma Gouteng Yin, a Traditional Chinese Medicine decoction, exerts neuroprotective effects in animal and cellular models of Parkinson's disease	Liu LF, Song JX, Lu JH, Huang YY, Zeng Y, Chen LL, Durairajan SS, Han QB, Li M.	Sci Rep.	2015 Nov 18	5:16862.	x
26593210	Anti-apoptotic effect of modified Chunsimyeolda-tang, a traditional Korean herbal formula, on MPTP-induced neuronal cell death in a Parkinson's disease mouse model	Li H, Park G, Bae N, Kim J, Oh MS, Yang HO.	J Ethnopharmacol.	2015 Dec 24	176:336-44.	x
26608462	Curcumin inhibits apoptosis by regulating intracellular calcium release, reactive oxygen species and mitochondrial depolarization levels in SH-SY5Y neuronal cells	UÄŸuz AC, Ã-z A, NazÄ±roÄŸlu M.	J Recept Signal Transduct Res.	2016 Aug	36(4):395-401.	x
26608648	Lithium protects dopaminergic cells from rotenone toxicity via autophagy enhancement	Hou L, Xiong N, Liu L, Huang J, Han C, Zhang G, Li J, Xu X, Lin Z, Wang T.	BMC Neurosci.	2015 Nov 25	16:82.	x
26620202	High-content analysis of α-synuclein aggregation and cell death in a cellular model of Parkinson's disease	Macchi F, Deleersnijder A, Van den Haute C, Munck S, Pottel H, Michiels A, Debyser Z, Gerard M, Baekelandt V.	J Neurosci Methods.	2016 Mar 1	261:117-27.	x
26631731	Tumor Necrosis Factor Receptor-associated Protein 1 (TRAP1) Mutation and TRAP1 Inhibitor Gamitrinib-triphenylphosphonium (G-TPP) Induce a Forkhead Box O (FOXO)-dependent Cell Protective Signal from Mitochondria	Kim H, Yang J, Kim MJ, Choi S, Chung JR, Kim JM, Yoo YH, Chung J, Koh H.	J Biol Chem.	2016 Jan 22	291(4):1841-53.	x
26633009	A Proteomics Approach to Investigate miR-153-3p and miR-205-5p Targets in Neuroblastoma Cells	Patil KS, Basak I, Pal R, Ho HP, Alves G, Chang EJ, Larsen JP, MÃ¸ller SG.	PLoS One.	2015	10(12):e0143969.	x
26634154	Differential Expression of Tyrosine Hydroxylase Protein and Apoptosis-Related Genes in Differentiated and Undifferentiated SH-SY5Y Neuroblastoma Cells Treated with MPP(.)	Khwanraj K, Phruksaniyom C, Madlah S, Dharmasaroja P.	Neurol Res Int.	2015	2015:734703.	x
26649942	A pivotal role of FOS-mediated BECN1/Beclin 1 upregulation in dopamine D2 and D3 receptor agonist-induced autophagy activation	Wang JD, Cao YL, Li Q, Yang YP, Jin M, Chen D, Wang F, Wang GH, Qin ZH, Hu LF, Liu CF.	Autophagy.	2015 Nov 2	11(11):2057-2073.	x
26655464	Pinocembrin attenuates MPP(+)-induced neurotoxicity by the induction of heme oxygenase-1 through ERK1/2 pathway	Wang H, Wang Y, Zhao L, Cui Q, Wang Y, Du G.	Neurosci Lett.	2016 Jan 26	612:104-9.	x
26686574	Protective effect of carnosic acid against paraquat-induced redox impairment and mitochondrial dysfunction in SH-SY5Y cells: Role for PI3K/Akt/Nrf2 pathway	de Oliveira MR, Ferreira GC, Schuck PF.	Toxicol In Vitro.	2016 Apr	32:41-54.	x
26695835	Harnessing the trophic and modulatory potential of statins in a dopaminergic cell line	Schmitt M, Dehay B, Bezard E, Garcia-Ladona FJ.	Synapse.	2016 Mar	70(3):71-86.	Not accessible
26710242	Dopamine induces mitochondrial depolarization without activating PINK1-mediated mitophagy	Bondi H, Zilocchi M, Mare MG, D'Agostino G, Giovannardi S, Ambrosio S, Fasano M, Alberio T.	J Neurochem.	2015 Dec 28		x
26711807	Alpha synuclein dimers and oligomers are increased in overexpressing conditions in vitro and in vivo	Marmolino D, Foerch P, Atienzar FA, Staelens L, Michel A, Scheller D.	Mol Cell Neurosci.	2016 Mar	71:92-101.	x
26722480	Silencing of SIAH1 in SH-SY5Y affects α-synuclein degradation pathway	Xu J, Zhang XZ, Zhang YJ, Li XM, Cai ZL, Li XM.	Int J Clin Exp Pathol.	2015	8(10):12885-92.	x
26740400	Neuroprotection of inositol hexaphosphate and changes of mitochondrion mediated apoptotic pathway and α-synuclein aggregation in 6-OHDA induced parkinson's disease cell model.	Zhang Z1, Hou L2, Li X3, Ju C4, Zhang J1, Li X5, Wang X5, Liu C6, Lv Y1, Wang Y1.	Brain Res.	2016 Feb 15	1633:87-95	x
26756041	Synthesis of ROS scavenging microspheres from a dopamine containing poly(β-amino ester) for applications for neurodegenerative disorders	Newland B, Wolff P, Zhou D, Wang W, Zhang H, Rosser A, Wang W, Werner C.	Biomater Sci.	2016 Feb 23	4(3):400-4.	x
26768367	The epigenetic regulation of HIF-1α by SIRT1 in MPP(+) treated SH-SY5Y cells	Dong SY, Guo YJ, Feng Y, Cui XX, Kuo SH, Liu T, Wu YC.	Biochem Biophys Res Commun.	2016 Feb 5	470(2):453-9.	x
26769362	Effect of the pituitary adenylate cyclase-activating polypeptide on the autophagic activation observed in in vitro and in vivo models of Parkinson's disease	Lamine-Ajili A, Fahmy AM, LÃ©tourneau M, Chatenet D, LabontÃ© P, Vaudry D, Fournier A.	Biochim Biophys Acta.	2016 Apr	1862(4):688-95.	x
26785691	Ropinirole alters gene expression profiles in SH-SY5Y cells: a whole genome microarray study	Zhu MZ, Le WD, Jin G.	Braz J Med Biol Res.	2016 Feb	49(2):e4857.	x
26788968	Coffee induces vascular endothelial growth factor (VEGF) expression in human neuroblastama SH-SY5Y cells	Kakio S, Funakoshi-Tago M, Kobata K, Tamura H.	Nutr Neurosci.	2016 Jan 20		Not accessible
26797274	Activated cathepsin L is associated with the switch from autophagy to apoptotic death of SH-SY5Y cells exposed to 6-hydroxydopamine	Li L, Gao L, Song Y, Qin ZH, Liang Z.	Biochem Biophys Res Commun.	2016 Feb 12	470(3):579-85.	x
26801612	MicroRNA-7 Regulates the Function of Mitochondrial Permeability Transition Pore by Targeting VDAC1 Expression	Chaudhuri AD, Choi DC, Kabaria S, Tran A, Junn E.	J Biol Chem.	2016 Mar 18	291(12):6483-93.	Not PD specific
26809317	The ameliorative effect of Monascus purpureus NTU 568-fermented rice extracts on 6-hydroxydopamine-induced neurotoxicity in SH-SY5Y cells and the rat model of Parkinson's disease	Tseng WT, Hsu YW, Pan TM.	Food Funct.	2016 Feb 17	7(2):752-62.	x
26813311	Detection of Free and Protein-Bound ortho-Quinones by Near-Infrared Fluorescence.	Mazzulli JR1, Burbulla LF1, Krainc D1, Ischiropoulos H2,3.	Anal Chem.	2016 Feb 16	88(4):2399-405	x
26818499	Regulation of ATP13A2 via PHD2-HIF1α Signaling Is Critical for Cellular Iron Homeostasis: Implications for Parkinson's Disease.	Rajagopalan S1, Rane A1, Chinta SJ2, Andersen JK2.	J Neurosci.	2016 Jan 27	36(4):1086-95	x
26826381	MTERF2 contributes to MPP(+)-induced mitochondrial dysfunction and cell damage	Han Y, Gao P, Qiu S, Zhang L, Yang L, Zuo J, Zhong C, Zhu S, Liu W.	Biochem Biophys Res Commun.	2016 Feb 26	471(1):177-83.	x
26846854	Preparation and Characterization of Stable α-Synuclein Lipoprotein Particles	Eichmann C, Campioni S, Kowal J, Maslennikov I, Gerez J, Liu X, Verasdonck J, Nespovitaya N, Choe S, Meier BH, Picotti P, Rizo J, Stahlberg H, Riek R.	J Biol Chem.	2016 Apr 15	291(16):8516-27.	Not use of SH-SY5Y as a cell model for PD
26854247	Iron-induced oxidative stress activates AKT and ERK1/2 and decreases Dyrk1B and PRMT1 in neuroblastoma SH-SY5Y cells	Bautista E, Vergara P, Segovia J.	J Trace Elem Med Biol.	2016 Mar	34:62-9.	x
26856988	Neuroprotective effect of asiatic acid on rotenone-induced mitochondrial dysfunction and oxidative stress-mediated apoptosis in differentiated SH-SYS5Y cells	Nataraj J, Manivasagam T, Justin Thenmozhi A, Essa MM.	Nutr Neurosci.	2016 Feb 9		x
26864693	Downregulation of miR-384-5p attenuates rotenone-induced neurotoxicity in dopaminergic SH-SY5Y cells through inhibiting endoplasmic reticulum stress	Jiang M, Yun Q, Shi F, Niu G, Gao Y, Xie S, Yu S.	Am J Physiol Cell Physiol.	2016 May 1	310(9):C755-63.	x
26866473	Selenoprotein T Exerts an Essential Oxidoreductase Activity That Protects Dopaminergic Neurons in Mouse Models of Parkinson's Disease	Boukhzar L, Hamieh A, Cartier D, Tanguy Y, Alsharif I, Castex M, Arabo A, Hajji SE, Bonnet JJ, Errami M, Falluel-Morel A, Chagraoui A, Lihrmann I, Anouar Y.	Antioxid Redox Signal.	2016 Apr 10	24(11):557-74.	x
26869225	The Parkinson's-disease-associated receptor GPR37 undergoes metalloproteinase-mediated N-terminal cleavage and ectodomain shedding	Mattila SO, Tuusa JT, PetÃ¤jÃ¤-Repo UE.	J Cell Sci.	2016 Apr 1	129(7):1366-77.	Not use of SH-SY5Y as a cell model for PD
26890746	STX, a Novel Membrane Estrogen Receptor Ligand, Protects Against Amyloid-β Toxicity	Gray NE, Zweig JA, Kawamoto C, Quinn JF, Copenhaver PF.	J Alzheimers Dis.	2016 Feb 3	51(2):391-403.	Not PD specific
26894491	Regulation of DJ-1 by glutaredoxin 1 in vivo - implications for Parkinson's disease	Johnson WM, Golczak M, Choe K, Currran PL, Gorelenkova Miller O, Yao C, Wang W, Lin J, Milkovic NM, Ray A, Ravindranath V, Zhu X, Wilson MA, Wilson-Delfosse AL, Chen SG, Mieyal JJ.	Biochemistry.	2016 Feb 19		x
26894577	Identification of protein phosphatase 2A as an interacting protein of leucine-rich repeat kinase 2	Athanasopoulos PS, Jacob W, Neumann S, Kutsch M, Wolters D, Tan EK, Bichler Z, Herrmann C, Heumann R.	Biol Chem.	2016 Jun 1	397(6):541-54.	x
26904174	Involvement of Mu Opioid Receptor Signaling in the Protective Effect of Opioid against 6-Hydroxydopamine-Induced SH-SY5Y Human Neuroblastoma Cells Apoptosis	Eftekhar-Vaghefi S, Esmaeili-Mahani S, Elyasi L, Abbasnejad M.	Basic Clin Neurosci.	2015 Jul	6(3):171-8.	x
26909380	Comparison of the amyloid pore forming properties of rat and human Alzheimer's beta-amyloid peptide 1-42: Calcium imaging data	Di Scala C, Yahi N, Flores A, Boutemeur S, Kourdougli N, Chahinian H, Fantini J.	Data Brief.	2016 Mar	6:640-3.	Not PD specific
26913805	Overexpression of DJ-1/PARK7, Parkinson's disease-related protein, improves mitochondrial function via Akt phosphorylation on threonine 308 in dopaminergic neuron-like cells	Zhang Y, Gong XG, Wang ZZ, Sun HM, Guo ZY, Hu JH, Ma L, Li P, Chen NH.	Eur J Neurosci.	2016 Feb 23		x
26926877	X-ray Crystallographic Structure of Oligomers Formed by a Toxic β-Hairpin Derived from α-Synuclein: Trimers and Higher-Order Oligomers	Salveson PJ, Spencer RK, Nowick JS.	J Am Chem Soc.	2016 Apr 6	138(13):4458-67.	x
26936423	The Prevalence and Distribution of Neurodegenerative Compound-Producing Soil Streptomyces spp.	Watkins AL1, Ray A1, R Roberts L1, Caldwell KA1, Olson JB1.	Sci Rep.	2016 Mar 3	6:22566	Not PD specific
26937174	Treatment with a Ginkgo biloba extract, EGb 761, inhibits excitotoxicity in an animal model of spinocerebellar ataxia type 17	Huang DS, Lin HY, Lee-Chen GJ, Hsieh-Li HM, Wu CH, Lin JY.	Drug Des Devel Ther.	2016	10:723-31.	Not PD specific
26951766	Quantitative proteomics study of the neuroprotective effects of B12 on hydrogen peroxide-induced apoptosis in SH-SY5Y cells	Zhong L, Zhou J, Chen X, Lou Y, Liu D, Zou X, Yang B, Yin Y, Pan Y.	Sci Rep.	2016 Mar 8	6:22635.	Not PD specific
26953010	Fas expression promotes proteasomal activity in toxin-induced parkinsonism.	Landau AM1, Siegrist-Johnstone R1, Desbarats J1.	Acta Neuropsychiatr.	2012 Jun	24(3):166-71	Not accessible
26953346	Superoxide Dismutase (SOD)-mimetic M40403 Is Protective in Cell and Fly Models of Paraquat Toxicity: IMPLICATIONS FOR PARKINSON DISEASE	Filograna R, Godena VK, Sanchez-Martinez A, Ferrari E, Casella L, Beltramini M, Bubacco L, Whitworth AJ, Bisaglia M.	J Biol Chem.	2016 Apr 22	291(17):9257-67.	x
26957005	Reciprocal signals between microglia and neurons regulate α-synuclein secretion by exophagy through a neuronal cJUN-N-terminal kinase-signaling axis	Christensen DP, Ejlerskov P, Rasmussen I, Vilhardt F.	J Neuroinflammation.	2016 Mar 8	13(1):59.	x
26960935	Inhibition of store-operated calcium entry by sub-lethal levels of proteasome inhibition is associated with STIM1/STIM2 degradation	Kuang XL, Liu Y, Chang Y, Zhou J, Zhang H, Li Y, Qu J, Wu S.	Cell Calcium.	2016 Apr	59(4):172-80.	Not PD specific
26970393	Hydroxytyrosol induces phase II detoxifying enzyme expression and effectively protects dopaminergic cells against dopamine- and 6-hydroxydopamine induced cytotoxicity	Yu G, Deng A, Tang W, Ma J, Yuan C, Ma J.	Neurochem Int.	2016 Jun	96:113-20.	x
26971449	Promotion of mitochondrial biogenesis by necdin protects neurons against mitochondrial insults	Hasegawa K, Yasuda T, Shiraishi C, Fujiwara K, Przedborski S, Mochizuki H, Yoshikawa K.	Nat Commun.	2016 Mar 14	7:10943.	x
26979073	Long Non-coding RNA HOTAIR Promotes Parkinson's Disease Induced by MPTP Through up-regulating the Expression of LRRK2	Liu S, Cui B, Dai ZX, Shi PK, Wang ZH, Guo YY.	Curr Neurovasc Res.	2016	13(2):115-20.	Not accessible
26981313	Comparative mRNA Expression of eEF1A Isoforms and a PI3K/Akt/mTOR Pathway in a Cellular Model of Parkinson's Disease	Khwanraj K, Madlah S, Grataitong K, Dharmasaroja P.	Parkinsons Dis.	2016	2016:8716016.	x
26982234	5-((3-Amidobenzyl)oxy)nicotinamides as Sirtuin 2 Inhibitors	Ai T, Wilson DJ, More SS, Xie J, Chen L.	J Med Chem.	2016 Apr 14	59(7):2928-41.	x
26984067	Functionally different α-synuclein inclusions yield insight into Parkinson's disease pathology	Raiss CC, Braun TS, Konings IB, Grabmayr H, Hassink GC, Sidhu A, le Feber J, Bausch AR, Jansen C, Subramaniam V, Claessens MM.	Sci Rep.	2016 Mar 17	6:23116.	x
26994872	Protection against MPP(+)-induced neurotoxicity in SH-SY5Y cells by tormentic acid via the activation of PI3-K/Akt/GSK3β pathway	Zhao Q, Ye J, Wei N, Fong C, Dong X.	Neurochem Int.	2016 Mar 16		x
26996132	Deferoxamine-mediated up-regulation of HIF-1α prevents dopaminergic neuronal death via the activation of MAPK family proteins in MPTP-treated mice	Guo C, Hao LJ, Yang ZH, Chai R, Zhang S, Gu Y, Gao HL, Zhong ML, Wang T, Li JY, Wang ZY.	Exp Neurol.	2016 Jun	280:13-23.	x
27001148	Mic60/mitofilin overexpression alters mitochondrial dynamics and attenuates vulnerability of dopaminergic cells to dopamine and rotenone	Van Laar VS, Berman SB, Hastings TG.	Neurobiol Dis.	2016 Jul	91:247-61.	x
27003614	microRNA-7 Protects Against 1-Methyl-4-Phenylpyridinium Iodide-Induced Cell Apoptosis in SH-SY5Y Cells by Directly Targeting KrÃ¼pple-Like Factor 4	Kong B, Wu PC, Chen L, Yang T, Yuan YQ, Kuang YQ, Cheng L, Zhou HT, Gu JW.	DNA Cell Biol.	2016 May	35(5):217-25.	x
27003822	NCAM-140 Translocation into Lipid Rafts Mediates the Neuroprotective Effects of GDNF	Li L, Chen H, Wang M, Chen F, Gao J, Sun S, Li Y, Gao D.	Mol Neurobiol.	2016 Mar 22		x
27003823	Curcumin Rescues a PINK1 Knock Down SH-SY5Y Cellular Model of Parkinson's Disease from Mitochondrial Dysfunction and Cell Death	van der Merwe C, van Dyk HC, Engelbrecht L, van der Westhuizen FH, Kinnear C, Loos B, Bardien S.	Mol Neurobiol.	2016 Mar 22		x
27013469	Carnosic Acid Attenuates 6-Hydroxydopamine-Induced Neurotoxicity in SH-SY5Y Cells by Inducing Autophagy Through an Enhanced Interaction of Parkin and Beclin1	Lin CY, Tsai CW.	Mol Neurobiol.	2016 Mar 25		x
27026709	Linking Inflammation and Parkinson Disease: Hypochlorous Acid Generates Parkinsonian Poisons	Jeitner TM, Kalogiannis M, Krasnikov BF, Gomlin I, Peltier MR, Moran GR.	Toxicol Sci.	2016 Mar 29		x
27030050	High expression of α-synuclein in damaged mitochondria with PLA2G6 dysfunction.	Sumi-Akamaru H1, Beck G2, Shinzawa K3, Kato S4, Riku Y5,6, Yoshida M6, Fujimura H7, Tsujimoto Y3,8, Sakoda S7, Mochizuki H9.	Acta Neuropathol Commun.	2016 Mar 30	4:27	x
27034775	Methylation status of DJ-1 in leukocyte DNA of Parkinson's disease patients	Tan Y, Wu L, Li D, Liu X, Ding J, Chen S.	Transl Neurodegener.	2016	5:5.	x
27053302	SIRT3 Acts as a Neuroprotective Agent in Rotenone-Induced Parkinson Cell Model	Zhang JY, Deng YN, Zhang M, Su H, Qu QM.	Neurochem Res.	2016 Apr 6		x
27064513	Influence of 6-Hydroxydopamine Toxicity on α-Synuclein Phosphorylation, Resting Vesicle Expression and Vesicular Dopamine Release	Ganapathy K, Datta I, Sowmithra S, Joshi P, Bhonde R.	J Cell Biochem.	2016 Apr 11		x
27064872	Knockdown of JMJD1C, a target gene of hsa-miR-590-3p, inhibits mitochondrial dysfunction and oxidative stress in MPP+-treated MES23.5 and SH-SY5Y cells	Wang J, Le T, Wei R, Jiao Y.	Cell Mol Biol (Noisy-le-grand).	2016 Mar 20	62(3):39-45.	Not accessible
27073711	Protection against Mitochondrial and Metal Toxicity Depends on Functional Lipid Binding Sites in ATP13A2.	Martin S1, van Veen S2, Holemans T2, Demirsoy S3, van den Haute C4, Baekelandt V5, Agostinis P3, Eggermont J2, Vangheluwe P2.	Parkinsons Dis.	2016	2016:9531917	x
27091487	Carnosic acid protects SH-SY5Y cells against 6-hydroxydopamine-induced cell death through upregulation of parkin pathway	Lin CY, Tsai CW, Tsai CW.	Neuropharmacology.	2016 Apr 15		x
27091500	PINK1/Parkin-mediated mitophagy play a protective role in manganese induced apoptosis in SH-SY5Y cells	Zhang HT, Mi L, Wang T, Yuan L, Li XH, Dong LS, Zhao P, Fu JL, Yao BY, Zhou ZC.	Toxicol In Vitro.	2016 Apr 16	34:212-219.	x
27103513	Diaminodiphenyl sulfone-induced parkin ameliorates age-dependent dopaminergic neuronal loss	Lee YI, Kang H, Ha YW, Chang KY, Cho SC, Song SO, Kim H, Jo A, Khang R, Choi JY, Lee Y, Park SC, Shin JH.	Neurobiol Aging.	2016 May	41:1-10.	x
27105068	Direct Observation of α-Synuclein Amyloid Aggregates in Endocytic Vesicles of Neuroblastoma Cells	Apetri MM, Harkes R, Subramaniam V, Canters GW, Schmidt T, Aartsma TJ.	PLoS One.	2016	11(4):e0153020.	x
27105955	Novel multifunctional pharmacology of lobinaline, the major alkaloid from Lobelia cardinalis	Brown DP, Rogers DT, Pomerleau F, Siripurapu KB, Kulshrestha M, Gerhardt GA, Littleton JM.	Fitoterapia.	2016 Apr 20	111:109-123.	Not PD specific
27108049	Parkinson's disease-like forelimb akinesia induced by BmK I, a sodium channel modulator.	Zhu H1, Wang Z2, Jin J3, Pei X3, Zhao Y3, Wu H3, Lin W3, Tao J3, Ji Y3.	Behav Brain Res.	2016 Jul 15	308:166-76	x
27108097	Neuroprotective effects of pyrroloquinoline quinone against rotenone injury in primary cultured midbrain neurons and in a rat model of Parkinson's disease	Zhang Q, Chen S, Yu S, Qin J, Zhang J, Cheng Q, Ke K, Ding F.	Neuropharmacology.	2016 Apr 20		x
27114059	Protective effects of DJ-1 medicated Akt phosphorylation on mitochondrial function are promoted by Da-Bu-Yin-Wan in 1-methyl-4-phenylpyridinium-treated human neuroblastoma SH-SY5Y cells	Zhang Y, Gong XG, Wang ZZ, Sun HM, Guo ZY, Gai C, Hu JH, Ma L, Li P, Chen NH.	J Ethnopharmacol.	2016 Apr 22		x
27121078	Down-regulation of p21-activated serine/threonine kinase 1 is involved in loss of mesencephalic dopamine neurons.	Kim H1, Oh JY1, Choi SL1, Nam YJ1, Jo A1, Kwon A1, Shin EY2, Kim EG2, Kim HK3,4.	Mol Brain.	2016 Apr 27	9(1):45	x
27133439	Rotenone down-regulates HSPA8/hsc70 chaperone protein in vitro: A new possible toxic mechanism contributing to Parkinson's disease	Sala G, Marinig D, Riva C, Arosio A, Stefanoni G, Brighina L, Formenti M, Alberghina L, Colangelo AM, Ferrarese C.	Neurotoxicology.	2016 Apr 28	54:161-169.	x
27137201	hVMAT2: A Target of Individualized Medication for Parkinson's Disease	Xiong N, Li N, Martin E, Yu J, Li J, Liu J, Lee DY, Isacson O, Vance J, Qing H, Wang T, Lin Z.	Neurotherapeutics.	2016 May 2		x
27143523	Characterization of three human cell line models for high-throughput neuronal cytotoxicity screening	Tong ZB, Hogberg H, Kuo D, Sakamuru S, Xia M, Smirnova L, Hartung T, Gerhold D.	J Appl Toxicol.	2016 May 3		Method description
27145383	Mesencephalic astrocyte-derived neurotrophic factor reduces cell apoptosis via upregulating GRP78 in SH-SY5Y cells	Huang J, Chen C, Gu H, Li C, Fu X, Jiang M, Sun H, Xu J, Fang J, Jin L.	Cell Biol Int.	2016 May 4		x
27145922	Meclizine-induced enhanced glycolysis is neuroprotective in Parkinson disease cell models	Hong CT, Chau KY, Schapira AH.	Sci Rep.	2016 May 5	6:25344.	x
27148961	Polyubiquitination of apurinic/apyrimidinic endonuclease 1 by Parkin	Scott TL, Wicker CA, Suganya R, Dhar B, Pittman T, Horbinski C, Izumi T.	Mol Carcinog.	2016 May 5		Not PD specific
27149848	A Polymorphic Antioxidant Response Element Links NRF2/sMAF Binding to Enhanced MAPT Expression and Reduced Risk of Parkinsonian Disorders.	Wang X1, Campbell MR2, Lacher SE3, Cho HY4, Wan M2, Crowl CL2, Chorley BN2, Bond GL5, Kleeberger SR4, Slattery M3, Bell DA6.	Cell Rep.	2016 Apr 13	pii: S2211-1247(16)30357-6	Not PD specific
27151187	Investigation of Long Non-coding RNA Expression Profiles in the Substantia Nigra of Parkinson's Disease	Ni Y, Huang H, Chen Y, Cao M, Zhou H, Zhang Y.	Cell Mol Neurobiol.	2016 May 5		x
27159951	[COMPARISON OF CYTOPROTECTIVE EFFECTS OF HEMANTANE AND AMANTADINE UNDER CONDITIONS OF 6-HYDROXYDOPAMINE NEUROTOXIN ACTION ON CULTURED HUMAN NEUROBLASTOMA CELLS]	Logvinov IO, Antipova TA, Nepoklonov AV, Valdman EA.	Eksp Klin Farmakol.	2016	79(1):12-4.	Russian
27163164	Polysulfides protect SH-SY5Y cells from methylglyoxal-induced toxicity by suppressing protein carbonylation: A possible physiological scavenger for carbonyl stress in the brain	Koike S, Kayama T, Yamamoto S, Komine D, Tanaka R, Nishimoto S, Suzuki T, Kishida A, Ogasawara Y.	Neurotoxicology.	2016 May 6		Not PD specific
27163642	SIRT2 regulates insulin sensitivity in insulin-resistant neuronal cells	Arora A, Dey CS.	Biochem Biophys Res Commun.	2016 May 6		Not PD specific
27166294	Trichloroethylene exposure aggravates behavioral abnormalities in mice that are deficient in superoxide dismutase.	Otsuki N1, Homma T1, Fujiwara H2, Kaneko K2, Hozumi Y3, Shichiri M4, Takashima M4, Ito J1, Konno T1, Kurahashi T1, Yoshida Y5, Goto K3, Fujii S2, Fujii J6.	Regul Toxicol Pharmacol.	2016 Aug	79:83-90	Not PD specific
27173227	Protective effects and mechanisms of Ndfipl on SH-SY5Y cell apoptosis in an in vitro Parkinson's disease model	Xing LF, Guo HP, Wang DT, Sun LH, Pan SY.	Genet Mol Res.	2016 Apr 25	15(2).	x
27173998	Geniposide reduces α-synuclein by blocking microRNA-21/lysosome-associated membrane protein 2A interaction in Parkinson disease models	Su C, Yang X, Lou J.	Brain Res.	2016 May 9		x
27194339	Pathogenic Upregulation of Glial Lipocalin-2 in the Parkinsonian Dopaminergic System.	Kim BW, Jeong KH, Kim JH, Jin M, Kim JH, Lee MG, Choi DK, Won SY, McLean C, Jeon MT, Lee HW, Kim SR, Suk K.	J Neurosci.	2016 May 18	36(20):5608-22	x
27196724	Protection against 1-methyl-4-phenyl pyridinium-induced neurotoxicity in human neuroblastoma SH-SY5Y cells by Soyasaponin I by the activation of the phosphoinositide 3-kinase/AKT/GSK3β pathway.	Guo Z, Cao W, Zhao S, Han Z, Han B.	Neuroreport.	2016 Jul 6	27(10):730-6	x
27207919	Metformin Prevents Dopaminergic Neuron Death in MPTP/P-Induced Mouse Model of Parkinson's Disease via Autophagy and Mitochondrial ROS Clearance	Lu M, Su C, Qiao C, Bian Y, Ding J, Hu G.	Int J Neuropsychopharmacol.	2016 May 23		x
27217159	Inverse Expression Levels of EphrinA3 and EphrinA5 Contribute to Dopaminergic Differentiation of Human SH-SY5Y Cells.	Wang T, Chen J, Tang CX, Zhou XY, Gao DS.	J Mol Neurosci.	2016 May 23		x
27229883	β-Ecdysterone Protects SH-SY5Y Cells Against 6-Hydroxydopamine-Induced Apoptosis via Mitochondria-Dependent Mechanism: Involvement of p38MAPK-p53 Signaling Pathway.	Pan Z, Niu Y, Liang Y, Zhang X, Dong M.	Neurotox Res.	2016 May 26		x
27255971	Caffeoylquinic Acid Derivatives Protect SH-SY5Y Neuroblastoma Cells from Hydrogen Peroxide-Induced Injury Through Modulating Oxidative Status.	Jiang XW, Bai JP, Zhang Q, Hu XZ, Tian X, Zhu J, Liu J, Meng WH, Zhao QC.	Cell Mol Neurobiol.	2016 Jun 2		Not PD specific
27256286	A Small Molecule Activator of p300/CBP Histone Acetyltransferase Promotes Survival and Neurite Growth in a Cellular Model of Parkinson's Disease.	Hegarty SV, O'Leary E, Solger F, Stanicka J, Sullivan AM, O'Keeffe GW.	Neurotox Res.	2016 Jun 2		x
27309572	Mild MPP+ exposure impairs autophagic degradation through a novel lysosomal acidity-independent mechanism.	Miyara M, Kotake Y, Tokunaga W, Sanoh S, Ohta S.	J Neurochem.	2016 Jun 16		x
27314756	Reduction of Immunoreactivity Against the C-Terminal Region of the Intracellular α-Synuclein by Exogenous α-Synuclein Aggregates: Possibility of Conformational Changes.	Izumi Y, Kondo N, Takahashi R, Akaike A, Kume T.	J Parkinsons Dis.	2016 Jun 16		x
27329039	MiR-144-3p and Its Target Gene β-Amyloid Precursor Protein Regulate 1-Methyl-4-Phenyl-1,2-3,6-Tetrahydropyridine-Induced Mitochondrial Dysfunction.	Li K, Zhang J, Ji C, Wang L.	Mol Cells.	2016 Jun 21		x
27339879	Caspase-1 Deficiency Alleviates Dopaminergic Neuronal Death via Inhibiting Caspase-7/AIF Pathway in MPTP/p Mouse Model of Parkinson's Disease.	Qiao C, Zhang LX, Sun XY, Ding JH, Lu M, Hu G.	Mol Neurobiol.	2016 Jun 23		x
27345029	TCF11/Nrf1-mediated induction of proteasome expression prevents cytotoxicity by Rotenone.	Sotzny F, Schormann E, Kühlewindt I, Koch A, Brehm A, Goldbach-Mansky R, Gilling KE, Krüger E.	Antioxid Redox Signal.	2016 Jun 25		x
27346674	Stress-induced nuclear translocation of CDK5 suppresses neuronal death by downregulating ERK activation via VRK3 phosphorylation.	Song H, Kim W, Choi JH, Kim SH, Lee D, Park CH, Kim S, Kim DY, Kim KT.	Sci Rep.	2016 Jun 27	6:28634	Not PD specific
27347320	miR-124 regulates cell apoptosis and autophagy in dopaminergic neurons and protects them by regulating AMPK/mTOR pathway in Parkinson's disease.	Gong X, Wang H, Ye Y, Shu Y, Deng Y, He X, Lu G, Zhang S.	Am J Transl Res.	2016 May 15	8(5):2127-37	x
27364102	LRRK2 interferes with aggresome formation for autophagic clearance.	Bang Y, Kim KS, Seol W, Choi HJ.	Mol Cell Neurosci.	2016 Jun 27		x
27366949	Delta-9-tetrahydrocannabinol protects against MPP+ toxicity in SH-SY5Y cells by restoring proteins involved in mitochondrial biogenesis.	Zeissler ML, Eastwood J, McCorry K, Hanemann CO, Zajicek JP, Carroll CB.	Oncotarget.	2016 Jun 27		x
27380887	Genome-wide analysis of DNA methylation during antagonism of DMOG to MnCl2-induced cytotoxicity in the mouse substantia nigra.	Yang N, Wei Y, Wang T, Guo J, Sun Q, Hu Y, Yan X, Zhu X, Tang B, Xu Q.	Sci Rep.	2016 Jul 6	6:28933	SH-SY5Y used in previous studies
27389312	Nicotinamide N-methyltransferase catalyses the N-methylation of the endogenous β-carboline norharman: evidence for a novel detoxification pathway.	Thomas MG, Sartini D, Emanuelli M, van Haren MJ, Martin NI, Mountford DM, Barlow DJ, Klamt F, Ramsden DB, Reza M, Parsons RB.	Biochem J.	2016 Jul 7		x
27389777	Noggin Along with a Self-Assembling Peptide Nanofiber Containing Long Motif of Laminin Induces Tyrosine Hydroxylase Gene Expression.	Tavakol S1,2,3, Musavi SM4, Tavakol B5, Hoveizi E6, Ai J7,8, Rezayat SM9,10,11.	Mol Neurobiol.	2016 Jul 8.	[Epub ahead of print]	Not PD specific
27391369	Gas1 up-regulation is inducible and contributes to cell apoptosis in reactive astrocytes in the substantia nigra of LPS and MPTP models.	Sun XL, Chen BY, Zhao HK, Cheng YY, Zheng MH, Duan L, Jiang W, Chen LW.	J Neuroinflammation.	2016 Jul 8	13(1):180	x
27395789	Nimodipine, an L-type calcium channel blocker attenuates mitochondrial dysfunctions to protect against 1-methyl-4-phenyl-1,2,3,6-tetrahydropyridine-induced parkinsonism in mice.	Singh A, Verma P, Balaji G, Samantaray S, Mohanakumar KP.	Neurochem Int.	2016 Jul 6	S0197-0186(16)30199-1	x
27412483	Novel incretin analogues improve autophagy and protect from mitochondrial stress induced by rotenone in SH-SY5Y cells.	Jalewa J, Sharma MK, Hölscher C.	J Neurochem.	2016 Jul 14		x
27413109	Arsenic Induces Accumulation of α-Synuclein: Implications for Synucleinopathies and Neurodegeneration.	Cholanians AB, Phan AV, Ditzel EJ, Camenisch TD, Lau SS, Monks TJ.	Toxicol Sci.	2016 Jul 13	kfw117	x
27423549	Functional properties of LRRK2 mutations in Taiwanese Parkinson disease.	Chang KH1, Chen CM1, Lin CH1, Chang WT2, Jiang PR2, Hsiao YC2, Wu YR3, Lee-Chen GJ4.	J Formos Med Assoc.	2016 Jul 13	pii: S0929-6646(16)30110-3	Neuroblastoma, not SH-SY5Y
27424009	Alpha-synuclein-induced oxidative stress correlates with altered superoxide dismutase and glutathione synthesis in human neuroblastoma SH-SY5Y cells.	Perfeito R, Ribeiro M, Rego AC.	Arch Toxicol.	2016 Jul 16		x
27430912	Neuroprotective Effect of Coptis chinensis in MPP[Formula: see text] and MPTP-Induced Parkinson's Disease Models.	Friedemann T, Ying Y, Wang W, Kramer ER, Schumacher U, Fei J, Schröder S.	Am J Chin Med.	2016	44(5):907-25	Not accessible
27431098	Dimerumic Acid and Deferricoprogen Activate Ak Mouse Strain Thymoma/Heme Oxygenase-1 Pathways and Prevent Apoptotic Cell Death in 6-Hydroxydopamine-Induced SH-SY5Y Cells.	Tseng WT, Hsu YW, Pan TM.	J Agric Food Chem.	2016 Aug 3	64(30):5995-6002	x
27432061	Echinacoside Protects Against MPP(+)-Induced Neuronal Apoptosis via ROS/ATF3/CHOP Pathway Regulation.	Zhao Q, Yang X, Cai D, Ye L, Hou Y, Zhang L, Cheng J, Shen Y, Wang K, Bai Y.	Neurosci Bull.	2016 Aug	32(4):349-62	x
27457957	The neural chaperone proSAAS blocks α-synuclein fibrillation and neurotoxicity.	Jarvela TS, Lam HA, Helwig M, Lorenzen N, Otzen DE, McLean PJ, Maidment NT, Lindberg I.	Proc Natl Acad Sci U S A.	2016 Aug 9	113(32):E4708-15	x
27470562	Beta-asarone protects against MPTP-induced Parkinson's disease via regulating long non-coding RNA MALAT1 and inhibiting α-synuclein protein expression.	Zhang QS, Wang ZH, Zhang JL, Duan YL, Li GF, Zheng DL.	Biomed Pharmacother.	2016 Jun 27	83:153-159	x
27479153	Quercetin, not caffeine, is a major neuroprotective component in coffee.	Lee M, McGeer EG, McGeer PL.	Neurobiol Aging.	2016 Oct	46:113-23	Not PD specific
27482815	A new glucocerebrosidase-deficient neuronal cell model provides a tool to probe pathophysiology and therapeutics for Gaucher disease.	Westbroek W1, Nguyen M1, Siebert M2, Lindstrom T1, Burnett RA1, Aflaki E1, Jung O1, Tamargo R1, Rodriguez-Gil JL3, Acosta W4, Hendrix A5, Behre B1, Tayebi N1, Fujiwara H6, Sidhu R6, Renvoise B7, Ginns EI8, Dutra A9, Pak E9, Cramer C4, Ory DS6, Pavan WJ3, Sidransky E10.	Dis Model Mech.	2016 Jul 1	9(7):769-78	Not PD specific
27498777	Vitamin K2 suppresses rotenone-induced microglial activation in vitro.	Yu YX, Li YP, Gao F, Hu QS, Zhang Y, Chen D, Wang GH.	Acta Pharmacol Sin.	2016 Sep	37(9):1178-89	Not accessible
27509057	Increased Rab35 expression is a potential biomarker and implicated in the pathogenesis of Parkinson's disease.	Chiu CC, Yeh TH, Lai SC, Weng YH, Huang YC, Cheng YC, Chen RS, Huang YZ, Hung J, Chen CC, Lin WY, Chang HC, Chen YJ, Chen CL, Chen HY, Lin YW, Wu-Chou YH, Wang HL, Lu CS.	Oncotarget.	2016 Aug 5		x
27515055	Attenuation of Aβ toxicity by promotion of mitochondrial fusion in neuroblastoma cells by liquiritigenin.	Jo DS1, Shin DW1, Park SJ1, Bae JE1, Kim JB1, Park NY1, Kim JS2, Oh JS3, Shin JW4,5, Cho DH6,7.	Arch Pharm Res.	2016 Aug	39(8):1137-43	Review
27528587	RGS2 modulates the activity and internalization of dopamine D2 receptors in neuroblastoma N2A cells.	Luessen DJ1, Hinshaw TP1, Sun H1, Howlett AC1, Marrs G2, McCool BA1, Chen R3.	Neuropharmacology.	2016 Nov	110(Pt A):297-307	Neuroblastoma, not SH-SY5Y
27569281	Cyclophilin B protects SH-SY5Y human neuroblastoma cells against MPP+-induced neurotoxicity via JNK pathway.	Oh Y, Jeong K, Kim K, Lee YS, Jeong S, Kim SS, Yoon KS, Ha J, Kang I, Choe W.	Biochem Biophys Res Commun.	2016 Aug 25	S0006-291X(16)31399-7	x
27597528	Search for SCA2 blood RNA biomarkers highlights Ataxin-2 as strong modifier of the mitochondrial factor PINK1 levels.	Sen NE, Drost J, Gispert S, Torres-Odio S, Damrath E, Klinkenberg M, Hamzeiy H, Akdal G, Güllüoğlu H, Basak AN, Auburger G.	Neurobiol Dis.	2016 Sep 2	S0969-9961(16)30218-2	x
27616549	Palmitoylethanolamide protects mice against 6-OHDA-induced neurotoxicity and endoplasmic reticulum stress: in vivo and in vitro evidence.	Avagliano C, Russo R, De Caro C, Cristiano C, La Rana G, Piegari G, Paciello O, Citraro R, Russo E, De Sarro G, Meli R, Raso GM, Calignano A.	Pharmacol Res.	2016 Sep 8	S1043-6618(16)30903-3	x
27619838	Regenerative effects of peptide nanofibers in an experimental model of Parkinson's disease.	Sever M1, Turkyilmaz M2, Sevinc C3, Cakir A4, Ocalan B5, Cansev M6, Guler MO7, Tekinay AB8.	Acta Biomater.	2016 Dec	46:79-90	x
27622213	Adult Conditional Knockout of PGC-1α Leads to Loss of Dopamine Neurons.	Jiang H1, Kang SU1, Zhang S2, Karuppagounder S1, Xu J3, Lee YK3, Kang BG3, Lee Y4, Zhang J3, Pletnikova O5, Troncoso JC6, Pirooznia S1, Andrabi SA3, Dawson VL7, Dawson TM8.	eNeuro.	2016 Sep 2	3(4)	SH-SY5Y used to validate primers
27635664	An 11-mer Amyloid Beta Peptide Fragment Provokes Chemical Mutations and Parkinsonian Biomarker Aggregation in Dopaminergic Cells: A Novel Road Map for "Transfected" Parkinson's.	Kabiraj P1, Marin JE1, Varela-Ramirez A1, Narayan M1.	ACS Chem Neurosci.	2016 Oct 3	[Epub ahead of print]	x
27646116	Insulin on activation of autophagy with integrins and syndecans against MPP+-induced α-synuclein neurotoxicity.	Ramalingam M1, Kim SJ2.	Neurosci Lett.	2016 Oct 28	633:94-100	x
27646574	Agaricus blazei extract attenuates rotenone-induced apoptosis through its mitochondrial protective and antioxidant properties in SH-SY5Y neuroblastoma cells.	Venkatesh Gobi V1, Rajasankar S2, Ramkumar M1, Dhanalakshmi C3, Manivasagam T3, Justin Thenmozhi A3, Essa MM4,5,6, Chidambaram R7.	Nutr Neurosci.	2016 Sep	20:1-11	x
27658511	An Overview on the Role of α -Synuclein in Experimental Models of Parkinson's Disease from Pathogenesis to Therapeutics.	Javed H1, Kamal MA, Ojha S2.	CNS Neurol Disord Drug Targets.	2016	5(10):1240-1252	Review
27668538	Neuromodulatory effects of Calyptranthes grandifolia extracts against 6-hydroxydopamine-induced neurotoxicity in SH-SY5Y cells.	Kich DM1, Bitencourt S1, Alves C2, Silva J2, Pinteus S2, Pedrosa R2, Laufer S3, de Souza CF4, Goettert MI5.	Biomed Pharmacother.	2016 Sep 23	84:382-386	Not PD specific
27671228	Neuroprotective effects of fingolimod in mouse models of Parkinson's disease.	Zhao P1, Yang X1, Yang L1, Li M2, Wood K3, Liu Q4, Zhu X5.	FASEB J.	2016 Sep 26	pii: fj.201600751R	x
27722094	Transcriptome-metabolome wide association study (TMWAS) of maneb and paraquat neurotoxicity reveals network level interactions in toxicologic mechanism.	Roede JR1, Uppal K2, Park Y3, Tran V4, Jones DP5.	Toxicol Rep.	2014	1:435-444	Neuroblastoma, not SH-SY5Y
27731637	Effect of Oleracein E, a Neuroprotective Tetrahydroisoquinoline, on Rotenone-induced Parkinson's Disease Cell and Animal Models.	Sun H, He X, Liu C, Li L, Zhou R, Jin T, Yue S, Feng D, Gong J, Sun J, Ji J, Xiang L.	ACS Chem Neurosci.	2016 Oct 12	[Epub ahead of print]	x
27763504	Neuroprotective Effect of the Marine-Derived Compound 11-Dehydrosinulariolide through DJ-1-Related Pathway in In Vitro and In Vivo Models of Parkinson's Disease	Feng CW1,2,3, Hung HC4,5,6, Huang SY7,8, Chen CH9,10,11, Chen YR12, Chen CY13, Yang SN14, Wang HD15,16,17,18, Sung PJ19,20, Sheu JH21,22, Tsui KH23,24,25, Chen WF26,27, Wen ZH28,29,30.	Mar Drugs.	2016 Oct 17	14(10)	x
27765362	Medicinal herbs Oenanthe javanica (Blume) DC., Casuarina equisetifolia L. and Sorghum bicolor (L.) Moench protect human cells from MPP+ damage via inducing FBXO7 expression.	Chen CM1, Chen IC1, Chen YL2, Lin TH2, Chen WL1, Chao CY1, Wu YR1, Lu YT2, Lee CY3, Chien HC3, Chen TS4, Lee-Chen GJ5, Lee CM6.	Phytomedicine.	2016 Nov 15	23(12):1422-1433	x
27771902	Changes in Cell Cycle and Up-Regulation of Neuronal Markers During SH-SY5Y Neurodifferentiation by Retinoic Acid are Mediated by Reactive Species Production and Oxidative Stress.	Kunzler A1, Zeidán-Chuliá F2, Gasparotto J2, Girardi CS2, Klafke K2, Petiz LL2, Bortolin RC2, Rostirolla DC2, Zanotto-Filho A2, de Bittencourt Pasquali MA2, Dickson P3, Dunkley P3, Moreira JC2, Gelain DP2.	Mol Neurobiol.	2016 Oct 22.	[Epub ahead of print]	Not PD specific
27774335	N-Acetylcysteine in Combination with IGF-1 Enhances Neuroprotection against Proteasome Dysfunction-Induced Neurotoxicity in SH-SY5Y Cells.	Cheng B1, Anand P1, Kuang A2, Akhtar F1, Scofield VL1.	Parkinsons Dis.	2016	2016:6564212	Not PD specific
27796870	GPR30 Activation Contributes to the Puerarin-Mediated Neuroprotection in MPP+-Induced SH-SY5Y Cell Death.	Cheng YF1, Zhu G2, Wu QW3, Xie YS4, Jiang Y4, Guo L4, Guan YL4, Liu YS4, Zhang J4.	J Mol Neurosci.	2016 Oct 30	[Epub ahead of print]	x
27808254	α-Synuclein enhances histone H3 lysine-9 dimethylation and H3K9me2-dependent transcriptional responses.	Sugeno N1,2, Jäckel S1,3, Voigt A4,5, Wassouf Z6, Schulze-Hentrich J6, Kahle PJ1,3.	Sci Rep.	2016 Nov 3	6:36328	x
27809287	Cx43 Mediates Resistance against MPP⁺-Induced Apoptosis in SH-SY5Y Neuroblastoma Cells via Modulating the Mitochondrial Apoptosis Pathway.	Kim IS1, Ganesan P2, Choi DK3.	Int J Mol Sci.	2016 Nov 1	17(11)	x
27812368	Further structure-activity relationships study of substituted dithiolethiones as glutathione-inducing neuroprotective agents.	Brown DA1, Betharia S1, Yen JH2, Kuo PC2, Mistry H1.	Chem Cent J.	2016 Oct 19	10:64	x
27814668	Orexin-A protects human neuroblastoma SH-SY5Y cells against 6-OHDA-induced neurotoxicity: Involvement of PKC and PI3K signaling pathways.	Pasban-Aliabadi H1, Esmaeili-Mahani S2, Abbasnejad M3.	Rejuvenation Res.	2016 Nov 4	[Epub ahead of print]	x
27837450	Subcellular Parkinson's Disease-Specific Alpha-Synuclein Species Show Altered Behavior in Neurodegeneration.	Abdullah R1, Patil KS1, Rosen B1, Pal R1, Prabhudesai S1, Lee S1, Basak I1, Hoedt E2,3, Yang P1, Panick K1, Ho HP4, Chang E4, Tzoulis C5, Larsen JP6, Neubert TA2,3, Alves G6, Møller SG7,8.	Mol Neurobiol.	2016 Nov 11	[Epub ahead of print]	x
27840125	Dopamine exacerbates mutant Huntingtin toxicity via oxidative-mediated inhibition of autophagy in SH-SY5Y neuroblastoma cells: Beneficial effects of anti-oxidant therapeutics.	Vidoni C1, Castiglioni A1, Seca C1, Secomandi E1, Melone MA2, Isidoro C3.	Neurochem Int.	2016 Nov 11	101:132-143	Not PD specific
27860527	Roles of PPAR transcription factors in the energetic metabolic switch occurring during adult neurogenesis.	Di Giacomo E1, Benedetti E1, Cristiano L1, Antonosante A1, d'Angelo M1, Fidoamore A1, Barone D2, Moreno S3, Ippoliti R1, Cerù MP1, Giordano A4,5, Cimini A1,4,6.	Cell Cycle.	2016 Nov 18	[Epub ahead of print]	Not PD specific
27863657	Development and characterization of polo-like kinase 2 loaded nanoparticles-A novel strategy for (serine-129) phosphorylation of alpha-synuclein.	Rodríguez-Nogales C1, Garbayo E2, Martínez-Valbuena I3, Sebastián V4, Luquin MR5, Blanco-Prieto MJ6.	Int J Pharm.	2016 Nov 30	514(1):142-149	SH-SY5Y used to demonstrate nanoparticle entry and enzyme activity
27866262	Impairment of mitochondria dynamics by human A53T α-synuclein and rescue by NAP (davunetide) in a cell model for Parkinson's disease.	Melo TQ1,2, van Zomeren KC2, Ferrari MF1, Boddeke HW2, Copray JC3	Exp Brain Res.	2016 Nov 19	[Epub ahead of print]	x
27867274	Pharmacognostical Analysis and Protective Effect of Standardized Extract and Rizonic Acid from Erythrina velutina against 6-Hydroxydopamine-Induced Neurotoxicity in SH-SY5Y Cells.	Silva AH1, Fonseca FN1, Pimenta AT2, Lima MS2, Silveira ER2, Viana GS3, Vasconcelos SM3, Leal LK1.	Pharmacogn Mag.	2016 Oct-Dec	12(48):307-312	x
