# Supplementary material for: The SH-SY5Y cell line in Parkinson’s disease research: a systematic review
Source: Mol Neurodegener. 2017 Jan 24;12:10. doi: 10.1186/s13024-017-0149-0 (PMC5259880; doi:10.1186/s13024-017-0149-0)
Supplement: Additional file 3: — Techniques and markers used to determine the DAergic phenotype of SH-SY5Y cells. List of articles in which the DAergic phenotype of the cell line was experimentally validated, and the techniques and markers that were used, together with the cell source, media used and differentiation included or not. (XLSX 18 kb) [file 13024_2017_149_MOESM3_ESM.xlsx]

## Sheet: Additional file 3
Additional file 3. Techniques and markers used to determine the DAergic phenotype of SH-SY5Y cells.
List of articles in which the DAergic phenotype of the cell line was experimentally validated, and the techniques and markers that were used, together with the cell source, media used and differentiation included or not. qPCR: quantitative polymerase chain reaction; WB: western blot; ICC: immunocytochemistry; DA: dopamine; ATCC: American Type Culture Collection; ECACC: European Collection of Auth…
PubmedID	Technique used				Markers	Cell source	Media used	Differentiation	Conclusion	Comments
	qPCR	WB	ICC	DA uptake/content
12782106				x	DA uptake	ATCC	MEM/F12/HBSS (2:1:1), 10%FBS	No	Unidfferentiated SH-SY5Y have basal DA uptake
12928331	Not shown				TH, DAT	ATCC	DMEM, 10%FCS, antibiotics	No	Undifferentiated SH-SY5Y express TH and DAT	Unknown how they checked it
15280438		x			TH	Unknown	DMEM, 10%FCS	No	Undifferentiated SH-SY5Y express TH
15492001				x	DA uptake	ATCC	DMEM, 10%FCS, 1%antibiotics	No	Unidfferentiated SH-SY5Y have basal DA uptake
15649705		x			TH	Unknown	DMEM, 10%FCS	No	Undifferentiated SH-SY5Y express TH
15740846	x	x			DAT, Nurr1, VMAT2	Unknown	DMEM, 10%FBS	No	Undifferentiated SH-SY5Y express DAT, Nurr1 and VMAT2
17131421	x	x			TH, VMAT2, DAT	ECACC	DMEM/F12, 10%FBS, 2mM L-glutamine, antibiotics	No	Undifferentiated SH-SY5Y express VMAT2, TH, DAT (qPCR) and DAT (WB)
17135412			x		TH	ATCC	High glucose DMEM, 10%FBS, 1%antibiotics	No	Undifferentiated SH-SY5Y express TH (almost all cells)
17681692		x			TH	Unknown	Unknown	No	Undifferentiated SH-SY5Y express TH at low levels, and it is enhanced by Nurr1 transfection
18599602		x	x		TH, DA, VMAT2	Unknown	DMEM, 10%FCS	No	Undifferentiated SH-SY5Y express TH, DA and VMAT2	Only one cell per image, really low intensity staining
19012744			x		TH	ECACC	MEM/F12, 15%FBS, 1%NEAA, antibiotics	No	Undifferentiated SH-SY5Y express TH (almost all cells)
19014385		x	x		TH	ATCC	DMEM/F12 with glutaMAX, 10%FBS	No	Undifferentiated SH-SY5Y express TH	Low intensity staining
19558709	x				DAT, DDC	Unknown	DMEM, 10%FBS	No	Undifferentiated SH-SY5Y express DAT and DDC
19735704	Not shown				TH	Korean Cell Line Bank (KCLB)	Unknown	No	Undifferentiated SH-SY5Y express TH (WB)
20851755	Not shown				TH	Korean Cell Line Bank (KCLB)	Unknown	No	Undifferentiated SH-SY5Y express TH (WB)
21338582		x			TH	ATCC	EMEM/F12, 10%FBS	No	Undifferentiated SH-SY5Y express TH
21536104	x	x			TH	Unknown	DMEM, 10%FBS, antibiotics	No	Undifferentiated SH-SY5Y express TH	Really small band in the WB
21737065			x		TH, DAT, VMAT, AADC	ATCC	DMEM, 10%FBS, 1%antibiotics	No	Undifferentiated SH-SY5Y express TH, DAT, VMAT and AADC	Only DAT staining bright and present in all cells
21899552		x			TH	ATCC	DMEM/F12, 10%FBS, 1%antibiotics	No	Undifferentiated SH-SY5Y express TH	Increased expression upon rotenone treatment
21951066	x	x			TH, DA	ATCC	DMEM/F12, 10%FBS, 1%antibiotics	No	Undifferentiated SH-SY5Y express TH
23065334		x	x		TH	ATCC	High glucose DMEM, 10%FBS	No	Undifferentiated SH-SY5Y express TH	Only two cells shown
23688541	x	x			TH, DAT, VMAT2	Peking Union Medical College (Beijing, China)	45%DMEM, 45%F12, 10%FBS, 100U/mL antibiotics	No	Undifferentiated SH-SY5Y express TH, DAT and VMAT2
23857913		x			pTH	ATCC	MEM, 10%FBS, 1mM sodium pyruvate, 0.1mM NEAA, 1%antibiotics	No	Undifferentiated SH-SY5Y express phospho-TH
24793810		x		x	TH	ATCC	DMEM, 10%FBS, 25ug/uL antibiotics	No	Undifferentiated SH-SY5Y express TH
25206503		x	x		TH	ATCC	DMEM, 10%FBS, 1%antibiotics	No	Undifferentiated SH-SY5Y express TH
25274329	x	x		x	TH, DAT, DA levels	Xuanwu Hospital, Beijing, China	DMEM, 20%FCS, 1%antibiotics, 2mM L-glutamine	No	Undifferentiated SH-SY5Y express TH and DAT; and it has basal DA content
25825926			x		TH, DAT, VMAT2, DRD2	ATCC	DMEM/F12, 10%FBS, 2mM L-glutamine	No	Undifferentiated SH-SY5Y express TH, DAT, VMAT2 and DRD2
26188143	x	x			TH	Unknown	DMEM, 10%FBS	No	Undifferentiated SH-SY5Y express TH
26866473		x	x		TH	ATCC	DMEM, 10%FCS, 1% L-glutamine, 0.5% antibiotics	No	Undifferentiated SH-SY5Y express TH
27064513			x	x	TH, DAT, VMAT2, DAT, Nurr1, Pitx3, DA release	Gift from Dr. Asok Mukhopadhyay, National Institute of Immunology (NII), New Delhi, India	DMEM/F12, 10%FBS, 1xGlutaMAX, 1%antibiotics	No	Undifferentiated SH-SY5Y express TH, DAT, VMAT2, DAT, Nurr1, Pitx3 and release DA	Really intense and homogeneous stainings
16749908	Not shown				TH	Unknown	DMEM, 10%FBS, 2mM glutamine, 1%antibiotics	Yes (10μM RA and 80nM TPA)	Differentiated SH-SY5Y express TH
17005870		x		x	TH	ATCC	DMEM/F12, 10%FBS, antibiotics	Yes (20μM RA for 5 days)	Differentiated SH-SY5Y do not express TH, dopamine or L-dopa	They have as a "control" SH-SY5Y cells transfected with TH
17465879		x			TH	M. Nomura (Hokkaido University) and N. Hattori (Juntendo University)	DMEM, 10%FCS	Yes (10μM RA and 80nM TPA)	Differentiated SH-SY5Y express TH depending on their cell source
17482356		x	x		TH	Unknown	DMEM, 10% FBS	Yes (10μM RA and 1nM melatonin)	Differentiated SH-SY5Y express TH
17982873	x	x	x		TH, MAP2, DAT, DRD2, NeuN…	Deutsche Sammlung von Mikroorganismen und Zellkulturen GmbH	DMEM, L-gutamine, sodium pyruvate, 1000mg/L glucose, NEAA, 20%FBS, 1%antibiotics, 10mM HEPES	Yes (10μM RA and mitotic inhibitors)	Differentiated Sh-SY5Y express TH, MAP2, DRD2, NeuN…
18325635			x	x	TH, DAT, DA uptake	ATCC	DMEM/F12, 10%FBS, antibiotics	Yes (10μM RA, 50ng/mL BDNF and reduced serum)	Differentiated SH-SY5Y express TH and DAT
18359086			x		TH	Gift from Dr. Seung-Jae Lee at The Parkinson’s Institute.	DMEM-High glucose (4000mg/L), 10%FBS, 1%antibiotics, 2mM GlutaMAX	Yes (50μM RA and 50nM TPA)	Differentiated SH-SY5Y express TH	Counts only, images not shown
18410503			x		DAT	ATCC	DMEM, 10%FCS, 1%antibiotics, 0.01uM NEAA	Yes (10μM RA and 80nM TPA)	Differentiated and undifferentiated SH-SY5Y express DAT
19056420		x			TH, DAT	Unknown	MEM, 10%FBS, 2mM L-glutamine, antibiotics	Yes (10μM RA and reduced serum)	Differentiated and undifferentiated SH-SY5Y express TH and DAT	Expression independent of differentiation
19114014			x		TH, DAT, VMAT2, DRD2	Unknown	High glucoses DMEM, 10%FBS, 100ug/mL pyruvate, 50ug/mL uridine, 1%antibiotics	Yes (neurobasal media and 6-10nM staurosporine)	Differentiated SH-SY5Y express TH, DAT, VMAT2, DRD2	Only one cell per staining shown
20380819		x	x		NeuN, TH, NSE	ATCC	DMEM/F12, 10%FBS, 2mM glutamine, antibiotics	Yes (10μM RA and reduced serum)	Differentiated SH-SY5Y express NeuN, TH and NSE
21856379	x	x			TH	Unknown	DMEM/F12, 10%FBS, 1%antibiotics	Yes (10μM RA, 100ng/mL BDNF)	Differentiated SH-SY5Y express TH
22271527		x			TH, DAT	ATCC	DMEM/F12, 10%FBS, 2mM glutamine, antibiotics	Yes (10μM RA and reduced serum)	Differentiated SH-SY5Y express TH and DAT
23653325	x		x		TH	National Centre for Cell Science, Pune, India	High glucose DMEM, 10%FBS, 0.5%antibiotics, 0.10mg/mL pyruvate, 0.05 mg/mL uridine	Yes (10μM RA)	Differentiated SH-SY5Y express TH
23724009	x		x	x	TH, VMAT2, dopamine (and many others)	ECACC	DMEM/F12, 0.5%FCS, antibiotics	Yes (10μM RA)	Differentiated SH-SY5Y have a DArgic phenotype	Purpose of the study
23818941		x	x		TH	ATCC	OptiMEM, 10%FBS	Yes (neurobasal + B27 + 10μM RA for six days, or same as before for 3 days and 3 days with 100nM TPA)	Differentiated SH-SY5Y both with RA and RA+PMA increase the expression of TH, but there is some basal expression on undifferentiated cells	TH is considered a "mature" neuronal marker
23996657		x			TH, VMAT2, dopamine	Provided by Dr. Javier Sáez-Castresana (University of Navarra)	DMEM/F12 with GlutaMAX, 10%FBS, 1%antibiotics	Yes (neurobasal media and 6nM staurosporine)	Differentiated SH-SY5Y express TH, VMAT2 and DA
24341912			x		TH	ATCC	DMEM/F12 with L-glutamine and 15mM HEPES, 1%antibiotics, 10%FBS	Yes (10μM RA and 80nM TPA)	Differentiated SH-SY5Y express TH
24508709			x		TH, DAT	LGC Promochem	DMEM/F12, 10%FBS, 1%antibiotics	Yes (10μM RA and reduced serum)	Differentiated SH-SY5Y express TH and DAT
26287258			x		TH	ATCC	MEM/F12, 10%FBS, 1%NEAA, 1%antibiotics	Yes (10μM RA, 50ng/mL BDNF without serum)	Differentiated SH-SY5Y express TH
26364587	x	x			TH	ATCC	DMEM, 10%FBS, 1%antibiotics, 2mM L-glutamine	Yes (10μM RA and reduced serum)	Differentiated SH-SY5Y express TH
26634154		x	x		TH	Unknown	MEM/F12, 10%FBS, 1mM sodium pyruvate, 0.1mM NEAA, 1.5g/L sodium bicarbonate, 1%antibiotics	Yes (10μM RA and reduced serum)	Differentiated SH-SY5Y express TH	Purpose of the study
26649942	x	x			DRD2, DRD3	ATCC	DMEM, 10%FBS, 1%antibiotics	Yes (10μM RA and 80nM TPA)	Differentiated SH-SY5Y express DRD2 and DRD3
26981313			x		TH	Unknown	MEM/F12, 10%FBS	Yes (10μM RA)	Differentiated SH-SY5Y express TH	Same images as 26634154
27217159		x	x		TH, DAT	The Center Cell Resources of Shanghai Institute of Life Science Chinese Academy of Sciences	MEM/F12, 12-15%FBS	Yes (50ng/mL GDNF)	Differentiated SH-SY5Y express TH and DAT
