# Supplementary material for: The SH-SY5Y cell line in Parkinson’s disease research: a systematic review
Source: Mol Neurodegener. 2017 Jan 24;12:10. doi: 10.1186/s13024-017-0149-0 (PMC5259880; doi:10.1186/s13024-017-0149-0)
Supplement: Additional file 4: — Alternative neuronal (−like) cell lines used to validate the findings in SH-SY5Y cells. The table contains the neuronal (−like) cell lines that have been used in parallel with SH-SY5Y cells to study PD and the species from which they are derived, the cell type and the number of articles that used the cell line. (XLSX 13 kb) [file 13024_2017_149_MOESM4_ESM.xlsx]

## Sheet: Additional file 1
Additional file 4. Alternative neuronal(-like) cell lines used to validate the findings in SH-SY5Y cells.
The table contains the neuronal(-like) cell lines that have been used in parallel with SH-SY5Y cells to study PD and the species from which they are derived, the cell type and the number of articles that used the cell line.
Cell line name	Species	Cell type	Number of articles
Mesencephalic cultures	Mus Musculus/Rattus norvegicus	Neuronal cells	54
Primary neurons (cortical mainly)	Mus Musculus/Rattus norvegicus	Neuronal cells	46
PC12	Rattus norvegicus	Pheochromocytoma	39
Neuro-2a	Mus Musculus	Neuroblastoma	13
hESC, NPSC, hMSC, iPSCs	Homo sapiens	Stem cells	9
SK-N-BE(2)-M17(M17)	Homo sapiens	Neuroblastoma	9
Primary neurons	Homo sapiens	Primary neurons	8
MN9D	Mus Musculus	Cell hybrid	7
Fibroblasts	Homo sapiens	Fibroblasts	7
SH-SY5Y-Homo sapiens cybrids	Homo sapiens	Cybrid	5
ReNcell VM	Homo sapiens	Neural progenitor cells	4
SK-N-SH	Homo sapiens	Neuroblastoma	4
MES23.5	Mus Musculus/Rattus norvegicus	Cell hybrid	4
CGNs	Rattus norvegicus	Cerebellar neurons - Glutamatergic	3
SK-N-BE(2)C	Homo sapiens	Neuroblastoma	3
Other animals	Caenorhabditis elegans	Neurons/DAergic	2
CATH.a	Mus Musculus	Brain tumor	2
TSM1	Mus Musculus	Neuronal cells	2
IMR32	Homo sapiens	Neuroblastoma	2
HB1.F3	Homo sapiens	Neural stem cells	1
GOTO-P3	Homo sapiens	Neuroblastoma	1
SK-N-AS	Homo sapiens	Neuroblastoma	1
SK-N-MC	Homo sapiens	Neuroblastoma	1
CSF, brain and limphocytes of patients	Homo sapiens	-	1
NSC-34	Mus Musculus	Cell hybrid - motor neuron	1
GT1-1	Mus Musculus	Hypothalamus	1
N1E-115	Mus Musculus	Neuroblastoma	1
NG-108-15	Mus Musculus/Rattus norvegicus	Cell hybrid - neuroblastoma/glioma	1
B65	Rattus norvegicus	CNS-derived	1
N27	Rattus norvegicus	Immortalized DAergic cell line	1
TT2 cells	Mus Musculus	Embryonic stem cell line	1
SK-N-F1	Homo sapiens	Neuroblastoma	1
SK-N-DZ	Homo sapiens	Neuroblastoma	1
LA-N-2	Homo sapiens	Neuroblastoma	1
